# Supplementary material for: An incoherent feedforward loop facilitates adaptive tuning of gene expression
Source: eLife. 2018 Apr 5;7:e32323. doi: 10.7554/eLife.32323 (PMC5903863; doi:10.7554/eLife.32323)
Supplement: Supplementary file 1. — (A) SNPs identified in each LTEE. Variants identified in each LTEE at four different time points throughout the evolution experiments and present at an allele frequency of at least 1% are listed. (B) Global gene expression analysis. Mean expression values for each gene for three GAT1 variants relative to the ancestral genotype as determined by RNAseq are presented as log2 values along with an estimate of statistical significance. Gene expression of lineages and the population studied in (Hong and Gresham, 2014) are shown for reference. (C) Quantification of promoter activity using transcriptional reporters. The median fluorescence for each transcriptional reporter in each of the four GAT1 genotypes relative to the ancestral strain was determined in different conditions. (D) Quantification of transcription factors binding affinity. Parameters estimated from fitting a Michaelis-Menten function to EMSA data. Fr_max is the maximal of bound over total DNA. K_x is the concentration of protein required for half-maximal binding. Non-significant parameter values are in grey italics. (E) Strains used in this study. (F) Plasmids used in this study. [file elife-32323-supp1.xlsx]

## Sheet: Supplementary file 1A
Experiment	Time (G)	Gene	chr	pos	ref	alt	aa change	AF(%)
R1	47	GAT1	chr06	96990	G	T	G342V	1.7
	104	GAT1	chr06	96929	A	G	R322G	5.7
		GAT1	chr06	96930	G	T	R322M	2.6
		GAT1	chr06	96974	T	C	F337L	2.9
		GAT1	chr06	96975	T	C	F337S	1.6
		GAT1	chr06	96976	C	A	F337L	2
		GAT1	chr06	96987	A	T	H341L	1
		GAT1	chr06	96990	G	T	G342V	14.7
		GAT1	chr06	96999	G	C	R345T	1.5
		GAT1	chr06	97000	G	T	R345S	2
	180	GAT1	chr06	96929	A	G	R322G	1.2
		GAT1	chr06	96990	G	T	G342V	5.9
		TPK3	chr11	134739	T	G	S323R	1.1
		WHI5	chr15	480112	C	T	Q194*	1.4
	250	RPL26B	chr07	555937	T	C	intronic	18.4
		LST4	chr11	115948	A	C	L680*	5.7
		TPK3	chr11	134739	T	G	S323R	1
		YKL050C	chr11	343636	A	G	L662S	18.3
		WHI5	chr15	480112	C	T	Q194*	6.9
		WHI5	chr15	480179	C	G	N198S	1.2
		MEP2	chr14	CNV (>= 2 copies)*				63
R2	47	GAT1	chr06	97000	G	T	R345S	0.8
	104	GAT1	chr06	96929	A	G	R322G	37.6
		GAT1	chr06	96930	G	T	R322M	2.9
		GAT1	chr06	96974	T	C	F337L	12.2
		GAT1	chr06	96998	A	T	R345W	15.8
		GAT1	chr06	96999	G	C	R345T	1.4
		GAT1	chr06	97000	G	T	R345S	1.4
	180	GAT1	chr06	96929	A	G	R322G	5
		GAT1	chr06	96974	T	C	F337L	1.7
		GAT1	chr06	96998	A	T	R345W	16.6
		TPK3	chr11	134993	T	C	D238G	2.5
		VAC14	chr12	895839	G	T	E738*	4
	250	DAL81	chr09	400874	G	A	W366*	1.3
		DAL81	chr09	401706	G	T	E644*	56.9
		GAT1	chr06	96998	A	T	R345W	11.6
		TPK3	chr11	134781	C	A	D309Y	1.1
		TPK3	chr11	134993	T	C	D238G	9.1
		YKL162C	chr11	147767	C	T	E358K	54.8
		VAC14	chr12	895839	G	T	E738*	10.9
		MEP2	chr14	CNV (>= 2 copies)*				86
R3	47	GAT1	chr06	96929	A	G	R322G	2.3
		GAT1	chr06	96998	A	T	R345W	2
	104	GAT1	chr06	96918	C	T	T318I	1.2
		GAT1	chr06	96929	A	G	R322G	4.3
		GAT1	chr06	96930	G	C	R322T	12
		GAT1	chr06	96931	G	T	R322S	1.3
		GAT1	chr06	96935	G	T	D324Y	1.4
		GAT1	chr06	96961	T	A	N332K	1.2
		GAT1	chr06	96962	G	A	A333T	1
		GAT1	chr06	96963	C	T	A333V	1.6
		GAT1	chr06	96969	G	A	G335D	3.2
		GAT1	chr06	96971	C	T	L336F	2.4
		GAT1	chr06	96974	T	G	F337V	1
		GAT1	chr06	96975	T	C	F337S	3.3
		GAT1	chr06	96980	A	G	K339E	3.2
		GAT1	chr06	96986	C	G	H341D	1.3
		GAT1	chr06	96987	A	C	H341P	1.7
		GAT1	chr06	96998	A	G	R345G	6.1
		GAT1	chr06	96999	G	C	R345T	6.2
		GAT1	chr06	97000	G	T	R345S	15.5
	180	GAT1	chr06	97000	G	T	R345S	1.6
		GAT1	chr06	97002	C	T	P346L	0.9
		GAT1	chr06	97261	C	G	H432Q	21.3
		GAT1	chr06	97298	T	A	S445T	2.1
		MEP2	chr14	358507	G	C	G352A	2.1
	250	GAT1	chr06	96930	G	C	R322T	3.4
		GAT1	chr06	97035	G	T	R357I	4.4
		GAT1	chr06	97261	C	G	H432Q	21.1
		GAT1	chr06	97298	T	A	S445T	2.7
		TMA108	chr09	90463	C	T	V776I	7
		PAN1	chr09	365933	C	A	A1326S	10
		LST4	chr11	116818	C	T	R390K	1.6
		MEP2	chr14	CNV (>= 2 copies)*				36

## Sheet: Supplementary file 1B
Gene	gat1-1	gat1-2	gat1-3	FDR:gat1-1	FDR:gat1-2	FDR:gat1-3	evolved pop	gat1-1,mep2-1,lst4-1,vtc2,kel1	gat1-3,mep2-2,vac14,ybr271w,nup170,scm4	NCR gene?
YPL225W	-6.87733	0.0466449	-0.071137	1.4538e-86	0.896207	0.864602	0.74	0.62	0.47
DIP5	-5.4171	-4.7636	-3.7704	9.64674e-77	1.13307e-56	6.60961e-36		-5.06	-4.47
PFK27	-5.87086	0.355705	-0.00669293	2.15151e-65	0.223641	1	-0.145	-1.02	-0.5
DSE1	-5.46181	-0.0616521	0.887592	2.06171e-61	0.882124	0.00108627	0.775	0.32	0.93
YLR053C	-4.57164	-5.2495	-3.53921	3.48685e-60	6.60697e-64	1.81843e-35		-4	-4.58
DAL2	4.72717	5.66457	5.43245	1.04196e-49	1.66453e-91	2.58983e-76	2.695	4.02	3.27	NCR
AGA2	3.41813	4.49923	3.66758	1.12706e-48	8.47916e-77	3.62874e-40		1.78	1.56
DUR1,2	5.34885	5.07099	4.30385	2.32953e-47	8.02433e-45	8.26934e-32	1.68	2.45	1.89	NCR
LTP1	-6.02107	0.468378	-0.029814	1.00756e-46	0.0353675	0.960805	1.6	1.25	1.06
BRX1	-4.37266	0.944933	0.454386	1.14729e-45	0.000660802	0.193143	-0.265	0	-0.13
DLD3	-4.65087	-2.93014	-3.00168	3.07958e-45	8.41207e-18	1.67849e-16	1.075	0.58	-0.24
DAL3	5.2691	4.62371	4.43408	3.4401e-43	4.49759e-63	2.9378e-54	4.14	5.17	4.29	NCR
RPB10	-5.90539	-0.213692	0.664896	3.76411e-43	0.434661	0.0360514	0.655	0.37	0.35
VMA21	-6.07617	0.356031	0.818285	6.813e-42	0.166747	0.000970299	1.5	0.63	0.42
GPI17	-5.9648	-0.0687245	-0.0998222	1.60574e-40	0.919685	0.825153	-0.24	-0.22	-0.23
RMD6	-4.8787	-2.78059	-3.62596	2.90671e-40	7.35705e-21	2.03082e-27	-0.5	-0.56	-0.57
SUL1	-4.52801	-4.7261	-4.86175	3.60898e-39	3.87229e-40	5.56236e-30	-0.7	-1.02	-0.96
MET16	-3.83439	-1.60601	-1.97689	1.45597e-37	2.52396e-11	2.13907e-14	0.02	0.39	0.15
EPT1	-6.05856	0.0991634	0.462965	2.11624e-37	0.735741	0.111354	0.87	0.34	0.23
BDS1	-3.15965	-2.79123	-3.04412	4.0216e-37	3.5423e-29	9.55206e-29		-0.2	-0.76
PMP1	-3.60956	0.861349	1.94571	3.79493e-36	0.000226626	1.24423e-06	1.035	-0.12	-0.02
ERD2	-4.92068	-0.470666	0.0336785	1.39458e-35	0.0944553	0.922793	0.78	0.64	0.48
PAA1	-4.73452	-0.0806817	0.241039	9.95117e-35	0.821689	0.486008	1.25	1.1	1.03
COG7	-5.06081	0.978075	1.43976	3.27241e-34	1.34553e-05	1.06107e-09	0.22	0.11	0.04
AGA1	3.07583	5.44897	4.12745	9.85524e-34	2.55741e-91	1.36254e-50	0.27	2.14	1.98
RTN2	2.98238	-0.148364	-1.85405	1.7199e-33	0.596186	1.57191e-10	-3.27	-2.53	-1.84
ARG3	-4.08215	-2.74092	-0.813389	2.74552e-33	1.40588e-21	0.0127339	-0.595	-0.46	0.21
KEG1	-5.8096	-0.290468	-0.422401	4.41967e-33	0.294169	0.176605	0.305	0.21	0.32
TIP1	2.86609	3.37813	3.91741	1.852e-32	1.50718e-49	1.4279e-56	4.115	2.19	1.99
YGP1	2.76878	1.51155	-0.326607	1.852e-32	1.29761e-09	0.272788	0.22	-0.89	0.1
NUP82	-4.94425	-0.301263	-0.297391	3.6953e-32	0.368516	0.421715	-0.12	0.22	0.09
OST2	-4.40575	0.62743	1.63808	3.6953e-32	0.00604082	4.60716e-06	0.4	0.27	0.39
NIT1	-3.34545	-2.29215	-2.50667	4.60155e-32	1.49107e-15	1.84664e-17	-2.845	-1.55	-2.1
GAT1	3.22335	2.90304	3.67122	4.851e-32	4.72247e-35	1.62012e-46	1.98	1.43	1.65	NCR
MFA1	2.98589	3.89687	3.5832	1.15801e-31	1.45181e-61	4.6938e-50	4.775	3.25	2.86
NOP58	-3.03409	-0.28558	-0.893749	2.00053e-30	0.381534	0.00622156	-0.08	-0.09	-0.12
MUP1	-5.77934	-5.44662	-6.21491	5.12102e-30	1.26396e-20	7.81385e-25	-0.55	-1.21	-0.96
YHI9	-2.71319	-2.59048	-2.1788	1.46795e-29	9.05894e-26	9.9715e-17	-2.195	-2.01	-2.44	NCR
STR3	-3.47285	-3.68836	-3.44231	2.6269e-28	5.54847e-26	2.28883e-20		-1.43	-0.98
CIT2	-5.10731	-1.10222	-1.03478	2.94493e-28	0.0281844	0.0441519	0.195	-0.22	-1.28
YGR149W	-5.94935	-1.31019	-1.54074	7.16088e-28	1.42439e-05	7.06689e-06	-0.725	-0.97	-0.57
SEC5	-5.77645	-0.101534	-0.0342802	1.35539e-27	0.865077	0.997317	-0.385	-0.22	-0.1
EMC6	-3.61169	-0.50474	0.1045	2.7993e-27	0.0662218	0.754185	0.28	0.03	-0.17
NOP7	-3.21218	-0.533845	-1.0864	3.06826e-27	0.0506892	6.95763e-05	-0.385	0.02	-0.07
MET3	-3.75177	-3.4923	-4.5793	3.06826e-27	8.75086e-21	3.81685e-30	0.725	0.58	0.65
MF(ALPHA)1	4.28004	8.04285	4.34955	6.5947e-27	2.13134e-156	3.26843e-62		4.22	3.41
EMC4	-3.31286	0.385905	0.142362	7.23344e-27	1.80034e-08	2.35347e-09	0.77	0.62	0.67
MET6	-2.63314	-3.41016	-4.08981	7.7777e-27	0.191021	0.652628	0.29	-0.19	0.16
RRP12	-2.99895	0.093579	-0.118588	1.08602e-26	4.50807e-30	1.3549e-47	-0.78	-0.39	-0.54
UTP10	-3.84848	-0.189788	-0.694309	4.51143e-26	0.812554	0.810643	1.42	1.08	1.06
NOP13	-3.17091	-0.854088	-1.16806	4.51143e-26	0.62432	0.0470461	-0.41	-0.08	-0.24
FMP45	2.51942	-0.0354691	-1.06774	7.31154e-26	0.00206696	0.000705751	-2.3	-2.4	-1.42
HCA4	-2.94084	-0.14177	-0.707471	9.929e-26	0.874275	0.00106164	-0.71	-0.49	-0.55
MFA2	2.44774	3.52531	3.19724	1.40142e-25	0.723583	0.0535028	4.74	3.12	2.96
UTP21	-2.76705	0.0795154	-0.694961	3.04138e-25	1.22728e-57	9.37933e-38	-0.58	-0.16	-0.29
DRS1	-3.05681	-0.800324	-1.37251	5.54377e-25	0.829207	0.0396371	-0.535	-0.07	-0.32
HAT1	-4.52888	1.0613	0.735287	6.25179e-25	0.0172054	0.000324476	0.28	0.23	0.14
ENP2	-2.62542	0.26039	0.139222	6.49749e-25	6.65504e-06	0.0050757	-0.22	-0.34	-0.46
DBP3	-3.28953	-0.467696	-1.09084	2.52221e-24	0.388966	0.724266	-0.835	-0.34	-0.43
STE6	2.33329	3.34388	2.60905	3.49854e-24	0.210825	0.0055549	2.885	2.65	2.19
OSW2	-3.30462	-2.78005	-2.23878	3.88666e-24	1.79583e-47	3.55929e-27		0.21	-0.24
UTP4	-3.45058	0.435741	-0.242567	6.16787e-24	5.31638e-23	8.5748e-15	-0.325	-0.36	-0.35
MAK5	-2.97937	0.0930355	-0.138252	7.02128e-24	0.228905	0.612223		-0.08	-0.22
SPB1	-2.70428	0.0470062	0.0193203	7.54019e-24	0.817879	0.809241	0.48	0.25	0.15
YKL202W	-3.05633	-3.18347	-4.22345	8.65812e-24	0.911301	0.973677
YPL071C	-3.51751	0.695229	1.12567	1.24646e-23	1.7894e-26	8.74493e-32	0.47	0.2	0.24
NOP4	-2.5197	0.175971	0.325978	1.28596e-23	0.00470723	8.88581e-06	-1.015	-0.87	-0.96
SMD2	-5.87589	1.07823	1.37533	1.42716e-23	2.93013e-09	0.377356		-0.02	-0.22
CIC1	-4.68159	0.662918	-0.0408722	1.4774e-23	0.581606	0.314774	-0.09	0.02	0.13
YNL195C	2.32216	-0.976987	-2.0319	1.67184e-23	2.66566e-06	6.85555e-09	-2.59	-3.07	-2.05
MEP1	2.41278	1.76921	1.43739	2.24935e-23	0.0766542	0.985123	1.505	1.66	1.65	NCR
KRE27	-5.13292	-0.131842	0.59782	4.30636e-23	0.00444665	3.22988e-07		0.37	0.33
SEO1	-3.31762	-3.48439	-2.9076	5.641e-23	7.10136e-14	1.01477e-08	-1.265	-0.59	-1.16
CGI121	-8.9312	-0.175243	0.114524	5.84007e-23	0.81727	0.0291871	0.81	0.52	0.4
MAK21	-2.74389	-0.492338	-0.500212	6.86648e-23	8.65502e-26	3.89238e-18	0.03	-0.02	-0.07
KRE33	-2.97093	-0.331638	-0.962076	6.99013e-23	0.677963	0.777764	-0.17	0.15	-0.15
TEF2	-2.75865	0.0489366	-1.00886	8.80609e-23	0.127506	0.177555	-0.065	0.54	0.74
NOP1	-2.69779	-0.515364	-0.65313	8.88882e-23	0.341469	0.0126515	1.11	0.34	0.38
RRP8	-2.63194	0.167302	-0.277472	1.04337e-22	0.900488	0.00112544	-0.72	-0.39	-0.55
DUR3	2.59095	3.31633	3.45587	1.29452e-22	0.0944929	0.0519621	-0.355	-0.36	-1.06	NCR
MEP3	2.20649	2.13911	1.52023	1.35103e-22	0.631962	0.451208	3.21	3.01	2.64	NCR
AAH1	-3.75295	-0.40159	-1.05598	1.77445e-22	7.09421e-36	1.67692e-33	-0.29	-0.55	-0.57
OM45	2.7354	0.41498	-0.984565	1.9657e-22	9.98087e-20	2.99469e-10	-2.155	-1.15	-0.88
RPA49	-2.54331	0.244866	-0.543047	3.19095e-22	0.384487	0.0126039	-0.925	-0.52	-0.59
BFR2	-2.6771	-0.175848	-0.703212	3.27977e-22	0.174554	0.00442878	-1.15	-0.43	-0.58
NOP14	-2.56691	0.164256	-0.43536	4.89736e-22	0.0425936	0.0104284		-0.68	-0.79
FYV7	-2.15796	0.163691	0.536804	8.7397e-22	0.0126253	3.57987e-08	-0.48	-0.15	-0.48
YMR185W	-3.47574	0.454227	0.505027	1.10343e-21	0.439376	0.164794	0.19	0.01	-0.12
YBR063C	-4.37693	-0.311624	-0.216138	1.53459e-21	0.643523	0.047924	-0.675	-0.52	-0.53
GDH1	2.26494	1.29437	1.05567	1.63803e-21	0.628538	0.247695	2.99	3.67	3.04
ARX1	-3.38786	0.769408	-0.137454	1.66049e-21	0.579329	0.0455498	-0.02	-0.17	-0.1
LTV1	-2.12369	0.524814	0.13423	2.02998e-21	0.0979085	0.083968	-0.74	-0.17	-0.39
YGR026W	-3.43772	-0.0583284	0.107484	2.15419e-21	0.320118	0.603814	0.85	0.52	0.54
UTP13	-3.59696	0.538576	-0.389648	2.24249e-21	7.61795e-08	5.97375e-05		0	-0.18
PUF6	-3.58856	0.220953	-0.526023	2.26544e-21	0.0302342	0.843506	-0.35	-0.32	-0.32
CTT1	2.27377	0.894008	-1.49288	3.92712e-21	0.0351983	0.695503	-3.87	-3.5	-2.54
YKL100C	-2.06139	-0.747013	-0.887709	1.20405e-20	0.875011	0.753849	-0.41	-0.77	-0.49
MET5	-2.65268	-2.31932	-3.57761	1.31961e-20	0.123069	0.505379	0.425	0.03	-0.01
FAR1	2.33351	3.21055	1.8259	1.84811e-20	0.618896	0.250998	3.265	2.38	2.09
CBF5	-2.17605	-0.962714	-1.10423	1.93662e-20	0.000571426	4.13619e-08	-0.3	-0.14	-0.25
MET10	-2.63264	-2.55963	-3.33339	1.98419e-20	0.00201936	0.000599891	-0.515	0.05	0
OPT1	-2.68716	-3.59126	-4.37049	2.09507e-20	3.57012e-14	4.40723e-30	-2.74	-2.31	-2.17
RPF2	-2.51649	0.0923127	-0.49457	2.39334e-20	2.02073e-47	9.73789e-17	-0.87	-0.41	-0.51
YML108W	-6.85052	0.787523	0.628135	2.98317e-20	0.000161545	0.000143979		0.34	0.09
ERB1	-2.79997	-0.513322	-1.10613	3.02995e-20	2.72876e-18	4.35553e-28	-0.77	-0.67	-0.65
NSR1	-3.08324	0.261926	-0.510344	3.75446e-20	7.92333e-27	8.73231e-33	-1.73	-1	-0.9
YJR071W	-3.76924	-1.18186	-2.64706	3.9915e-20	0.780796	0.128762	0.48	0.29
GET1	-2.54753	-0.226884	-0.237171	5.03122e-20	0.0098494	0.120912	0.59	0.2	0.24
PET111	-3.68467	-0.267271	0.191716	5.45546e-20	0.130024	0.00427075	0.3	0.12	0.07
FEN1	-2.61498	-0.589852	-0.695294	5.82115e-20	0.535891	0.272395	0.81	0.62	0.44
MTR4	-2.44014	-0.168285	-0.992177	6.49615e-20	0.000607022	3.45792e-09	-0.38	-0.21	-0.37
TKL2	2.59632	0.914981	-1.73259	6.76263e-20	0.370595	0.421852	-2.74	-3.38	-1.58
RPA34	-2.15766	-0.530646	-0.313761	7.95332e-20	0.382166	0.58381	-0.54	-0.48	-0.38
HMRA1	-5.17568	0.234043	1.6699	8.03628e-20	0.0479397	0.0253274	1.65	1.08	1
NOP53	-2.98836	-0.144705	0.0375737	9.74961e-20	0.654577	0.00492379		0.27	0.34
VOA1	-2.55585	-0.554419	-0.426482	1.05204e-19	0.00575527	3.07139e-08	0.18	-0.22	-0.25
SEC53	-2.27712	-0.590063	-0.592708	1.20852e-19	0.0496479	0.317377	0.485	0.17	0.1
YIL165C	-2.7287	-2.34746	-0.552295	1.20852e-19	0.425794	4.27778e-11	-2.73	-1.62	-2.19
GCD10	-2.84561	0.580614	-0.635437	1.4116e-19	0.77087	0.942389		0.1	-0.21
URA7	-2.90562	0.284701	-0.667003	1.61747e-19	0.041403	0.14643	-0.245	0.06	0.04
UTP14	-2.30047	0.24225	-0.157168	2.24776e-19	0.0266647	0.0410444		0.01	-0.03
DBP2	-2.93025	0.488748	-0.431564	2.27241e-19	1.34396e-20	0.0423213	-0.48	-0.3	-0.14
MET22	-1.96857	-1.1265	-1.36152	2.44094e-19	0.0273858	0.051708	0.2	0.2	0.09
YAT2	-3.2996	-2.64395	-2.1544	2.60789e-19	1.55085e-21	0.000178573	-0.19	-0.22	-0.43
ARG8	-2.40805	-2.12144	-1.35073	2.71908e-19	0.472137	0.122723	-0.135	-0.12	0.23
TRZ1	-3.13635	-0.328472	-0.791361	4.21934e-19	0.434661	0.72732		-0.45	-0.4
RMT2	-2.0788	0.833557	0.391121	5.04781e-19	0.199628	0.422242	-0.585	0.02	-0.21
SDS24	2.2078	-0.407477	-0.607873	5.71728e-19	9.76659e-07	6.95775e-08	-0.245	-0.84	-0.35
PWP1	-2.1877	0.224178	-0.345107	5.7722e-19	6.26351e-11	1.40265e-07		-0.28	-0.32
TSC13	-6.60985	0.667464	0.0964193	6.20366e-19	8.56359e-19	4.18027e-07	-0.065	-0.25	-0.12
XBP1	2.0191	-0.219106	-0.532965	8.56432e-19	0.317287	0.0161711	-0.92	-0.54	-0.29
NOP56	-3.02784	-0.259285	-0.836639	8.91757e-19	0.000229548	0.239414	0.325	0.12	0.05
SER33	-2.51872	-2.46316	-3.03844	8.9408e-19	0.121344	0.102536	-0.49	-0.33	-0.37
DIM1	-2.03242	-0.261247	-0.551252	9.66011e-19	0.469802	0.378678	-0.62	0.04	-0.12
TRM82	-2.85588	0.307808	-0.77031	1.00422e-18	0.32969	0.909446	-1.13	-0.67	-0.64
OST4	-3.7142	0.760846	1.48494	1.07227e-18	0.456139	0.110335	1.955	0.86	0.89
RPA135	-2.33002	-0.440153	-1.48905	1.10356e-18	0.453847	0.012108	-0.18	-0.11	0.01
IST3	-8.53344	-0.229228	-0.0730322	1.59293e-18	1.52739e-14	1.02328e-18		0.44	0.08
SPC3	-4.5814	-0.275443	-0.122972	1.61636e-18	0.295105	0.0381183	0.07	0	-0.13
HBT1	2.56223	1.57171	-0.205683	1.85616e-18	0.348451	0.0284999	-3.735	-3.37	-2.4
KRI1	-2.0087	-0.379409	-0.331893	3.10369e-18	0.00693396	3.86805e-07	-0.24	0.23	0.08
PRY1	2.00502	2.07048	1.72978	4.79504e-18	0.141345	6.36024e-06	6.93889e-18	0.17	0.33
HAS1	-2.5776	0.254626	-0.256938	5.47743e-18	0.645365	0.926783	-0.31	0.21	0.12
COG1	-3.46317	0.385311	0.771702	5.47743e-18	0.619654	0.862303	-0.15	0.53	0.45
YHR162W	-2.20088	-2.40541	-1.52789	5.87985e-18	3.50706e-07	0.633567	1.135	0.86	0.64
TEF1	-2.42818	0.0186313	-0.479173	6.75911e-18	0.184312	0.320612	-0.29	0.25	0.58
GCN3	-2.32547	0.135299	-0.110221	7.75575e-18	2.01255e-19	1.29977e-11	0.035	0.88	0.71
UIP4	2.25052	0.10342	-1.73173	8.64229e-18	0.462066	0.56486	-2.325	-1.73	-1.17
MSC1	2.23976	-0.267863	-2.18975	9.79907e-18	0.13776	0.0124714	-3.43	-2.39	-1.74
RKI1	-2.74551	-0.448539	-1.51797	1.26904e-17	1.9783e-20	5.86267e-08	-0.35	-0.32	-0.48
SAM3	-2.64399	-2.43816	-2.69551	1.8144e-17	0.973189	0.139698	-0.255	0.12	-0.36
SAM1	-2.13341	-1.8382	-2.65716	2.2911e-17	0.674257	0.806463	0.03	-0.24	-0.16
ROK1	-2.23417	0.131605	-0.398935	2.3459e-17	0.804122	3.33529e-09	-0.7	-0.36	-0.29
SNU13	-1.98818	-0.971866	-0.493663	2.53266e-17	0.44826	2.50902e-16	0.345	-0.4	-0.11
SUR4	-3.50707	-1.23639	-1.15291	2.77184e-17	0.200417	2.80603e-05	0.59	-0.16	-0.19
SSF1	-2.46272	0.154065	-0.212754	2.77184e-17	6.76649e-14	1.4718e-14	-1.15	-0.4	-0.55
DDR2	2.12839	0.490364	0.230996	3.31265e-17	6.15592e-10	9.09765e-22	-1.935	-1.74	-0.97
ROM1	2.08416	0.474009	-0.276261	5.07219e-17	0.656719	0.327194	0.33	0.45	0.64
HXT4	-3.22529	-2.96729	-3.96947	5.6045e-17	0.000177618	0.173902	0.69	-0.54	-0.6
MMP1	-2.57841	-3.41171	-4.0362	6.43777e-17	0.00620825	0.0115025	0.41	0.28	-0.01
TMA23	-2.0092	0.179249	0.318175	7.88446e-17	0.67965	0.642325	0.12	0.03	0.06
PRP43	-2.1543	0.161158	-0.679373	7.94702e-17	0.108964	0.493534	-0.735	-0.33	-0.43
RBG1	-2.31868	-1.0509	-1.24878	1.00001e-16	0.155876	0.494613	-0.495	0.1	-0.2
TRM3	-2.06008	0.392577	0.217904	1.01957e-16	9.11204e-13	9.74859e-18	-0.115	0.26	0.16
KRR1	-2.07343	-0.0171319	-0.796582	1.10287e-16	7.36256e-23	2.56229e-27	-0.07	-0.25	-0.2
RIX1	-2.82068	0.198694	-0.146822	1.55805e-16	0.477918	0.260416	-0.45	-0.17	-0.42
YNL200C	1.96456	-0.775854	-1.11998	1.76302e-16	0.636415	0.0625706	-0.705	-0.62	-0.51
NOP8	-2.52274	0.0823781	-0.268591	1.76845e-16	0.000464739	8.58762e-05	-0.82	-0.29	-0.31
URB1	-2.44006	0.0507453	-0.288971	2.01675e-16	0.133752	0.551549	0.285	0.61	0.4
CKA1	-2.06126	-0.544964	-0.58129	2.11266e-16	0.980776	0.00125892	0.35	0.44	0.38
CYS3	-1.88927	-2.11347	-3.10666	2.28099e-16	0.510206	0.747714	0.885	0.29	0.18
ATX1	-3.76789	-1.4677	-1.14398	2.47432e-16	0.00448746	0.000230939	1.145	0.39	0.09
LSM7	-4.99548	0.0848042	0.830244	2.64665e-16	0.829134	0.543055		1.06	1.12
SAM2	-2.34086	-2.36768	-3.23829	2.80577e-16	0.889372	0.461896	0.66	0.73	0.69
MYO3	1.83518	0.698088	0.729971	3.42999e-16	0.0529117	0.0574268	-0.405	0.09	0.17
SDA1	-1.89318	0.561622	0.0464257	3.73268e-16	8.40737e-14	1.69178e-24		-0.48	-0.63
YSC84	1.87404	-0.183949	-0.845505	3.87136e-16	1.78426e-05	0.00674049	-0.59	0.14	0.24
ELP2	-2.04564	-0.408579	-0.853104	4.77253e-16	0.818219	0.00928324	-0.53	0	-0.15
UTP23	-2.572	-0.431067	-0.59059	5.07732e-16	7.73771e-18	1.14077e-28	-0.59	-0.46	-0.57
GSY2	2.06934	-1.58411	-2.12535	6.206e-16	0.00122771	0.00236973	0.55	-0.02	0.58
DSE2	-1.93654	0.316516	2.023	6.39041e-16	0.0166689	0.00419706	1.255	0.17	0.82
SOL4	2.55641	-2.2265	-4.0026	6.54134e-16	3.15035e-09	0.00992235	-1.9	-0.97	-0.62
RPS10B	-4.28953	-0.839267	-0.761386	6.92604e-16	0.0242275	0.921491	0.905	0.74	0.65
RLP7	-3.97742	-0.413259	-0.781911	7.3841e-16	0.608327	0.0265985	0.115	0.33	0.23
SAS10	-2.1419	-0.223819	-0.406571	7.40941e-16	0.157187	0.00641537	-0.075	0.06	0.01
RIX7	-1.9111	0.455386	-0.452363	8.77228e-16	0.216587	0.105206	-0.97	-0.15	-0.4
HOM3	-2.4123	-1.53741	-1.55769	9.18251e-16	1.52405e-09	1.41719e-13	-0.735	-0.92	-0.88
FMP16	2.23175	1.53221	0.0232516	9.72517e-16	0.266817	5.27529e-14	-3.275	-2.67	-1.77
CAR2	2.15837	2.17227	1.69291	1.04904e-15	2.26619e-08	8.18367e-16	0.21	-0.49	0.07
RNH202	-3.34853	0.414031	0.562729	1.20826e-15	0.000774757	0.00726094	0.44	0.73	0.59
CUL3	-2.16863	1.17677	1.05796	1.33208e-15	0.414251	0.105835	-0.5	0.07	-0.16
JJJ1	-2.44043	0.0706846	0.451994	1.48519e-15	0.478235	0.192848		-0.1	0.07
YGL117W	-3.05959	-1.50402	0.928106	1.61033e-15	0.0720908	0.192729	0.25	0.58	-0.07
YRO2	1.78817	1.17844	-0.156161	1.64472e-15	3.39244e-06	6.36214e-06	-1.2	-1.02	-0.87
YMR187C	-3.97776	0.600511	0.462519	1.90128e-15	4.85125e-10	0.954235	-0.1	-0.08	-0.22
BAR1	2.91515	4.31336	2.67483	1.96718e-15	1.60784e-10	7.52778e-07		4.08	3.75
CYS4	-2.15132	-2.21437	-3.37897	2.19082e-15	0.126319	0.117094	-1.245	-1.29	-1.12
MES1	-2.54217	-0.56333	-1.13856	2.33528e-15	5.22225e-09	2.28623e-06	-0.165	0.02	-0.04
YJL163C	2.29472	-0.313352	-0.787654	2.3469e-15	0.858696	0.108904	-1.365	-1.21	-0.86
DCS2	2.05693	-1.24904	-2.49769	2.73199e-15	2.03668e-06	0.00110922	-1.68	-0.5	-0.35
GPD1	2.01774	-1.50489	-0.869534	2.96178e-15	1.24268e-07	0.722372	-0.24	-0.54	-0.04
LOC1	-1.72716	-0.535387	-0.236505	3.44475e-15	0.0564176	0.213033	0.305	0.43	0.27
OPT2	-2.17818	-0.903563	-1.0091	3.5774e-15	2.20933e-81	1.34321e-21	0.71	-2.75	-1.71
VBA1	-1.93281	-0.954147	-0.805601	3.61455e-15	5.1688e-13	2.27708e-21	-2.37	-1.79	-2.53
GPG1	1.91914	1.48934	0.171736	3.78366e-15	0.0744506	0.000142716	0.01	-0.07	0.04
YGL159W	-6.3679	-0.500365	0.396465	3.7918e-15	0.425412	0.118427	0.14	-0.09	-0.27
FPR4	-1.99276	-0.739637	-1.13779	3.9349e-15	7.34658e-06	2.65403e-16	-0.86	-0.52	-0.34
URK1	-2.06884	0.0268494	-0.459791	4.40408e-15	1.00515e-07	0.0831373	-1.75	-0.78	-1.1
NMD3	-1.73818	0.65055	0.140075	4.43642e-15	0.0251992	0.435172	-0.51	-0.23	-0.34
PGM2	2.36633	-1.19105	-2.57051	5.0828e-15	0.000712467	0.00111341	-1.27	-0.68	-0.29
NUP120	-5.29989	-0.334627	-0.21342	5.23713e-15	9.07363e-05	0.0026673	0.81	0.09	0.15
RPL43A	-3.7983	0.946599	-0.111479	5.81208e-15	3.13691e-11	0.626276	0.155	0.12	0
NOC2	-2.34941	-0.607069	-1.21292	6.6093e-15	0.31882	0.339657	-1.75	0.13	-0.01
NUP188	-2.10472	-0.261781	-0.318774	7.43635e-15	0.00456571	4.02145e-05	0.11	-0.1	-0.18
RPN8	-2.03576	-0.975132	-1.11879	7.71045e-15	0.948413	0.118291	0.595	0.64	0.44
PDH1	-3.01063	-1.5335	-1.46126	7.97002e-15	0.0115945	0.713992	-0.04	0.94	-0.07
YDL063C	-3.01242	0.246549	-0.171348	8.40869e-15	1.7619e-06	5.73356e-22	-1.37	-1	-1.06
YCR016W	-2.35729	-0.148736	-0.627109	9.67094e-15	0.621763	0.80067	-0.025	0.31	0.16
YLR118C	1.58735	0.813693	0.966095	1.04154e-14	0.00117622	0.890834	0.94	0.11	0.27
YKR011C	-2.6855	-0.592367	0.334816	1.06486e-14	0.0598325	0.000272865	0.18	0.23	0.4
SOF1	-2.11352	0.404273	-0.0239895	1.1638e-14	0.383085	0.340272	-0.8	-0.14	-0.29
TFS1	2.17006	-0.710403	-2.71476	1.26097e-14	0.00016414	5.44733e-05	-1.575	-1.36	-0.74
EFG1	-2.29014	0.0640499	-0.359368	1.53772e-14	2.876e-06	3.11094e-05	0.3	0.345	0.15
GPI15	-4.35673	-0.154047	0.233469	1.61839e-14	0.533584	0.765565	0.955	0.49	0.48
ATX2	-4.43946	-0.868297	-0.253249	1.64486e-14	0.641852	0.0298426	0.735	0.03	0.07
UGA1	1.67683	-0.0843904	-0.176858	1.76289e-14	0.000527373	7.4499e-05	-0.09	0	0.21	NCR
YNL194C	2.12161	-1.41263	-2.8176	1.84397e-14	0.146478	0.471066		-2.1	-0.9
RPB5	-1.99835	0.249854	-0.401507	1.85127e-14	0.132949	0.987899	0.5	0.61	0.68
TEC1	1.92122	1.78005	1.10287	1.87165e-14	0.0156504	1.55025e-17	1.335	1.25	1.3
GAD1	2.27381	0.16318	-1.58247	1.88367e-14	0.839988	0.254583	-1.98	-0.99	-0.57
IPI3	-2.71321	0.569552	0.00547347	2.03735e-14	0.8062	0.614437	-0.555	-0.1	-0.26
NIP7	-2.45684	0.491442	0.822003	2.35772e-14	0.0205296	0.6602	-0.17	0.3	0.04
SDP1	2.31328	0.215052	-0.0811088	2.38813e-14	0.811911	0.634468		-0.33	0.16
SCP1	-2.57447	-0.247553	-0.429414	2.89913e-14	1.29711e-05	2.40082e-14	0.185	0.3	0.05
NOP6	-1.89813	-0.743222	-0.938399	3.01138e-14	0.361116	0.194459	-0.285	-0.34	-0.41
NSA2	-1.93807	0.679058	-0.299891	3.08935e-14	3.49914e-15	1.12044e-05	-0.9	-0.23	-0.58
LSM2	-5.47658	-0.114812	1.08267	3.32619e-14	0.694528	2.69032e-07	0.635	0.52	0.47
ASG7	3.14575	4.08711	2.10769	3.557e-14	0.0677004	0.983988	4.49	3.37	2.8
DPH1	-2.73226	0.238826	-0.204875	4.07844e-14	0.05409	0.00156668	-0.7	-0.13	-0.3
STB6	-2.00577	-0.49775	-0.373731	4.16777e-14	0.640643	0.871182		0.11	-0.07
OCH1	1.79895	1.10146	1.43395	4.74656e-14	0.498004	0.155059	-0.8	-0.6	-0.33
HGH1	-1.77319	0.0815746	0.459296	4.95745e-14	0.00522272	0.000866313	-0.39	0.32	0.2
SRP40	-2.13435	-0.409817	-1.1318	5.23986e-14	0.0165322	0.446846	-0.805	-0.23	-0.36
ECM16	-2.05193	0.00382496	-0.538703	5.76089e-14	0.865334	0.00140089	-0.755	-0.51	-0.51
FUN14	1.65281	0.428542	-0.247169	5.92455e-14	4.04615e-55	9.26074e-09	0.41	0.84	0.84
JLP1	-1.99582	-2.61419	-1.91798	6.00801e-14	0.447709	0.687086	-2.9	-2.29	-2.79
ADE4	-1.77217	-1.6971	-2.17973	6.04993e-14	0.0473999	0.201385	-0.1	-0.18	-0.34
IMD4	-2.11045	0.119637	-0.409495	6.35238e-14	6.6423e-07	6.95775e-08	1.445	0.74	0.66
DBP9	-2.5401	0.291421	-0.00710122	6.39317e-14	0.787214	0.0871044	-0.3	-0.22	-0.19
UTP9	-3.41055	-0.375691	-0.770993	6.78624e-14	0.258501	0.00375719	-0.99	-0.45	-0.56
ELP3	-2.02655	-0.243528	-1.145	7.19157e-14	0.9975	0.140333	-0.36	0.2	-0.14
RRS1	-2.0026	0.934649	0.519619	7.19157e-14	0.0647751	0.442051		-0.66	-0.73
ATG15	1.65636	0.979965	0.200834	7.23169e-14	3.48039e-22	1.44674e-11	-1.2	-0.73	-0.69
GDB1	2.14509	-1.05389	-2.80584	7.23169e-14	5.24766e-11	2.91243e-17	-0.93	-0.92	-0.38
YCR090C	-4.97806	-0.409828	0.353821	7.23169e-14	0.803545	0.268459	0.53	0.78	0.53
VPS38	-3.93307	0.716006	0.975333	7.23169e-14	0.457817	1	0.585	0.3	0.52
NSA1	-1.79086	0.190404	-0.270117	7.91805e-14	0.508666	0.149923	-0.69	-0.3	-0.2
URB2	-3.38276	0.418498	-0.0705294	8.85506e-14	0.421609	4.71895e-05	-0.215	-0.17	-0.3
BTN2	-2.01682	-0.876737	-2.33646	1.01524e-13	0.000557223	0.112385	-2.07	-2.25	-1.86
MHT1	-2.8594	-3.52523	-4.55215	1.02963e-13	0.000141782	0.571909	0.465	0.48	0.38
NHP2	-2.00051	-0.837568	-0.896653	1.12102e-13	0.000102039	1.83464e-24	0.555	0.13	0.06
YOR342C	-2.39635	-0.876882	-0.862516	1.14176e-13	0.510206	0.476442	-0.365	-0.74	-0.04
UTP8	-2.50666	0.45961	-0.298162	1.59244e-13	0.0305652	0.00274379	-0.41	-0.37	-0.39
RPA190	-2.38516	-0.658783	-1.18715	1.66124e-13	0.484519	0.425295	-0.57	-0.2	-0.18
PXR1	-2.17217	-0.151129	0.299172	2.17939e-13	0.33967	0.948903	-0.39	0.06	0.18
NOG1	-2.08292	0.702021	-0.257592	2.22749e-13	0.0015301	6.3936e-15	-0.77	-0.34	-0.2
MET17	-2.36012	-4.0075	-4.85867	2.52181e-13	6.3931e-30	2.84041e-35	0.56	0.37	0.14
DAL5	-2.20187	-2.50712	-1.70923	2.69697e-13	0.00796639	0.00389184	-4.38	-2.56	-4.8	NCR
PMA2	1.94129	1.44281	0.306282	3.03935e-13	0.0150762	0.0246328	-3.22	-3.88	-3
GLC3	2.50141	-1.75134	-3.16229	3.31253e-13	0.176285	0.478178	-0.47	-0.41	-0.12
MRD1	-2.00649	0.324951	-0.302364	3.80929e-13	0.0172515	6.67153e-05	-0.27	-0.07	-0.26
RET1	-1.83317	-0.181292	-0.889561	3.83357e-13	0.74139	0.440522	-0.41	-0.33	-0.34
SAP185	-1.73476	0.111651	-0.289464	4.02784e-13	0.0286272	0.581158	-1.075	-0.45	-0.49
DBP10	-1.97264	-0.226349	-0.209061	4.29113e-13	2.37534e-31	2.9378e-54	-0.34	-0.25	-0.31
EMP46	1.89253	0.45104	-0.10918	4.78973e-13	1.1487e-11	1.89978e-06	-1.12	-0.65	-0.53
GLC7	-1.71041	-0.431646	-0.910756	5.23491e-13	2.43251e-06	0.408272	0.185	0.3	0.22
KEI1	-9.09352	-0.599049	0.226767	5.35719e-13	3.49055e-08	1.89348e-16	0.42	0.06	0.02
SPC1	-2.82142	0.158283	0.620564	5.59295e-13	0.338274	0.46362		0.16	0.22
PWP2	-2.24079	0.38048	-0.398021	6.03444e-13	0.572898	0.00314528		-0.08	-0.11
RNT1	-2.62299	0.605108	0.264275	7.51524e-13	0.847592	0.00977143		-0.65	-0.85
UTP22	-2.40979	-0.276111	-0.707863	8.0541e-13	0.743759	0.404264	-0.115	-0.51	-0.38
ICY2	-2.36802	-1.49975	-0.711969	8.49598e-13	0.50746	0.579734	0.39	-0.97	-0.76
PCL5	-2.3724	-0.104552	0.253286	8.55818e-13	0.316924	0.797825	-1.09	-1.25	-0.82
JJJ3	-3.62535	0.585386	0.921026	9.34832e-13	0.0964194	0.000455261		-0.59	-0.83
YOR309C	-3.10456	-1.90632	-1.57537	1.1158e-12	0.419529	0.704614	0.3	0.1	0.11
POP8	-5.01882	-0.0185777	1.06719	1.15491e-12	0.629084	0.0334702	0.815	0.47	-0.02
ESF1	-1.93699	0.205993	0.18017	1.18514e-12	0.28356	0.381991	0.12	0.05	0.01
YMR259C	-2.56811	-0.177392	-0.307969	1.2185e-12	0.03503	0.462582	0.415	0.03	0.04
YBR056W	1.61794	-0.896922	-0.963238	1.2699e-12	0.508165	0.0627788	-0.76	-0.06	-0.01
YJR096W	1.72627	1.05864	-0.224433	1.33035e-12	5.94593e-09	0.059954	-1.79	-1.45	-1.28
MET1	-2.73149	-2.86725	-3.88657	1.36577e-12	0.782898	0.514828	0.05	0.34	0.16
YER053C-A	-2.46443	-0.781205	-0.602679	1.38282e-12	0.0829057	0.00259761	1.12	-0.6	0.11
UTP30	-2.15911	0.465093	-0.0306784	1.55471e-12	1.67509e-07	0.000141344	-0.25	-0.31	-0.41
GAR1	-1.68116	-0.393044	-0.479752	1.56309e-12	0.993912	0.00123498	-0.04	0.06	0
YNL115C	1.54419	0.0780711	-0.838729	1.77558e-12	0.535326	0.664515	-1.785	-0.98	-0.92
YGK3	-2.07741	-0.998052	-0.96978	1.88361e-12	0.707781	0.491498	-2	-2.1	-2.09
SSE2	1.53916	0.242683	-0.848347	2.20963e-12	0.00188067	0.00431813	-2.03	-0.87	-0.74
RPF1	-1.6126	1.00702	0.585489	2.21738e-12	1.91857e-05	0.556841	-0.065	0.27	0.17
BER1	-3.02854	-0.0422164	-0.0723383	2.23097e-12	2.72876e-18	3.76843e-26	0.19	0.47	0.56
LIA1	-2.20533	-0.655191	-1.39466	2.37084e-12	0.00548731	0.247982	-0.66	-0.02	-0.06
GNP1	-2.40699	-2.155	-2.06601	2.4436e-12	0.0668253	0.994909		-0.43	0.42
YML018C	-2.20078	-1.49531	-2.12829	2.59305e-12	0.202474	0.117135	-0.845	-0.34	-0.38
FMP33	1.93168	-0.54554	-0.113109	2.74023e-12	0.846851	0.00091931	0.505	0.28	0.45
LSP1	1.92244	-0.551852	-1.13036	2.75814e-12	0.95384	0.19452	-0.635	-0.08	0.32
NUG1	-1.83278	0.464941	-0.601056	2.8379e-12	0.000203587	0.000866313	-0.735	-0.39	-0.41
YDR157W	-2.92126	-1.42513	-1.09453	3.26117e-12	0.49936	0.00669955		-0.58	-0.33
EBP2	-1.96227	0.1348	-0.0340029	3.59085e-12	1.88624e-05	0.0309675	-0.13	0.09	-0.03
RPC40	-1.86159	0.242938	-0.188286	3.62949e-12	0.963794	0.931077	6.93889e-18	0.17	-0.05
YLR345W	2.0215	0.0509856	-0.13751	3.72907e-12	0.0567127	0.000151435	-0.305	-0.43	-0.2
NCL1	-1.69276	-0.527265	-0.792641	4.03886e-12	5.39323e-13	2.35347e-09	-0.09	0.25	0.37
SPI1	1.80721	0.387196	-1.27804	4.50485e-12	4.87483e-05	1.31178e-08	1.205	-0.62	-0.07
SED1	1.54301	1.69672	1.27359	4.70394e-12	0.211107	0.886278	0.365	-1.32	-0.32
VMA7	-1.74844	-0.0985791	-0.611487	4.77098e-12	0.0735624	0.000505742	0.815	0.82	0.78
DAS2	-2.10974	0.831649	0.657703	5.63073e-12	0.075906	0.0473207	-0.34	0.11	-0.05
DYN3	-2.54868	0.0917913	-0.348618	5.74975e-12	0.000199478	0.00642017		0.02	0.24
FCF2	-1.80378	0.372548	0.328757	5.74975e-12	0.697175	0.954089	0.35	0.11	-0.07
NQM1	1.71141	1.50325	-0.409442	6.11136e-12	0.4159	0.631135	-3.05	-3.52	-1.94
YBR241C	1.63503	0.644099	-0.222686	6.14941e-12	0.881636	0.671846	-0.645	-0.4	-0.53
MXR1	-3.32965	-1.56999	-1.82364	6.35118e-12	0.0666045	0.00968266	0.345	0.32	-0.19
RRP36	-1.80937	0.933697	0.491509	6.40671e-12	0.177515	3.31852e-06	-0.07	-0.06	-0.11
YDR179W-A	-6.12373	0.332465	0.190684	6.55114e-12	1.20766e-14	1.72716e-06	-0.055	-0.16	-0.25
GRE3	1.93384	-1.13392	-1.34945	6.62667e-12	0.785058	0.0483	-0.18	-0.34	0.14
TSL1	2.02083	-2.90222	-3.75364	7.09531e-12	0.000193744	0.0316768	-0.965	-1.1	-0.56
MDG1	1.51062	0.519007	0.221348	7.41324e-12	0.800453	0.40655	-0.7	-0.53	-0.21
GIM4	-2.51101	-0.926703	-0.38624	7.83993e-12	0.148263	0.261606	0.71	0.7	0.59
MNN4	-1.72577	-2.36812	-3.28378	9.85202e-12	2.23833e-08	0.348765	-1.42	-1.15	-1.1
RLP24	-1.6592	0.691758	0.412103	1.04246e-11	0.0145281	0.568554	-0.4	-0.09	-0.08
UGP1	1.62666	-1.20264	-1.27622	1.13548e-11	6.23786e-12	1.79013e-12	-0.11	-0.21	0.14
DIP2	-1.78859	0.229571	-0.310876	1.14642e-11	6.69484e-06	0.105102	-0.7	-0.18	-0.24
AGP3	-2.0388	-2.56026	-3.1176	1.16831e-11	0.390052	0.689025	-2.19	-1.43	-1.38
ERV14	-4.5507	-0.0571858	1.56306	1.24226e-11	1.97642e-05	1.52676e-06	-0.435	-0.15	-0.09
PUS1	-1.65577	0.0509355	-0.290683	1.42617e-11	7.98625e-17	6.36152e-19	-0.545	-0.39	-0.3
YGR122W	1.46297	0.541414	0.43553	1.49125e-11	0.0282905	0.528718	1.33	0.77	1.11
TRM11	-2.5796	-0.14417	-0.236643	1.74118e-11	0.00515972	0.286115	-0.78	-0.11	-0.33
RRT14	-1.84309	0.324787	0.240803	1.82157e-11	1.53718e-15	9.2609e-22		0.26	0.17
GIP2	1.93996	-0.99642	-2.45062	2.043e-11	0.0119709	0.176393		-1.13	-0.5
RKM4	-2.15332	-0.0235419	-0.397775	2.34482e-11	1.17371e-06	3.47818e-06	-0.06	0.32	0.16
YKL091C	1.84854	-0.952668	-0.893308	2.36938e-11	0.506298	0.495855	-0.255	-0.06	0.22
YKL151C	1.44845	-0.03381	-0.559694	2.37838e-11	1.71307e-16	2.45233e-18	-1.675	-0.85	-0.82
SUP45	-2.00517	-0.746509	-0.933567	2.45098e-11	0.980227	0.000350686	-0.305	0.04	0.15
RLI1	-2.08949	-0.388827	-1.03313	2.96487e-11	0.889019	0.465946	0.155	-0.21	-0.06
COG5	-3.40703	0.681274	0.689021	2.96493e-11	0.0313807	0.126202	0.18	0.11	0.19
LEU9	-1.42335	-1.14287	-1.59791	3.086e-11	0.783296	0.636859	0.805	-0.16	0.29
HSP42	1.96984	-0.0438187	-2.43144	3.19567e-11	0.295366	0.547696	-2.1	-1.11	-0.94
NRP1	-1.68186	0.488291	-0.155365	3.31694e-11	0.00177045	3.55009e-09	-0.22	-0.02	-0.16
CNM67	-2.20869	-0.645228	-0.269963	3.64484e-11	0.997486	0.217336	0.365	0.28	0.21
FUS3	1.50888	2.5608	1.29969	3.66247e-11	0.00157486	0.0140452	0.495	1.36	1.17
RPL13A	-1.4404	-1.16267	-1.21797	3.82837e-11	0.920067	0.0364249	0.12	-0.13	-0.12
RPL30	-2.13832	-1.02508	-0.851901	4.26485e-11	0.0120583	0.00237697	-0.065	0.19	-0.07
YMR196W	1.7949	-0.533955	-2.05542	4.39922e-11	0.349243	0.00709313	-2.01	-1.21	-0.92
SHE2	-1.94204	0.503333	0.585332	4.39922e-11	0.0319612	0.0506761	0.28	0.3	0.36
CCE1	-3.08527	0.729146	0.355865	4.39922e-11	0.000110087	1.34138e-05	0.655	0.58	0.48
LOS1	-1.84184	-0.694285	-0.572972	4.51718e-11	1.51827e-07	1.69828e-10	-0.165	-0.2	-0.11
GRE2	1.57403	0.0948274	-0.706509	4.55726e-11	0.933786	4.32929e-10	-1.005	-1.19	-0.42
GPA1	1.48675	1.92606	1.02086	4.66325e-11	0.0844389	0.744106	1.235	1.18	0.91
YMC2	-1.72432	0.589333	0.931832	4.95077e-11	0.0125775	0.404955	-0.3	-0.2	-0.66
YTM1	-1.63367	0.609758	0.392394	5.15588e-11	7.69239e-29	4.41205e-08	-0.675	0.24	0
PSK2	-1.5924	-0.30427	-0.402206	5.22033e-11	7.00067e-07	4.56662e-06	-0.13	-0.28	-0.42
UTP25	-2.07946	0.839599	0.0706493	5.8578e-11	0.000190036	0.00754013		-0.38	-0.46
RRP5	-1.89037	-0.180778	-0.376475	6.85411e-11	0.0965973	8.43058e-15	-0.34	-0.02	-0.08
TIM18	-3.69729	-0.483975	0.781509	7.14702e-11	0.0392539	0.0206134	0.225	-0.43	-0.2
PBI2	1.54732	0.647292	0.729672	7.40988e-11	0.0137619	0.383771	0.32	0.59	0.45
ATC1	-3.64393	1.04311	0.0227814	8.81032e-11	0.0290814	0.100567		-0.93	-0.8
TIM11	1.77735	0.516597	1.00624	9.52954e-11	0.780502	0.00607716	0.475	1.03	0.71
AGE1	-2.11024	0.369657	0.512037	9.68148e-11	4.27408e-19	3.45692e-05	-0.51	-0.38	-0.21
NAN1	-1.75954	0.55091	-0.0722586	9.99721e-11	0.00807225	4.21502e-05	-0.685	-0.27	-0.46
URA1	-1.45922	-0.27644	-0.458841	1.0675e-10	0.0108296	0.160353	0.295	0.41	0.44
TMA17	1.85329	0.10459	0.47711	1.07536e-10	0.217654	0.13883	-0.855	-0.89	-0.49
CCP1	1.47251	0.436749	-0.0922834	1.07819e-10	0.0122086	0.893417	0.525	0.46	0.38
HSP30	-1.57965	-1.63444	-2.66836	1.3398e-10	0.59991	0.346903	-2.58	-3.57	-3.57
PRP42	-5.41972	0.35085	0.341548	1.42322e-10	0.341166	0.0651938	0.31	0.09	0.12
MDH2	1.45855	0.443438	0.0274892	1.5619e-10	0.00911224	0.00896744	-1.9	-1.16	-0.77
RNY1	1.48502	-1.09019	-0.740978	1.70129e-10	0.00299741	0.963846	-1.535	-0.8	-0.55
NOC3	-1.54925	0.738528	0.188112	1.74105e-10	0.0555953	0.000284418	-0.12	-0.14	-0.18
NSE5	-1.85878	0.59736	-0.144187	1.90294e-10	0.176658	0.110253	0.455	-0.35	-0.22
YOR289W	1.98826	0.109482	0.671237	1.90399e-10	0.067598	0.902981	-0.635	0.39	0.26
DHR2	-2.97336	0.488034	0.192765	1.96171e-10	0.341469	0.116438	-0.06	-0.16	-0.37
RRB1	-1.72481	0.237825	-0.648017	2.069e-10	0.828581	0.243984	-0.77	0.14	-0.08
FUS1	2.47807	3.71317	2.18574	2.09172e-10	0.0826046	0.803057		4.38	3.82
NOB1	-1.63965	0.364889	-0.157695	2.0939e-10	4.65839e-10	2.8918e-20	-0.715	-0.07	-0.3
ADI1	-1.68617	-2.00626	-1.92629	2.10798e-10	0.452419	0.491578	0.29	0.32	0.14
TOM7	-6.4685	-0.121636	1.29618	2.12388e-10	0.0622059	0.965715	1.235	0.48	0.69
YFL042C	1.50558	0.414456	0.595746	2.12432e-10	0.00026105	0.0733455		-0.38	-0.41
TPS2	1.83973	-1.58606	-2.08841	2.33504e-10	0.002134	0.634243	-1.14	-1.23	-0.62
GRC3	-1.71127	0.734616	0.241876	2.4285e-10	0.0209927	0.756055		-0.36	-0.46
NPA3	-1.4234	-0.426871	-0.939797	2.44772e-10	1	0.256293	-0.74	-0.2	-0.37
HXT2	-3.92172	-3.4723	-4.29782	2.48779e-10	0.196718	0.701779	-0.565	-1.74	-1.35
YNR021W	-1.8399	-0.901417	-1.36005	2.57012e-10	0.471609	0.0962858	0.05	-0.23	-0.08
DUS3	-1.7851	0.903464	-0.217477	2.64987e-10	4.8329e-37	1.49701e-09		-0.18	-0.47
WSC4	1.78069	2.23171	1.77655	2.83348e-10	0.161743	0.671987	1.22	0.52	0.66
YJR003C	-2.75845	0.0573166	0.00336154	2.8695e-10	6.20949e-16	4.19945e-12		0.62	0.64
RPA14	-1.59867	-0.450143	-0.572702	2.97059e-10	0.904548	0.0136731	-0.715	-0.67	-0.42
TRM1	-1.56159	0.037573	-0.18033	3.11538e-10	0.143532	0.03881	-0.05	0.48	0.25
YOR169C	-2.84615	-0.834887	0.503388	3.12186e-10	9.46376e-07	1.51151e-09	0.46	0.22	-0.13
RIO1	-1.93766	-0.111783	-0.262143	3.25171e-10	0.000772927	0.408272	-0.99	-0.84	-0.68
FMP21	1.40293	-0.0376277	0.0996911	3.35722e-10	0.108877	0.00125169	-0.98	-0.25	-0.11
FMO1	-1.57639	-2.72124	-2.59081	3.7129e-10	5.45995e-07	2.78533e-09	-1.945	-0.95	-0.79
ALD3	1.45605	0.528038	-1.31492	3.73851e-10	0.000333904	7.5918e-08	-2.42	-3.33	-2.27
ARO7	-2.15124	-0.749228	-0.541605	3.85752e-10	0.000352141	0.635803		-0.54	-0.55
GCD1	-1.37395	-0.104167	-0.568897	3.93277e-10	3.83127e-16	3.29019e-09	-0.3	0.22	0.28
NDE2	1.65058	0.130853	-1.33363	4.04797e-10	0.830425	0.984879		-1.78	-0.99
YBL028C	-2.03941	0.261586	-0.0807892	4.1166e-10	0.0977823	0.170873		-0.5	-0.63
STO1	-3.05333	0.00985366	0.0306851	4.22387e-10	0.917787	0.687023	0.09	0.15	0.2
YKL105C	1.37819	0.344255	0.287468	4.71356e-10	0.0150598	0.189017	-1.32	-0.58	-0.53
UTP11	-1.61589	0.918368	0.696389	4.9408e-10	0.829406	0.559689	-0.585	-0.28	-0.55
STN1	-2.05125	0.708129	0.704818	4.95846e-10	0.912094	0.806463	0.18	0	-0.22
TBS1	-1.85044	-1.31748	-1.1038	5.10319e-10	2.48922e-21	5.17151e-19	-1.095	-0.76	-0.87
ATM1	-1.46669	-0.154499	-0.467603	5.22019e-10	0.105822	0.000169091	-0.695	0.08	-0.08
FCY2	-1.52294	-0.308565	-0.556927	5.29619e-10	0.0185196	0.134014	-1.77	-1.3	-1.76
AIM3	1.4757	0.210771	0.0213265	5.38392e-10	0.760677	0.0349043		-0.41	-0.38
LAA1	-1.90576	-0.83451	-0.902381	5.52849e-10	3.96571e-05	0.000140538	-0.26	-0.33	-0.29
NOP2	-1.5264	0.787583	0.0621791	6.02897e-10	0.808229	0.000246942	-0.485	-0.33	-0.37
DUG3	-1.818	-1.4747	-2.23479	6.6448e-10	0.457253	0.897794	-0.13	-0.28	-0.14
HSH49	-3.99237	0.428502	0.775664	7.54857e-10	0.982174	0.949143		-0.18	-0.09
YHR097C	1.46242	0.268067	-0.277973	8.6747e-10	0.164802	0.308402	-1.25	-1.22	-0.65
EMI5	1.48375	0.65763	1.01867	9.05615e-10	4.39229e-05	0.00636878	0.12	-0.22	-0.06
ATG33	1.3784	0.118945	0.377487	9.51816e-10	0.00522272	0.0125056	-0.485	-0.97	-0.63
MRT4	-2.05322	1.03639	0.578989	9.62771e-10	1.74349e-05	0.000525551	-0.05	0.06	0.01
BAS1	-1.62403	-0.194999	-0.198075	9.98505e-10	0.628411	0.122966	-0.24	0.07	-0.17
RPS25B	-3.31026	0.268674	-1.60454	1.01709e-09	0.369996	0.0876059	0.1	0.13	0.04
ATR1	-1.65372	0.275856	0.335704	1.02471e-09	0.482888	0.99115	0.065	-0.37	-0.23
MET32	-3.10705	-2.84602	-3.14565	1.13931e-09	0.473488	0.785656	0.31	-0.08	-0.06
OSH2	1.36968	-1.00021	-1.28774	1.20102e-09	0.0213353	0.0172594	-0.85	-0.5	-0.33
DTD1	-2.38214	-0.514049	-0.0181956	1.20102e-09	0.867451	0.394539	0.76	0.64	0.49
NOP12	-1.52417	0.848197	0.114023	1.34286e-09	0.0025597	0.893417	-0.425	-0.35	-0.31
MET13	-1.68686	-2.21841	-2.00071	1.4283e-09	1.77166e-07	3.73281e-12	0.1	-0.65	-0.56
RPA43	-1.61032	0.270656	0.134224	1.50633e-09	0.284896	0.0520169		0.08	0.02
KAP123	-1.6349	-0.0721492	-0.405974	1.54983e-09	0.377552	0.434359	0.25	0.04	-0.13
HRD3	1.25666	0.780013	0.669886	1.7264e-09	0.0137166	0.000219958	-0.89	-0.41	-0.38
NCS2	-3.64944	0.203783	0.0826835	1.82339e-09	0.753151	0.237379	-0.66	-0.16	-0.3
DAL80	-2.47189	-3.55686	-2.13147	1.87401e-09	0.000281505	0.0814646	-3.83	-3.3	-3.59	NCR
PPT1	-1.90286	0.624349	-0.487029	2.25466e-09	0.625568	0.652371	0.27	0.16	0.17
VPS9	-1.55653	-0.681678	-0.0622126	2.26589e-09	0.452032	0.00131273		0.29	0.32
YAT1	-1.70906	-1.70175	-1.53739	2.36352e-09	0.300187	0.230949	0.425	-0.05	-0.03
ATG19	1.4237	-0.178456	-0.486818	2.4101e-09	0.129097	0.504082	-0.48	-0.28	-0.25
RPS27A	-1.56653	-0.637429	-0.625193	2.51874e-09	1.11076e-08	3.42278e-09	-0.925	-0.74	-0.67
YMR090W	1.68015	0.847382	-0.00418589	2.51874e-09	9.5717e-06	1.14149e-06	-1.27	-1.46	-0.52
ILM1	-4.09151	-0.43148	0.800641	2.65409e-09	0.105063	1	1.06	0.56	0.43
RPS17B	-1.91287	-0.746008	-0.457459	2.68817e-09	0.00207009	0.778826	0.21	0.53	0.32
NOP15	-1.25512	1.0837	0.941668	2.75988e-09	3.9594e-14	1.38367e-10	0.155	-0.28	-0.29
VPH2	-4.01066	0.251644	0.528882	2.92726e-09	0.338274	0.70258	0.84	0.72	0.79
THI80	-2.43154	-0.507188	-0.550729	2.9316e-09	0.846909	0.212303		-0.12	-0.25
MDM1	-1.6748	0.083175	0.061602	2.96366e-09	0.000285783	0.00602207	0.045	-0.19	-0.21
RAD59	-1.87498	-3.19372	-3.75547	3.04898e-09	0.646259	0.870164	-0.005	0.09	-0.01
GND2	1.33609	1.20535	-0.243656	3.26048e-09	8.78716e-13	1.29967e-05	-3.77	-2.39	-1.67
SLY41	-1.98343	-0.963219	-1.59365	3.34755e-09	0.010494	0.148541	-0.025	-0.21	-0.23
MMF1	1.31933	-0.357977	-0.0552215	3.38266e-09	0.00677766	0.901421	0.825	0.39	0.53
RPL18B	-1.46527	-1.64881	-1.44461	3.39019e-09	1.16518e-09	2.4524e-07	-0.5	0.18	0.06
BCY1	1.37558	-0.0177717	-0.817496	3.44192e-09	0.552851	0.16091	-0.56	-0.3	-0.07
BUD23	-1.59785	0.235494	-0.304911	3.537e-09	0.017094	0.0315745	-1.56	-0.64	-0.83
CAB2	-1.42948	-0.116567	-0.483709	3.58082e-09	0.00291163	0.985463	-0.02	0.17	0.2
PKP2	-2.47677	0.140451	0.955795	3.96057e-09	0.310864	0.101462	-0.21	-0.41	-0.3
ISN1	1.38175	0.348224	0.127913	4.00973e-09	0.00507654	0.118238	-0.16	0.44	0.38
YJR111C	-1.69468	0.948377	1.51858	4.01958e-09	1.85009e-06	0.000167944		0.02	0.23
MKT1	-1.35315	-0.112501	-0.528247	4.16175e-09	0.512792	0.240592	-0.17	0.47	0.21
TSR1	-1.4602	0.585825	-0.14063	4.18372e-09	0.154399	0.12643	-0.47	-0.28	-0.38
MSB2	1.37716	1.20031	1.05914	4.22904e-09	0.772228	0.847434	0.935	0.39	0.52
YOR283W	-1.53303	-0.120258	-0.165871	4.2441e-09	3.64096e-23	3.2409e-27	-0.735	-0.45	-0.47
ATH1	1.30889	-0.611737	-1.35983	4.42115e-09	2.23231e-05	0.503054	-0.925	-1.04	-0.78
YCT1	-1.99064	-4.14575	-5.3311	4.55885e-09	0.000352141	5.29675e-10	-1.165	-1.14	-0.91
SAD1	-1.99739	-0.154373	-0.31436	4.66247e-09	0.194317	0.895307		0.45	0.35
YIL055C	1.4341	-0.123905	-0.610154	4.68522e-09	1.16048e-09	3.52072e-07	-1.49	-1.22	-0.6
GRX2	1.44564	-0.565366	-0.350779	4.7976e-09	0.961746	0.00126436	0.02	-0.11	0.18
YDR370C	-2.10118	0.526508	-0.0680709	4.85197e-09	0.43616	0.465946	0.665	0.5	0.49
OCA4	-1.97827	0.551167	0.795081	4.92425e-09	0.745129	0.0786185	0.405	0.32	0.2
TRM8	-1.44566	-0.18642	-0.99263	5.40452e-09	0.689402	0.000533083	-0.675	-0.27	-0.17
HOM6	-1.75091	-0.915547	-0.844407	5.72499e-09	0.22979	0.777637	0.58	0.41	0.14
EXO5	-1.51288	-0.0241383	0.0723543	6.29352e-09	1.91136e-05	8.25407e-12	-0.41	-0.31	-0.32
MEP2	1.71371	0.683855	0.588641	6.35072e-09	0.728496	0.0594727	0.435	1.69	1.16	NCR
ETR1	1.24854	0.0281575	-0.848233	6.78332e-09	0.0386805	0.754185	-0.41	0.46	0.39
GLK1	1.37171	-2.84733	-4.02207	6.78715e-09	1.24268e-07	2.95934e-05	-0.735	-0.46	-0.35
GFD2	-2.54952	-0.508847	-1.74987	6.96385e-09	0.724897	0.619538		-1.39	-1.36
PRP4	1.59203	1.1959	1.4111	7.23947e-09	0.0115075	3.92912e-07	0.14	0.39	0.24
STF2	1.77227	-2.72005	-2.5167	7.32647e-09	2.4791e-41	1.80841e-55	-0.14	-0.02	0.37
FUN30	-1.34228	-0.0507659	-0.587484	7.52016e-09	0.648414	0.345911	-0.95	-0.72	-0.7
MET7	-1.36478	0.293656	0.0291189	7.60753e-09	0.769549	0.0717307	0.08	0.26	0.2
RFU1	-2.07171	0.136841	-0.671701	7.63992e-09	0.0224265	0.238478		-1.15	-1
FAF1	-1.48242	1.1741	0.970381	7.76298e-09	0.04138	0.891141	-0.07	-0.03	-0.04
PEX2	1.40064	0.481008	0.196874	7.85872e-09	0.0738231	0.00403911	2.11	1.92	1.71
DAL4	2.56707	1.7746	2.31382	7.88227e-09	0.523573	0.000775834	-0.79	0.74	-1.48	NCR
LSB3	1.26249	0.107294	0.240184	8.74028e-09	0.000681133	0.00534562	0.215	0.49	0.55
RRP3	-1.37047	0.303881	-0.0486434	8.82016e-09	0.933786	0.849918	-0.28	0.17	-0.04
UTP5	-1.62455	0.645441	-0.0460997	9.20774e-09	0.0455343	0.109141	-0.99	-0.57	-0.72
VHT1	-1.41289	-1.04272	-1.15236	9.84407e-09	0.994115	0.00124951	0.65	0.09	-0.2
LHP1	-1.58616	0.0175075	-0.344907	1.03731e-08	6.77426e-25	3.99018e-32	-0.16	0.17	0.01
OM14	1.21648	-0.472664	-0.447755	1.03731e-08	0.217654	0.00098186	0.095	-0.43	-0.06
RPL31B	-1.51508	-0.870374	-1.24896	1.0748e-08	2.60555e-06	8.94228e-08	0.45	0.2	0.19
YJL193W	-2.25119	0.442443	-0.143149	1.07484e-08	1.52739e-14	4.32712e-11	0.265	-0.39	-0.4
GDH3	1.3395	2.55944	1.56566	1.11936e-08	0.912657	0.0613098	0.075	2.41	0.84	NCR
RRP1	-1.72973	0.688899	0.671354	1.28449e-08	0.223223	0.960004	-0.49	-0.02	-0.26
YBR287W	-1.34617	-1.92783	-2.24326	1.32423e-08	0.804122	0.138465	-0.41	-1.88	-1.75
IFH1	-1.62606	-0.289192	-0.445771	1.39557e-08	8.63922e-07	0.000853273	0.075	-0.28	-0.28
CSI1	-7.28789	0.833163	1.0382	1.39557e-08	0.0836099	0.582165	0.48	0.38	0.32
CKI1	1.27647	0.900756	1.02346	1.3972e-08	5.02388e-06	3.35855e-10	-0.545	0.58	0.38
HST1	-1.3511	-0.376982	-0.557065	1.3972e-08	0.766177	0.440084	-0.19	-0.07	0.03
HIS7	-1.24057	-0.994903	-0.610041	1.74242e-08	0.217654	0.900616	-0.75	0.14	-0.16
MIG1	1.34473	0.57124	-0.175419	1.75948e-08	0.0280677	0.962359	-0.8	-0.8	-0.44
TUL1	1.55052	0.623416	0.849424	1.83117e-08	7.52009e-05	8.2907e-05	0.17	-0.4	-0.28
YHR020W	-1.40001	-0.807941	-1.32742	1.84582e-08	0.962125	0.377622	-0.065	-0.42	-0.27
TPS1	1.49313	-2.05882	-2.34946	1.99076e-08	0.055984	0.101355	-0.395	-0.17	0.19
ARP9	-2.34874	0.356992	0.158359	2.0244e-08	0.000741061	4.08447e-06	0.505	0.49	0.42
ERO1	-1.55217	-0.0169027	-0.328062	2.10716e-08	0.17007	0.814879	-0.84	-0.36	-0.49
ASR1	1.7289	1.36892	1.72505	2.12765e-08	6.87136e-25	1.96097e-09	-0.305	0.03	-0.16
ENP1	-1.39899	1.27231	0.532568	2.13591e-08	0.00243601	0.00442539	-0.64	-0.27	-0.33
YDL023C	1.84875	-0.612212	-1.79882	2.20502e-08	1.93144e-16	7.8302e-18	0.25	-0.01	0.5
RGC1	1.27883	0.779165	0.328596	2.20502e-08	0.465408	0.254891	-0.52	0.23	0.14
AHA1	1.31212	0.0525395	-0.517965	2.2464e-08	0.0691388	0.0395104	-1.165	-0.35	-0.28
CPA1	-1.27044	-1.9672	-1.34407	2.39392e-08	0.00019037	5.35853e-05	-0.62	-1.43	-0.83
SSU1	-1.61521	-0.89909	0.210507	2.40978e-08	0.115827	0.0284116	-0.845	-1.34	-1.07
LCL1	-1.50208	-1.12028	-1.43183	2.43361e-08	1.18702e-05	0.0218551	-0.28	-0.42	-0.12
CHO2	-1.64903	-0.822687	-0.846402	2.6016e-08	0.0410932	0.640111	0.06	-0.36	-0.51
YOL163W	-2.05605	-2.87475	-2.56396	2.7594e-08	0.00373538	0.000473084	-0.8	-0.91	-1
YPL247C	1.40769	-1.22318	-1.60292	2.93764e-08	0.0015301	3.57849e-07	0.12	-0.38	-0.03
UBX5	1.42575	-0.0411373	-0.121417	3.07123e-08	4.70654e-13	3.49241e-13	-0.745	-0.24	-0.17
ATG2	1.17502	0.110595	0.422967	3.09194e-08	0.11462	0.585063	-1.405	-0.87	-0.85
IRA1	-1.41035	-0.260278	-0.448252	3.13285e-08	0.976017	0.272765	-0.33	-0.63	-0.52
STF1	1.44665	-0.699655	-1.40035	3.27044e-08	4.68919e-08	1.103e-12	0.335	0.1	0.32
YPR127W	1.35428	1.2829	-0.0925201	3.39385e-08	3.88603e-07	0.10811	-1.05	-1.13	-0.97
ENA1	-3.19369	-4.72383	-3.33917	3.42688e-08	0.10135	3.74541e-05	-2.27	-2.24	-2.19
SXM1	-1.37122	-0.326586	-1.10081	3.42688e-08	0.000450888	0.236805	0.1	-0.12	-0.08
URE2	-1.17917	-0.18359	0.0485893	3.5623e-08	0.902369	0.0472457	-0.07	0.03	0.07
TPK2	1.34516	-0.659415	-0.897212	3.71805e-08	3.17556e-15	4.30245e-07	-0.6	-0.22	-0.03
YHR080C	1.31488	0.0864146	0.000652689	3.94131e-08	0.000102943	0.464197	-0.695	-0.41	-0.38
YDR090C	-1.27727	-1.15163	-0.796861	4.02671e-08	0.00133067	2.4902e-07	-1.39	-0.68	-1.34
RPL1B	-1.3332	-0.867575	-0.932835	4.21624e-08	0.00303397	0.00692653	0.85	0.6	0.53
BUD22	-1.50083	-0.0756933	0.123357	4.25647e-08	2.31141e-13	8.2098e-11	-0.31	-0.03	-0.14
BNA3	-1.44171	-2.76716	-3.70366	4.3843e-08	2.10512e-06	3.5749e-08	-0.425	-0.79	-0.84
YMR086W	1.28637	0.372033	0.24207	4.49657e-08	0.896207	0.775583	-1.56	-0.9	-0.89
YGR017W	-1.69084	-0.175268	0.15563	4.58914e-08	0.792749	0.176912	0.285	0.39	0.51
AIM41	1.36666	0.369992	-0.202499	4.99354e-08	0.469	0.199175	-0.245	0.12	0.26
RRN11	-2.14039	0.261759	-0.631927	5.08684e-08	0.012351	1.0362e-06	-0.38	-0.04	-0.3
SPC110	-1.22768	-0.246164	0.245236	5.23502e-08	1.1589e-07	0.880344	0.1	0.24	0.13
BUD27	-1.3199	0.833137	0.583405	5.33142e-08	3.1866e-12	7.04627e-09		-0.21	-0.49
DOM34	-2.11205	-0.21067	-0.144715	5.49842e-08	0.310498	0.000129802	0.69	0.63	0.59
YLR040C	1.62076	2.78109	2.13434	5.56147e-08	0.517596	0.893165	2.04	-0.08	0.64
IES2	1.28142	0.893287	1.52871	5.68762e-08	0.0133498	0.00709313	-0.145	0.22	0.28
YLR455W	-1.45296	-0.212333	-0.0270259	5.7665e-08	0.812554	1	0.01	-0.17	0.06
DBP1	1.33265	0.310941	-0.286145	5.76869e-08	5.0419e-06	0.00282362		-1.12	-0.88
YGR130C	1.32037	-0.502267	-0.802055	5.86832e-08	0.00074061	0.00217757	-0.49	-0.47	-0.19
BCD1	-1.75313	1.01646	0.0869935	5.98962e-08	0.88134	0.762834	-1.42	-0.79	-0.93
IMP4	-1.51821	0.54613	0.377717	6.13207e-08	2.71978e-25	1.89395e-37	-0.205	0.28	0.16
PAN5	-1.77101	-0.293957	-0.437246	6.47415e-08	0.169441	0.445576	-0.245	0.03	-0.12
FUN12	-1.32808	-1.02346	-1.10935	6.67993e-08	0.625442	0.662098	0.06	-0.26	-0.25
UTP20	-1.88185	-0.314224	-0.414765	6.84205e-08	0.173036	0.557006	-0.19	-0.23	-0.24
YML096W	-1.91115	0.191504	-0.265254	7.06729e-08	0.477282	0.132545	-0.01	0.45	0.09
IMP2'	1.15132	1.20109	0.157529	7.16931e-08	0.386213	0.464256	-0.825	-0.43	-0.4
MUD1	-1.46158	-0.877644	-1.02877	7.54192e-08	0.00016166	0.0521489	0.19	-0.28	0.02
COX5A	1.27055	0.181423	0.0180476	7.74722e-08	0.55264	0.774835	0.805	0.66	0.33
SIP2	1.42595	0.110206	0.0340368	7.87469e-08	2.91836e-34	5.2228e-16	-0.725	-0.21	-0.12
MET14	-2.23404	-4.03993	-4.94159	8.38098e-08	0.000352141	2.43307e-09	0.69	0.83	0.56
YGR066C	1.30982	-0.0787152	-0.394522	8.49659e-08	0.403342	0.967796		-2.21	-1.23
YKR033C	-2.62374	-2.96969	-2.49164	8.62572e-08	0.271534	0.505272	0.52	-2.38	-2.38
SOD2	1.26301	-0.112758	-0.860267	8.85359e-08	0.0789235	0.012546	-1.44	-0.62	-0.57
YMR141C	-4.1082	-1.18971	0.405936	8.86756e-08	5.69896e-05	0.839552	0.45	0.07	0.01
PMS1	-1.53764	-0.198981	0.438245	9.21064e-08	0.0367912	0.216267	0.01	-0.19	-0.3
PNO1	-1.24869	0.452801	-0.0882003	9.30001e-08	0.292948	0.120713	-1.065	-0.43	-0.47
MMT1	-1.45088	0.185465	0.538723	9.44955e-08	0.000137295	8.32108e-05		0.57	0.44
GLO2	1.187	0.406957	0.0324731	9.86897e-08	0.309497	0.19897	-0.01	0.22	-0.06
MFB1	-2.1159	-0.577375	0.0644412	1.01193e-07	0.554926	0.551759	-0.06	-0.09	-0.08
YVH1	-1.36446	0.421234	0.34004	1.02446e-07	2.20647e-07	0.64274	-0.88	0.01	-0.18
KAP120	-1.56329	0.31898	0.349531	1.04447e-07	0.00131558	0.000245496	-0.425	-0.11	-0.02
YGR016W	-7.36453	0.225252	0.630357	1.06962e-07	0.564166	0.975996	0.31	0.2	0.18
NTH2	1.1681	-0.104935	0.331777	1.09836e-07	0.746753	0.975586	-0.105	0.06	0.21
PUT4	1.56017	-0.367098	-0.719864	1.21035e-07	4.80362e-39	4.5732e-52	-0.76	-0.68	-0.66	NCR
AIM10	1.58146	0.642414	0.0394966	1.21047e-07	0.808893	0.353466	0.49	0.42	0.25
PRX1	1.23177	-0.186253	-1.5948	1.21047e-07	9.80586e-08	7.66311e-06	-0.63	-0.85	-0.45
YLR177W	1.3193	-1.49958	-1.68388	1.24329e-07	0.730797	0.000965103	0.595	-0.07	0.2
DDP1	1.32586	0.882939	1.04898	1.29548e-07	0.0149746	0.382196	0.71	0.01	0.26
YGR283C	-2.17431	0.238069	-0.403417	1.29723e-07	0.562261	0.113112	-0.13	-0.35	-0.51
HEM15	1.2425	-0.146502	-0.165641	1.30469e-07	0.0599904	0.82574	0.245	0.49	0.46
SIS1	1.61018	0.276054	-0.1837	1.32635e-07	0.556258	0.0280753	-0.97	-0.36	-0.38
RPS22B	-1.63931	-0.363005	-0.648139	1.39197e-07	0.0961357	0.948565	1.125	0.52	0.61
LSM4	-1.64935	0.88948	1.09362	1.48881e-07	0.0172515	0.869189	1.12	0.39	0.61
AIM19	1.6515	-0.370476	0.263765	1.51142e-07	0.0765459	0.239429	0.31	-0.34	-0.24
FAL1	-2.87619	0.901868	0.141174	1.70884e-07	0.24261	0.228892		-0.16	-0.3
TIS11	-1.30078	-1.48307	-1.72517	1.71755e-07	0.62192	0.202124	1.33	-1.07	-1.37
EMI2	1.51066	-1.67266	-2.18208	1.74977e-07	0.724017	0.240577	0.72	0.5	0.65
YJR149W	1.47631	1.30724	0.748822	1.80891e-07	0.345285	0.0523823		-0.02	-0.18
YPR097W	-1.39665	0.278414	0.27736	1.8347e-07	0.100317	1	6.93889e-18	0.12	0
RSA4	-2.02404	0.724893	-0.0147282	1.84596e-07	0.481053	1.11735e-09		-0.32	-0.4
POR1	1.26014	-0.365497	0.0288612	1.91161e-07	1.80395e-06	1.16708e-06	0.52	0.52	0.12
MTH1	1.21035	-1.15029	-2.02017	1.94592e-07	0.000318527	6.99514e-05	-1.03	-0.33	-0.25
PRP38	-2.44731	0.534314	0.982743	2.17735e-07	0.453507	0.35923		0	-0.01
AKL1	1.22538	-0.0661879	0.171229	2.35234e-07	0.609659	0.626768	-0.615	-0.56	-0.39
RRP6	-1.25422	-0.204973	-0.310366	2.41884e-07	0.436879	0.662081	-0.51	-0.15	-0.17
POL5	-1.23038	0.199097	0.3137	2.47238e-07	0.218041	0.0280801	-0.8	-0.01	-0.18
HSP104	1.45969	-0.225701	-2.42656	2.59376e-07	0.00440264	0.000423411	-2.005	-1.39	-1.27
FMP40	1.33082	0.267482	-0.623073	2.60152e-07	0.244201	0.488886	-1.34	-1.03	-0.88
INO1	-1.64332	-0.456207	-0.197763	2.71821e-07	0.0306279	0.818773	-0.6	-2.28	-1.78
YKR018C	1.16394	0.226611	-0.319331	2.72944e-07	6.74722e-10	1.51693e-10	-1.02	-0.42	-0.45
PPE1	1.27525	0.595624	0.69169	2.74545e-07	3.26176e-07	3.73994e-08	-0.405	-0.33	-0.14
ARN1	-1.26258	-0.312167	-0.672538	2.76685e-07	5.61519e-07	0.0231622	2.83	0.02	-0.21
SFG1	-1.48686	-0.280563	-0.646412	2.86398e-07	0.279598	0.331205	2.98	2.36	1.74
YLR241W	1.19861	0.327081	0.113916	2.89368e-07	0.0336967	1	0.39	-0.44	-0.22
MYO1	-1.3314	-0.087356	0.0803913	2.89993e-07	0.331815	0.962574	0.66	0.26	0.18
PET8	1.11361	0.405074	0.264309	2.96598e-07	6.66585e-05	3.55009e-09	0.785	0.15	0.32
YNL010W	-2.07458	-0.850351	-0.0465765	3.04754e-07	0.0732235	0.00118835	0.365	0.28	0.17
IMP3	-1.93893	0.485468	-0.0442581	3.0823e-07	0.87624	0.580372		-0.31	-0.46
ESA1	-1.40527	0.45489	0.443076	3.18133e-07	0.481879	0.301413	0.395	0.46	0.39
NRK1	-1.88675	-0.495379	0.56768	3.19943e-07	0.518051	0.306136	-0.09	-0.91	-0.84
GYP5	1.07142	-0.0808844	-0.298218	3.30948e-07	0.564166	1.103e-12	-1.135	-0.29	-0.37
KIN82	1.38335	-0.622835	-0.947169	3.31776e-07	0.420759	0.0502599	-0.08	0	-0.07
GPH1	1.79925	-1.43144	-3.57609	3.55901e-07	0.203741	0.664312	-1.02	-1.2	-0.6
FOL1	-1.3694	-0.215155	-0.019637	3.82758e-07	0.430293	0.272793	-0.385	-0.15	-0.14
YOL037C	-1.9507	-2.05097	-2.02301	3.84945e-07	0.0332731	0.0148225	0.38	0.05	-0.05
GIS1	1.13584	-0.788912	-0.6416	4.05957e-07	0.235292	0.0171502	-0.89	-0.8	-0.48
YLR194C	-1.1635	-0.605236	-0.565326	4.13117e-07	0.528001	0.0840599	-1.205	-0.84	-0.78
CUE5	1.55521	0.430364	0.915387	4.33931e-07	0.211107	0.735604	-0.57	-0.1	-0.06
TEF4	-1.39777	-1.06806	-1.51191	4.60774e-07	0.828581	0.841567	0.155	0.18	0.3
SIP4	-2.37792	-0.908998	-0.000768767	4.72038e-07	0.105416	0.376727		-0.99	-0.82
APC5	-2.23433	0.641966	0.549408	4.7511e-07	0.000202107	0.921132	0.385	0.53	0.42
YNL092W	1.5904	0.146101	-0.0409948	4.87639e-07	0.133574	0.978609		-0.91	-0.7
KIN1	1.32359	-0.240576	-0.314669	4.87639e-07	0.0471645	0.0778089	-1.18	-0.5	-0.42
SPC98	-2.32627	0.650793	0.872651	4.9135e-07	0.294099	0.0793423	0.14	0.36	0.21
REV1	-1.23238	-0.448045	-0.315874	4.92318e-07	0.808516	0.316678	-0.47	-0.29	-0.28
PTM1	-1.13854	-0.240651	-0.570925	4.96067e-07	0.076158	0.0158624	0.44	-0.28	-0.15
YDL144C	1.1433	0.75988	0.195954	4.99924e-07	1.2482e-05	1.81671e-32	0.075	0.39	0.41
GCD6	-1.21792	-0.229726	-0.348583	5.09911e-07	0.497825	0.990534	-0.12	0.35	0.16
GGA1	1.52695	-0.446898	-0.57256	5.17352e-07	2.46884e-09	1.16117e-07		-0.09	0.03
OPI10	1.27999	-0.0155168	0.276361	5.23362e-07	0.00101739	0.0121367	-0.17	0.24	0.3
SMY2	-1.30015	-0.848831	-1.22536	5.2414e-07	0.0214495	0.0431381	-1.06	-0.54	-0.6
HOT13	-2.45387	-1.27661	-0.920642	5.29965e-07	0.27679	0.0131125	-0.17	-0.49	-0.56
FUI1	-1.66743	-0.335876	-1.00964	5.54103e-07	0.000171133	1.37119e-08	-1.42	-0.93	-1.08
YLR149C	1.25731	-1.44752	-1.70426	5.86522e-07	2.73935e-08	4.50293e-08	-1.39	-1.46	-1.04
FLO9	1.54366	2.3194	2.47064	5.8925e-07	0.0125604	1	0.09	-0.44	-0.18
PHO90	-1.37181	-0.0564026	-0.550212	6.15032e-07	0.023969	0.10054	-0.485	-0.71	-0.59
UTP7	-1.1871	0.919285	0.13458	6.17111e-07	0.832332	1	-0.545	-0.54	-0.38
DBP7	-1.30768	1.11978	0.439505	6.17581e-07	0.442614	0.352675	-0.415	-0.2	-0.39
AIM21	1.18856	0.470086	0.435939	6.3666e-07	0.0409374	0.0126515	-0.675	-0.4	-0.33
TOD6	-1.87527	1.09101	0.503479	6.42689e-07	0.155093	0.341744	0.87	-0.31	-0.01
SHU2	-3.14964	-0.760926	0.575908	6.60274e-07	0.394971	0.0389391		0.52	0.39
UBA2	-1.20158	-0.799521	-0.107889	6.8854e-07	0.00130672	0.490317	0.15	0.37	0.3
RBG2	-1.22974	0.0133609	-0.769203	6.99404e-07	0.415151	0.245122	-1.06	-0.27	-0.39
PSK1	1.21243	-0.670595	-0.786507	7.188e-07	0.289775	0.205405	-0.215	-0.43	-0.26
PPZ2	1.16563	-0.0137249	-0.136683	7.2806e-07	1	0.462939	0.185	-0.18	-0.03
MHP1	1.16767	0.0802829	-0.15178	7.29156e-07	0.00366568	7.63863e-05	-0.225	-0.28	-0.05
NUP192	-1.1894	-0.310079	-0.651442	7.31763e-07	0.000189388	0.00695733	0.26	0.1	0.22
YJL185C	1.20332	0.30227	0.0234493	7.3185e-07	0.461706	0.0231622	-0.095	-0.44	-0.41
YOL019W	-1.17617	-0.550924	0.0871405	7.6026e-07	1.12441e-06	1.06314e-05	-2.44	-2.37	-2.36
MRPL25	-1.93048	-0.657912	0.426244	8.00072e-07	0.553598	0.192848		-0.08	0.04
YJL049W	-3.04852	0.557853	0.913172	8.03889e-07	2.6995e-18	2.2112e-21		0.7	0.72
YMR027W	1.08766	0.358173	0.424528	8.09099e-07	0.922352	0.176099	-0.08	0.2	0.12
AYR1	1.07656	-1.45836	-1.52811	8.36441e-07	0.000251624	0.744164	0.325	0.09	0.21
TRS23	1.0791	0.569324	0.648942	8.46814e-07	1.3797e-06	0.210713	-0.49	-0.11	-0.28
ARG4	-1.31649	-0.510424	0.378694	8.74154e-07	0.0829718	0.149923	-0.23	0.44	-0.07
GTO1	-1.5172	-1.37266	-2.60286	8.78977e-07	0.00298939	0.275213		-2.47	-2.47
GCD14	-1.51032	0.909803	0.507692	8.81622e-07	0.109656	0.160105	-0.495	-0.19	-0.12
PPM2	-2.32077	1.08056	0.0112379	8.93319e-07	0.000848725	0.769384
SRO7	1.14419	1.28896	1.20028	8.93319e-07	0.98291	0.00966911	-0.12	0.23	0.24
SES1	-1.19906	-1.07957	-1.38768	9.09183e-07	0.00451594	0.00582662	-0.52	-0.16	-0.15
GLN4	-1.14873	-0.66989	-1.70098	9.45835e-07	0.987093	0.70241	-0.385	0.07	-0.07
APC9	1.16356	0.397372	0.356318	9.55923e-07	0.823501	0.652278	-0.015	0.25	0.32
RPL16A	-1.44658	-0.370792	-0.363798	9.56506e-07	0.281782	0.0208587	0.06	-0.28	-0.15
SCC2	-1.73073	0.251736	0.381801	9.76199e-07	0.324672	0.977323	0.06	-0.04	0.04
RPS22A	-1.34763	-1.02582	-0.7049	1.00961e-06	0.0465218	0.83087	0.14	-0.07	0.06
RPS9B	-1.19104	-0.629076	-1.19395	1.02859e-06	0.0356606	0.234439	-0.065	0.01	0.02
MET8	-2.57662	-1.79001	-2.70781	1.02928e-06	0.014699	0.000654323	-0.31	-0.1	-0.04
SEE1	-1.07948	-0.453491	-0.607334	1.07793e-06	0.15195	0.13115	-0.915	0.16	-0.01
ECM4	1.16455	0.238773	-1.30683	1.07793e-06	1.35211e-09	6.12622e-08	-1.31	-0.38	-0.28
YKL044W	-3.36874	-1.52072	-1.62123	1.10157e-06	0.015191	0.00621188		-0.24	0.07
GPI18	-4.64827	-1.04194	-0.139763	1.11945e-06	0.104371	0.255363	-0.19	-0.86	-0.75
SST2	1.37319	3.10934	2.19656	1.12052e-06	1.74661e-08	5.26554e-18	2.31	2.63	2.22
FMP37	-1.96896	0.739448	1.14334	1.1243e-06	0.000646161	0.222544	-1.6	0.11	0.54
BMS1	-1.28655	0.112115	0.260765	1.13765e-06	0.000680543	0.971548	-0.78	-0.35	-0.58
CMK1	1.19087	-0.440156	-1.03243	1.14518e-06	9.27709e-10	1.27069e-07	-0.585	-0.07	0.06
PRM2	-1.67344	-0.668519	-1.60118	1.18224e-06	1.22913e-05	3.00275e-07	0.025	-0.97	-0.99
YJR011C	-5.09832	-0.469029	0.914467	1.24318e-06	0.00821013	2.72299e-11	0.61	0.5	0.11
YJR008W	1.07497	-0.535561	-1.06932	1.24852e-06	0.127506	0.241901	-0.66	-0.62	-0.46
AMS1	1.08289	0.353205	-1.33776	1.27708e-06	0.333071	0.355463	-2.225	-1.49	-1.17
MAM3	1.08264	0.104843	0.301073	1.29935e-06	0.419365	0.226761	-1.22	-0.53	-0.56
YSA1	1.05613	-0.463394	-0.624675	1.31658e-06	0.000126396	0.00928324	0.08	0.74	0.78
YLR257W	1.2824	0.507808	1.09501	1.33947e-06	0.0181343	0.000306982	-1.6	-1.34	-1.06
MPP10	-1.10327	0.783105	0.504692	1.35482e-06	0.000276742	1.03262e-06	-0.57	0.04	0.01
MSA1	1.12304	0.829497	0.598889	1.39661e-06	0.0576635	0.0249553	-0.34	-0.66	-0.44
ATG5	-1.38585	-0.354445	0.0975645	1.41218e-06	0.493824	1.57576e-05	-0.225	-0.23	-0.45
EFR3	-1.57486	-0.114373	-0.352516	1.47685e-06	0.0237741	0.0121367	0.435	0.26	0.24
ADE16	1.11096	0.0487806	-0.702898	1.47858e-06	0.12375	0.956152	-0.75	-0.09	-0.05
YCR043C	-1.40833	-0.747965	-0.657087	1.48448e-06	7.88687e-48	2.59781e-18	1.01	0.39	0.35
HOT1	1.0173	1.36874	1.4953	1.48551e-06	0.0692199	0.00353566	-0.57	0.24	0.02
DIA3	1.44736	0.694984	0.297087	1.50026e-06	0.766353	0.483564	-1.19	-1.06	-0.74
RPG1	-1.19382	-0.218159	-0.958588	1.5557e-06	0.10637	0.000263178	-0.765	-0.36	-0.36
YOL047C	1.64672	-0.414295	-1.66483	1.56373e-06	0.0178432	1.19208e-06	-0.035	-0.15	-0.24
RXT3	1.11291	0.747753	0.800655	1.56879e-06	0.654168	0.120044	0.25	0.22	0.4
YJR142W	1.09057	0.568247	0.284855	1.56879e-06	0.0766542	2.82486e-05	0.885	0.71	0.75
YFL054C	1.34459	-0.816646	-1.94165	1.60014e-06	0.202688	2.60289e-07	-0.315	-0.4	-0.23
OSH6	1.21542	0.0613818	-0.22387	1.60503e-06	0.726339	0.306669	-0.04	0.25	0.4
PKH1	1.06402	-0.499241	-1.16187	1.62808e-06	0.0579458	0.018312	-1.14	-0.47	-0.29
YAK1	1.08961	-0.210367	-0.32947	1.72941e-06	0.110154	0.000495659	-0.91	-0.73	-0.48
YMR181C	1.05833	0.279714	0.268284	1.73549e-06	0.00155224	0.0910389	-0.385	-1.05	-0.68
ZTA1	1.12674	0.941543	0.219004	1.74996e-06	0.000695992	0.0315797	-1.085	-1	-0.6
STI1	1.18035	0.283781	-0.884142	1.76327e-06	0.169291	0.806817	-2.15	-1.45	-1.32
SDH2	1.36674	-0.598994	-0.702598	1.8183e-06	0.83643	0.392105	-0.055	-0.07	-0.15
CPR4	1.04153	0.136845	0.00587937	1.85392e-06	0.900689	0.0066737	-0.81	-0.65	-0.47
YBR139W	1.13995	-1.02714	-1.36959	1.87296e-06	0.00186306	0.0138034	-0.625	-0.35	-0.24
CMS1	-1.4056	-0.4371	-1.36918	1.94151e-06	5.08388e-11	3.30145e-11	0.58	-0.16	-0.09
MUP3	-1.7205	-4.34239	-4.9726	1.96263e-06	0.0369833	0.517991	-0.425	-0.98	-0.88
SDT1	-1.43667	-0.698454	0.318439	2.01309e-06	0.495028	0.0042982	-0.67	-0.72	-0.56
YPI1	1.60309	0.510335	0.641693	2.02938e-06	0.315978	0.00051887	0.345	0.6	0.45
SGN1	1.124	0.943663	0.689401	2.02938e-06	0.0030822	0.00299947	0.72	0.35	0.31
THG1	-3.76217	0.481496	0.208383	2.0537e-06	0.0274974	0.397094	0.45	0.59	0.47
AZF1	1.13038	0.373306	0.706181	2.0656e-06	0.0372509	1.74526e-05	-0.7	-0.5	-0.42
STE18	-2.16873	0.406168	1.05705	2.06931e-06	0.889778	0.458667		1.02	0.9
PEX1	1.12412	0.978649	1.10447	2.07945e-06	0.0519818	9.89719e-05	-1.06	-0.42	-0.58
GSC2	-1.34373	-1.03566	-0.91887	2.19935e-06	0.500593	0.266821	-1.19	-1.9	-1.79
ADH7	1.89803	0.656186	1.99435	2.2391e-06	0.328485	0.345911		1.29	1.17
PUS5	1.33516	0.802823	0.463012	2.31032e-06	0.000192836	0.545814	0.845	-0.03	0.11
SSO2	1.16722	0.816819	0.71335	2.4492e-06	0.354485	0.00113223	0.455	0.85	0.86
YDL121C	-1.06261	-0.0364005	-0.117638	2.48763e-06	0.0450865	0.0523823	-0.095	0.41	0.01
KRS1	-1.0711	-0.232311	-0.509569	2.53374e-06	0.607837	1	-0.645	-0.15	-0.27
YGL082W	1.11508	0.415174	0.637483	2.54824e-06	9.78843e-05	9.17212e-07	0.365	0.4	0.34
YOR385W	-1.30996	-0.387131	-0.107349	2.5693e-06	0.0952418	3.80722e-07	-0.345	-0.73	-0.67
GRS1	-1.1934	-1.25401	-1.29117	2.69267e-06	0.312888	0.0172563	-0.235	0.01	-0.08
MSN4	1.19304	1.18099	1.0601	2.70588e-06	8.01152e-26	1.17482e-26	-0.86	-0.8	-0.71
ICY1	-1.17676	-1.83825	-0.307866	2.80726e-06	0.0412836	0.42655	0.19	-1.28	-0.81
NSE3	-1.27352	0.0281036	-0.0168413	2.93692e-06	0.219284	0.0827947	0.195	-0.18	-0.11
NUC1	-1.29689	0.133257	-0.384553	3.0391e-06	2.07609e-05	0.00638676	0.175	0.31	0.25
RPS16A	-1.29269	-0.521206	-0.0733167	3.04093e-06	0.526135	0.832689	0.88	-0.14	0
YJL068C	0.993241	-0.380985	-0.527572	3.14829e-06	0.138539	0.00529731	-0.34	0.28	0.31
NIP1	-2.26194	0.0708704	-0.555946	3.23938e-06	0.259652	0.000965103	-0.255	-0.19	-0.08
RPL27B	-1.07402	-0.379138	-0.905586	3.23938e-06	6.32533e-06	4.00782e-06	0.485	0.52	0.51
UTP18	-1.37651	0.766037	0.0198854	3.34818e-06	0.000281872	0.00259354	-0.69	-0.07	-0.21
FMP46	1.0889	0.0921969	-0.0438576	3.35444e-06	0.33967	4.22277e-10	-0.26	0.12	0.11
PUT2	1.20086	0.269112	-0.119227	3.54854e-06	0.0098494	0.264012	-0.605	-0.29	-0.14	NCR
RPO31	-1.16075	-0.0910167	-0.591775	3.70587e-06	0.000855974	0.00862855	-0.34	-0.51	-0.43
CDC10	-2.31958	0.583859	0.628386	3.83551e-06	0.923162	0.717319	0.24	0.33	0.24
PUT1	-1.37175	-0.815725	-1.36039	3.83551e-06	0.422193	0.0981156	-1.635	-3.15	-2.05	NCR
YCL002C	-3.32993	0.0229207	0.687042	3.96879e-06	0.13776	0.0239509	0.655	0.18	0.18
SYP1	1.03415	-0.178297	-0.143534	3.96879e-06	0.152478	0.788545	-0.15	-0.35	-0.12
LIP1	1.02479	0.609055	1.10555	3.97012e-06	7.67456e-07	1.92186e-06	0.34	0.61	0.42
USV1	1.24889	-1.30957	-1.44626	4.01747e-06	9.00033e-08	7.07099e-05	-1.63	-1.86	-0.72
SUI2	-1.87722	0.43625	0.491869	4.01747e-06	1.78463e-14	0.348404	0.035	-0.21	0.13
COQ4	1.23065	0.015118	-0.0294822	4.0752e-06	0.955391	1	-0.57	0.2	0.15
DAK1	1.10647	0.554323	-0.459051	4.16081e-06	0.652036	0.231846	-0.79	-0.64	-0.23
MTD1	-1.0317	-1.9322	-2.28123	4.19753e-06	0.0376321	0.853126	0.51	0.48	0.48
YLR326W	1.0696	0.519694	0.307035	4.2219e-06	0.13895	0.0523491	-0.8	-0.08	-0.42
ARR2	-2.48573	-1.23864	-0.64808	4.35632e-06	0.918853	0.39126	0.29	-0.14	-0.03
RHR2	-1.10763	-0.503551	-0.669162	4.36102e-06	0.171293	0.00107489	-0.89	-1.67	-0.93
YFR018C	1.18678	1.63289	0.97583	4.55425e-06	0.0078588	0.975365	0.495	1.34	1.11
PET117	1.41671	-0.304484	0.489539	4.66177e-06	0.862296	0.951598		0.12	0.25
GLO1	0.996031	0.0117504	-0.733645	4.74816e-06	0.414003	0.766771	-0.265	0.23	0.07
YJR015W	1.12987	0.80264	0.721169	4.9241e-06	0.811827	0.0538747	0.305	0.37	0.39
ASI2	0.955486	0.0898036	0.0911266	4.94395e-06	0.0100244	0.0107351	-0.045	0.17	0.28
SUA5	-1.70117	0.402627	0.30509	5.07189e-06	0.0152087	0.00011717	-0.73	-0.67	-0.92
RTT10	-1.66105	-0.0539369	-0.473901	5.19609e-06	0.961694	0.209924	0.18	0.12	0.02
RSM10	-1.33305	-1.24934	-0.69589	5.21361e-06	0.510206	0.699608	-0.26	-0.49	-0.52
MIS1	-1.08674	-0.286647	-0.658406	5.26936e-06	0.00788437	0.000196512	-0.26	0.43	0.49
MLP2	-1.27198	-0.420538	-0.330272	5.32298e-06	0.00451594	8.35032e-06	-0.05	0.19	0.06
IES1	1.01644	0.935072	0.706095	5.36477e-06	2.54207e-05	6.46166e-05	-0.315	-0.16	-0.08
ARA1	1.001	-0.768942	-1.40064	5.48373e-06	0.287438	0.247982	-0.48	-0.03	0.09
IKI1	-1.46865	0.0952914	0.100264	5.49509e-06	1	0.944854	-0.47	0.19	-0.07
YMR134W	-1.6483	-0.196834	0.631152	5.58716e-06	0.0397951	0.0977912	-0.38	-0.19	-0.1
SAF1	1.33749	-0.291342	-0.29523	5.59331e-06	1.69405e-16	4.93018e-19	-0.86	-0.68	-0.4
YGR250C	1.00359	0.730357	0.447966	5.76058e-06	0.0506892	0.364641	0.175	-0.11	-0.16
RCL1	-1.16434	0.705975	-0.037838	5.88564e-06	0.00742534	0.191014		-0.56	-0.64
POP1	-1.0521	0.0651332	0.00294013	5.88564e-06	0.0952418	0.0239199	-0.515	-0.57	-0.53
PPH3	-1.09337	0.541878	0.485346	5.94967e-06	5.06763e-12	0.000953776	-0.275	-0.14	-0.1
MSC3	1.05088	0.176233	0.190317	6.00049e-06	0.530433	0.28288	-1.015	-0.69	-0.59
HFM1	1.39897	1.77608	1.42879	6.33047e-06	1	0.00399086		2.09	1.92
PEX25	-1.2315	-0.00280102	0.285239	6.34798e-06	0.000313638	0.00617887	0.095	0.43	0.4
YLR243W	-1.22015	0.266136	0.00446408	6.38233e-06	0.76211	0.807078	-0.125	0.17	0.24
GPI16	1.03088	0.306412	-0.0755533	6.41361e-06	0.156547	0.391766	0.375	0.08	0.07
DNL4	1.10319	0.81543	0.74354	6.49501e-06	0.955487	0.365289	-0.46	-0.22	-0.27
FIN1	1.14214	0.68166	0.794326	6.51107e-06	9.2479e-06	0.0214368		0.27	0.13
IMP1	1.18596	0.430144	0.118784	6.57382e-06	0.312702	0.0515203	0.34	0.63	0.57
MRPL28	1.09659	0.614704	0.717154	6.73562e-06	0.183741	0.344556		0.07	0.16
PUS9	-1.31239	0.0755739	-0.128167	6.7805e-06	3.7308e-05	0.00654761	-0.23	0.16	-0.01
ALD5	-1.05264	-0.620777	0.136426	6.87502e-06	0.00175618	2.84668e-08	-0.65	-0.59	-0.45
TSR2	-1.30547	0.852182	0.212367	6.87968e-06	0.782932	0.764226	0.29	0.4	0.23
RRI2	1.19463	-0.00245759	-0.00230622	6.94508e-06	0.559305	0.0210035		-0.21	-0.39
CYB2	0.978295	-0.563303	-0.414315	6.9589e-06	0.50674	0.559884	-0.365	-0.45	-0.2
DDR48	-1.66157	1.40041	0.298454	7.02638e-06	0.00105061	0.0861822	-0.6	-0.67	-0.1
VPS62	0.992076	0.0866383	0.0751447	7.22568e-06	0.00644524	0.970261		-0.52	-0.48
MLH2	1.0424	0.814038	1.10466	7.24231e-06	0.845707	1		0.19	0.07
PDR15	1.04368	-0.198023	-0.618315	7.27307e-06	0.0117084	0.832689	-0.255	-1.29	-0.32
ALB1	-1.30657	0.911712	0.456784	7.30225e-06	0.0133056	0.0479262	-0.795	-0.17	-0.21
CDH1	0.993009	0.778849	0.879768	7.33574e-06	0.541374	0.55701	-0.015	-0.12	-0.1
GRS2	1.1625	0.536516	0.336963	7.39049e-06	2.92524e-12	1.04637e-06	-0.595	-0.16	-0.14
TRS120	-1.04131	0.0884711	0.364918	7.60331e-06	0.9975	0.312482	-0.045	0.31	0.17
HXT5	1.25434	0.0848504	-1.18636	7.86171e-06	0.308683	1	-4.42	-4.43	-3.24
HSP60	1.07325	-0.201878	-0.740418	7.8745e-06	0.221086	0.845369	-0.275	-0.49	-0.27
OCA2	-1.13223	-0.277947	-0.19773	7.94331e-06	0.000776144	0.00577797	0.05	0.04	0.1
YOL162W	-6.49083	-4.64083	-1.12265	7.94331e-06	0.0157854	0.00552942	-0.58	-1.01	-0.9
HNT3	-4.30203	1.16932	1.65959	8.04201e-06	0.147743	0.774416		0.43	0.3
UBP10	-1.24696	-0.359939	-0.799072	8.04303e-06	0.0203474	0.00821023	-1.195	-0.59	-0.49
ADE3	-1.02118	-1.58196	-1.99386	8.04303e-06	0.819553	0.747714	0.41	0.09	-0.05
NEW1	-1.09653	0.3081	-0.772718	8.04303e-06	0.249397	0.747812	0.215	-0.25	-0.09
GID7	1.03641	-0.127865	-0.359518	8.08938e-06	0.0155092	0.704073	-0.81	-0.55	-0.33
RTT107	-1.23772	-0.668402	-0.377595	8.15053e-06	0.000100401	0.520303	0.45	0.52	0.24
SYF1	-1.09473	-0.0779588	-0.287442	8.22303e-06	0.973209	1	0.17	-0.08	-0.16
NRG2	-1.16462	-1.43205	-0.981766	8.42898e-06	0.0263168	0.157308	-0.105	0.19	0.11
YDR029W	-1.6105	-0.00230696	-0.570179	8.44783e-06	2.048e-08	0.409647	0.5	-0.03	-0.09
RCE1	-2.13216	0.62974	0.804294	8.47941e-06	0.793601	0.850467	1.095	0.4	0.52
EAF3	0.962587	0.916821	0.677767	8.53229e-06	0.000680543	6.36024e-06	-0.84	-0.28	-0.17
RAD4	0.967537	0.692987	1.09592	8.74431e-06	0.511121	0.0281871	-0.65	-0.35	-0.2
YCR061W	1.00295	-0.0709168	-0.604554	9.3272e-06	0.000744286	0.159363	-0.395	-1.22	-0.34
URA8	0.964396	-0.157185	-0.0641751	9.35412e-06	0.000282903	0.00019526	-0.21	-0.81	-0.36
YDL124W	0.980066	-0.357099	-1.4001	9.66112e-06	0.0894609	0.340369	-0.645	-0.38	-0.11
GSY1	1.21238	-1.94331	-2.20907	9.75715e-06	0.768638	0.158059	0.92	-0.11	0.39
SHM2	-1.44268	-2.7931	-3.66748	9.95589e-06	0.867863	0.000557197	0.145	-0.16	0.02
CNS1	-0.987809	0.599283	0.0166024	1.03208e-05	0.503332	0.00659685	0.27	0.06	-0.02
APA2	0.970758	0.759573	0.277708	1.04935e-05	0.296121	0.526769	0.28	0.45	0.49
BUD21	-1.15608	1.2715	0.767644	1.12342e-05	1.10065e-06	0.142749	-0.01	0	-0.03
SPB4	-0.989095	0.436872	0.31028	1.12365e-05	0.00243949	2.06091e-05	0.24	-0.14	-0.12
SLA1	1.00717	-0.530541	-0.701553	1.12365e-05	0.29995	0.0191672	-0.58	-0.57	-0.57
YER158C	0.929992	0.940674	0.960368	1.12976e-05	6.82948e-11	2.34598e-12	-0.415	-1.13	-0.87
ILS1	-1.16117	-0.676068	-1.18537	1.13784e-05	0.321031	0.0378648	-0.095	-0.08	-0.23
XYL2	1.74384	0.185838	-0.444083	1.20645e-05	0.69834	0.232806	-1.31	-1.01	-0.67
AAC1	0.961172	0.608143	0.444461	1.21136e-05	0.0151333	0.20824	-0.59	-0.06	-0.21
ECM3	-1.07782	-1.67591	-1.54597	1.22822e-05	0.770407	0.325555	0.355	-0.97	-0.5
SUL2	-1.99731	-3.57807	-4.83764	1.26288e-05	2.97035e-07	0.00114099	0.18	-0.58	-0.35
YOL073C	1.1149	0.0195859	-0.303084	1.26486e-05	1	0.221079		0.11	0.25
SPC2	-2.58584	-0.213496	0.313117	1.29845e-05	0.00133638	0.0280863	0.61	0.59	0.51
ZRG8	0.938757	0.59666	0.562667	1.31038e-05	0.0303514	0.0140466		-0.2	-0.07
PNC1	1.27524	-2.20296	-3.91725	1.3547e-05	3.45928e-05	0.00786947	-0.795	-0.45	-0.26
SKP1	0.955739	0.447377	0.0929	1.46155e-05	0.00380954	5.1319e-06	-0.605	0.3	0.26
VHR1	-1.04199	-0.621138	0.370392	1.46591e-05	0.810107	0.0253274	-0.44	-0.76	-0.26
BFR1	-1.0813	-0.841534	-1.14348	1.46752e-05	0.573124	0.885433	-0.315	-0.01	0.15
PRD1	1.00919	0.101242	-0.164897	1.47075e-05	0.205471	3.35459e-08	-0.055	0.18	-0.03
ECM14	1.11006	0.431229	0.382037	1.47437e-05	3.54717e-07	2.23784e-07	-0.275	-0.1	-0.06
SUI3	-1.53293	-1.60114	-1.42808	1.47985e-05	1.26978e-25	9.53001e-39	0.565	0.37	0.47
YBR271W	-1.53375	0.536361	0.083998	1.48581e-05	0.00592314	0.965864		-0.22	-0.46
YNL134C	1.00299	-0.204548	-0.266773	1.50138e-05	0.0102606	1	-0.28	0.09	0.27
ATP15	-2.11337	-0.54895	0.468556	1.52315e-05	0.00277493	0.373589	2.235	1.04	0.78
APT2	-1.25213	0.0363728	-0.0438902	1.54568e-05	4.13578e-07	0.00654013	-0.475	-1.15	-0.97
YER134C	1.23734	0.525128	0.474461	1.56634e-05	0.0641491	0.263358	0.32	0.62	0.64
NGR1	1.00262	0.00911652	0.259342	1.59553e-05	0.0392199	0.0110325	-0.55	-1.13	-0.73
PYK2	1.16004	-1.05618	-1.36958	1.60203e-05	1.5485e-05	5.62713e-05	0.505	0.3	0.36
GIR2	-0.980842	0.166873	-0.195581	1.63659e-05	0.00759826	1.59136e-05	0.105	-0.2	-0.11
SPT15	-1.31268	-0.988214	-0.846771	1.64797e-05	0.796084	0.484739	0.685	0.3	0.36
NPY1	-0.98489	0.335121	0.546308	1.69592e-05	0.00993474	0.0796387	0.93	0.58	0.62
IES4	1.09782	0.792609	1.33611	1.71094e-05	2.27864e-10	6.13643e-07	0.405	0.36	0.41
RTR2	-1.99892	-0.00583158	0.0683346	1.72389e-05	1.27636e-16	1.2776e-28		0.81	0.63
MDM38	-0.980605	-0.771628	-0.872375	1.73358e-05	0.973859	0.375996	-0.745	-0.35	-0.64
MBR1	1.17093	-0.689274	-1.2471	1.73938e-05	0.743759	0.530694	-0.645	-0.63	-0.27
MRH1	1.23387	1.12797	0.952714	1.77352e-05	0.00874638	0.0248629	1.69	0.87	0.88
CAN1	1.185	1.42716	1.07253	1.78894e-05	4.58354e-13	8.12435e-27	-0.455	-0.18	-0.4	NCR
TPK1	1.23889	-2.06594	-2.56481	1.79696e-05	0.0671931	0.798561	-1.24	-0.48	-0.22
GUA1	-1.14982	-0.149877	-0.658213	1.8385e-05	0.0133234	0.197243	0.3	-0.11	-0.11
SUR1	-0.98768	-1.2729	-1.04525	1.8452e-05	0.000492647	6.57838e-06	-0.68	-1.17	-0.9
SSB1	-1.2974	-0.544315	-1.6139	1.8548e-05	0.79018	0.617341	0.05	0.05	0.18
AGP1	-1.06291	-0.396211	-0.822416	1.86661e-05	0.144471	0.233985	-0.6	-2.15	-2.07	NCR
LEU3	-0.948915	-0.705005	-0.560397	1.87132e-05	9.16348e-08	6.46186e-06	-0.29	-0.28	-0.34
HST2	0.883714	-0.112034	-0.218913	1.97417e-05	0.0607503	0.842718	0.375	-0.02	0.15
LSC2	0.982382	0.286988	0.139836	2.00001e-05	0.496422	0.392622	-0.865	-0.48	-0.33
TFC7	0.980661	0.392452	0.602082	2.00197e-05	0.0306049	0.0838966	-0.24	0.1	0.03
ERG28	-2.61631	-0.830864	-0.400597	2.02448e-05	0.922212	0.951598	1.18	0.09	0.2
RGT1	0.90255	-0.150864	-0.104183	2.09727e-05	0.121327	0.190163	0.4	-0.16	0
PRS4	-1.43562	-0.0206523	0.0451151	2.13101e-05	0.995384	0.39693	0.255	0.29	0.15
RPC53	-1.37928	-0.713436	-1.20972	2.15657e-05	0.00114696	0.00028152		-0.28	-0.31
PET112	1.17744	0.574943	0.730141	2.16167e-05	0.540975	0.564478		0.62	0.57
OAC1	-1.12676	-0.991343	-0.570246	2.18636e-05	0.000254856	0.00373153	0.43	0.26	0.36
DBP6	-1.19932	0.326565	-0.0550657	2.21538e-05	0.177515	0.0249166	0.07	-0.11	-0.16
BBC1	0.988837	0.30757	0.258064	2.21847e-05	0.00134573	6.37127e-08		-0.48	-0.39
ATP17	1.00062	-0.288972	0.529731	2.23634e-05	0.99033	0.946239	1.55	0.76	0.4
MAK16	-1.13117	1.70325	0.993335	2.2481e-05	0.00222754	0.00182611	-0.94	-0.27	-0.33
SOV1	-1.59789	0.386279	0.59501	2.28111e-05	0.0439778	0.00145165	-0.34	0.03	0.03
ATP20	-4.31859	0.529926	1.30472	2.30506e-05	5.16185e-05	0.00618157		1.35	0.99
SBA1	1.03454	0.168171	0.763366	2.30673e-05	5.87822e-07	0.000497014	-0.685	0.25	0.13
SRP21	-1.08112	-0.481522	-0.388939	2.30673e-05	4.70888e-10	7.90598e-12	1.52	0.53	0.58
SEC11	1.07558	0.183431	0.566891	2.35248e-05	0.633527	0.0237935	1.01	0.76	0.65
DUS1	-1.21105	0.988239	0.309573	2.40472e-05	1.76579e-07	4.82579e-05	-0.75	-0.06	-0.27
TVP18	-1.33576	-0.441048	-0.384931	2.40671e-05	0.0505321	6.12622e-08	0.74	0.4	0.59
SRP14	-1.00142	-0.213603	0.514981	2.42749e-05	0.126945	0.00642947		0.55	0.69
YPT10	0.987054	0.523896	0.93596	2.49195e-05	0.00528815	0.0381153	0.48	0.62	0.49
RPL36A	-3.15857	0.103191	-1.39279	2.51493e-05	0.982174	0.745857	0.27	0.61	0.35
RTC3	1.1444	-1.97608	-2.96216	2.57695e-05	0.676121	0.445576		-1.13	-0.14
TFB4	-1.25228	0.0833832	0.189808	2.64743e-05	0.294241	0.672827	0.135	0.3	0.2
YCR076C	1.01056	0.953554	0.279333	2.71145e-05	0.120978	0.0158908	-0.885	0.08	-0.12
YME2	0.987211	0.138341	0.203105	2.71145e-05	0.180025	0.605866	-0.335	-0.11	-0.15
CCM1	-1.25409	-0.105067	0.0233349	2.72034e-05	0.582578	0.773965		0.21	0.19
YDL183C	-1.32369	-0.227271	0.0923574	2.76366e-05	0.953787	0.893165	-0.59	-0.57	-0.46
FRE6	-0.979603	0.279803	0.211572	2.77158e-05	0.0637739	0.00185814	0.805	-0.06	-0.23
YGR168C	-1.45443	0.0500686	0.152411	2.79536e-05	3.1857e-11	0.0183664	0.9	0.56	0.59
YJL132W	0.988058	-0.657034	-0.302321	2.81172e-05	0.0767678	0.0315859	0.12	-0.67	-0.14
PRT1	-1.10436	-0.483158	-1.04233	2.81798e-05	5.35951e-06	0.0249581	-0.36	-0.07	0.01
CDC60	-0.988308	-0.68171	-1.30269	2.86034e-05	0.307641	0.946239	-0.4	0.09	0.01
YBL036C	-1.11272	0.244604	0.0457205	2.99231e-05	0.243838	0.420221	0.17	0.42	0.31
SRP68	-1.09444	0.368864	-0.166119	3.04501e-05	0.288267	0.121935	-0.21	-0.14	-0.06
POM33	0.947228	-0.00316433	-0.47931	3.08463e-05	4.12913e-10	0.000926427	0.16	-1.41	-0.71
UBX7	0.942645	0.262293	-0.14273	3.08463e-05	0.201373	0.0428436	-0.255	-0.23	-0.18
YOR228C	1.10488	0.190956	0.264255	3.08463e-05	0.589748	0.155115	0.605	0.11	0.31
QRI1	0.973275	0.272389	0.227247	3.1563e-05	0.731803	0.0219431	0.61	0.67	0.55
SEC10	-1.71759	-0.0396628	-0.105323	3.18418e-05	0.0644899	0.181216	0.08	0.13	0.07
DAP1	1.10197	0.565359	0.461323	3.21205e-05	0.504225	0.0266328		0.24	0.59
AIM44	-1.07295	-0.42575	-0.315546	3.21605e-05	2.46737e-05	0.358255	0.11	-0.05	-0.06
APD1	0.991956	-0.454755	-0.617404	3.23449e-05	0.138156	0.285691	0.75	0.59	1.13
RAD2	0.97281	0.686475	0.260432	3.2414e-05	0.427336	0.0824402		-0.8	-0.61
KTR7	-1.01245	0.26768	-0.317272	3.2414e-05	0.0548005	0.000208015	-0.07	0.08	0.14
SSP2	-2.33302	-1.27101	-1.83552	3.26202e-05	0.823806	0.0418456		-0.13	0.06
KEL3	-0.911576	-0.459051	-0.437661	3.28855e-05	7.06312e-08	1.90666e-12	0.42	0.57	0.49
MIG2	0.979117	1.03494	0.535149	3.39567e-05	0.752448	0.566308	0.7	-0.29	-0.52
RPB8	-0.980942	-0.61192	-0.566585	3.43744e-05	5.47857e-05	0.371612	0.88	1.3	1.21
YNR014W	1.323	-1.89181	-1.88376	3.47043e-05	0.689402	0.557268	-0.555	-1.15	-0.57
YLR363W-A	-1.59038	1.0843	1.26839	3.47259e-05	0.77591	0.946164		0.51	0.2
MEU1	-0.917008	0.0224665	-0.604309	3.4973e-05	0.636413	0.806372	0.035	0.64	0.46
RAS1	-1.2219	0.458148	-0.0367372	3.61216e-05	0.27631	0.448841	-0.74	0	0.21
MNE1	-1.35127	0.967435	0.565867	3.6223e-05	0.832833	0.740513	0.01	-0.2	-0.19
YOR338W	-2.36047	1.29967	0.36756	3.6223e-05	0.0305037	0.395653		-2.09	-1.85
NPL4	0.853372	0.681477	0.239912	3.72154e-05	0.0684917	9.48897e-05	-0.84	-0.03	-0.21
ENT2	1.10791	0.107201	0.385297	3.8719e-05	0.00754887	1.87742e-05	-0.585	-0.46	-0.26
MSA2	1.02756	0.717524	1.11984	3.8719e-05	0.312888	0.899594	-0.105	0.44	0.53
YJR124C	-1.33617	-0.0377933	-0.581194	3.92679e-05	0.137423	0.645623	0.04	0.01	0.03
YDR506C	1.05653	0.596059	0.507207	4.03449e-05	1	0.105984	-0.16	0.04	-0.24
DOS2	-0.927828	-0.572035	-0.0175051	4.03449e-05	0.346268	0.671987	0.365	0.22	0.1
CAF40	1.00293	0.604795	1.0629	4.23334e-05	0.661763	0.496096	0.8	0.14	0.35
CAF120	-1.14292	-1.07507	-0.380224	4.31752e-05	0.390052	0.51981	-0.79	-0.81	-0.88
RPS24B	-1.22332	-0.251857	0.0927165	4.33135e-05	1	0.866476	0.09	0.07	0.2
PUS7	-0.96257	1.1915	0.845794	4.35462e-05	0.027964	0.101355	-0.56	0.38	0.13
MDH3	0.959786	0.413756	-0.115793	4.36906e-05	0.142687	0.343628	-0.03	0.25	0.22
TMA46	-1.11121	-0.0818062	-0.795755	4.42681e-05	0.0863715	0.0249077	-1.2	-0.27	-0.51
RPS26B	-1.16188	-0.21903	-0.77118	4.54324e-05	0.00339594	0.397094	-0.025	0.1	-0.05
IPI1	-1.95483	0.598622	0.145515	4.54579e-05	0.269687	0.27474	-0.185	0.32	0.17
SER1	-1.29221	-1.76401	-2.01081	4.60873e-05	0.00791382	0.000915688	-0.29	0.23	0.07
YLR211C	-1.35613	0.325104	0.110779	4.60873e-05	0.0675099	0.144224	0.395	-0.22	-0.05
PST2	1.01774	0.250092	-0.117249	4.60873e-05	3.45304e-05	0.0573184	0.69	0.75	0.83
PRP21	1.08156	1.27819	1.55695	4.61459e-05	0.0211198	0.0483	0.57	0.49	0.45
LEE1	-1.05454	-0.517707	-0.552803	4.727e-05	6.96658e-10	4.08858e-09	-1.88	-2.16	-1.64
TMN2	0.935434	0.440027	0.237394	4.84644e-05	5.41966e-05	2.01471e-05	0.095	-0.25	-0.26
YLR108C	1.01988	0.0107791	-0.424129	4.88142e-05	0.950431	0.0410314	-0.015	-0.16	-0.22
DEP1	0.922525	1.20931	1.59889	4.88366e-05	0.135881	0.971548	-0.105	0.28	0.29
IML1	-1.07369	-0.47255	-0.524512	4.96152e-05	4.18727e-06	0.0272253	-0.945	-0.52	-0.73
ECM1	-1.24317	0.588032	0.685326	5.00861e-05	0.000183279	0.441627	0.155	0	0.16
IZH3	-1.06653	-0.0243542	-0.270241	5.1047e-05	0.00105229	0.391577	-0.13	-0.26	-0.47
YDR161W	-1.04411	0.289373	-0.26274	5.11989e-05	0.775813	0.239429	-0.405	-0.22	-0.25
PEX14	1.08044	0.910019	1.20724	5.12273e-05	0.00410777	5.07445e-06	0.24	0.2	0.28
LPD1	1.04644	-0.418266	-1.11887	5.16187e-05	0.957935	0.119948	-0.905	0.1	0.07
REI1	-1.13745	1.49281	0.797261	5.16611e-05	0.0426078	0.120019	-0.805	-0.39	-0.35
ATG27	1.04727	0.850444	0.913782	5.22345e-05	0.0197925	0.985463	-0.335	-0.17	-0.06
YIP3	-1.86582	-0.503761	0.0755879	5.30555e-05	0.00753038	6.54576e-06	0.995	0.38	0.42
EMG1	-0.99634	0.356489	-0.286525	5.33906e-05	0.00020026	0.310691	-0.48	0.17	0.04
SQT1	-0.995184	0.228182	-0.309657	5.42238e-05	0.444344	0.814435	0.435	0.65	0.51
HMT1	-1.12017	0.834976	0.353707	5.42279e-05	4.39635e-07	0.00266095	-0.665	-0.59	-0.32
AUR1	-1.16053	0.000153853	0.0252407	5.44024e-05	0.107834	0.753849	0.74	-0.25	-0.26
ZDS1	0.920585	0.473435	0.618574	5.47123e-05	0.861152	0.0136731	-0.31	-0.09	-0.14
AVO2	1.16487	0.190818	-0.125244	5.49654e-05	0.478538	0.0070934	-1.09	-0.32	-0.28
YLR287C	-2.22412	-0.0908934	-0.957588	5.50328e-05	0.0961024	0.772026	-0.79	-0.02	-0.2
YNR066C	-1.6378	0.775147	0.260934	5.52968e-05	2.31237e-10	3.9479e-11
TWF1	0.946783	0.294247	0.0365368	5.52968e-05	0.396581	0.848451	-0.065	0	0.07
BNA6	0.981755	-0.322628	-0.300952	5.55966e-05	0.42845	0.754586	1.24	0.61	0.69
YPR003C	1.02559	-0.238098	0.269255	5.56842e-05	1.28195e-06	3.6646e-10	-0.305	-0.23	-0.13
YJL211C	1.63326	1.9088	0.473977	5.72132e-05	0.0372686	0.108775	0.52	1.67	1.54
APQ12	-1.61794	0.575336	0.901167	5.72132e-05	0.0835908	0.479842		0.76	1.07
YLR290C	1.08993	0.330771	0.367156	5.78932e-05	0.996705	0.221958	-0.325	0.03	0.19
CPS1	-1.09084	-1.29395	-1.94438	5.79431e-05	3.07793e-08	1.78592e-12	-1.465	-1	-2.01	NCR
PHM8	1.24694	0.326636	-0.168089	5.82999e-05	0.0927583	0.067553		-0.53	-0.65
ESF2	-1.01642	0.645712	0.449295	5.87505e-05	0.0215983	0.0156356	-0.06	-0.05	-0.06
GCD2	-1.10561	-0.719722	-0.975411	5.88407e-05	0.974048	0.432331	-0.35	-0.28	-0.18
SAM50	0.9459	0.361001	0.253144	5.90982e-05	0.297019	0.466328	0.43	0.45	0.47
UPF3	-1.01692	-0.410082	-0.347903	5.96968e-05	0.00102073	1.29967e-05	0.11	0.12	-0.06
CPR2	0.850101	0.114998	0.485089	5.98839e-05	0.109323	1.81096e-05	-0.49	0.06	0.09
PKH3	0.864839	0.570743	0.505285	6.00439e-05	8.92998e-08	0.0192053	-0.785	-0.48	-0.34
COX16	-1.3766	0.022043	0.0587488	6.12972e-05	0.000616953	0.000591205	0.45	0.26	0.3
ASP1	-0.913526	-0.404875	-0.790408	6.12972e-05	0.314134	0.867718	0.55	0.59	0.34
CAD1	0.919532	0.445883	0.633134	6.19283e-05	0.198891	0.422372	-0.225	-0.04	-0.25
GRX1	1.04036	-1.13428	-1.11216	6.21263e-05	0.415885	0.369276	0.83	-0.45	-0.28
PAB1	-1.20007	-1.23171	-1.54298	6.26946e-05	0.00284574	0.295309	-0.07	-0.04	0.07
OPY2	0.931109	0.042758	0.191509	6.31473e-05	1	0.949658	-0.91	-0.19	-0.32
SKI3	-0.905667	0.133635	-0.0404916	6.31473e-05	0.0392475	0.0244481	0.02	0.18	0.16
CHS1	-1.17229	-0.0860093	-0.44311	6.87583e-05	0.567388	0.845813	-0.14	-0.55	-0.68
GAS3	-0.872436	-0.645549	-0.187009	6.98064e-05	0.809081	0.00224916	0.42	-0.26	-0.09
YPR011C	0.975774	0.400441	0.301703	6.98064e-05	0.00935023	0.578049	0.295	0.51	0.64
AGX1	0.896656	0.170863	-0.563999	6.98064e-05	0.291711	0.954235	-1.315	-0.87	-0.73
RPS7B	-0.960042	0.0123457	-0.93606	7.07272e-05	0.204005	0.289783	0.09	-0.25	-0.16
END3	-0.903022	0.115599	0.15168	7.09631e-05	0.434001	0.458667	0.285	0.34	0.3
SSF2	-0.902347	0.413162	0.469658	7.12809e-05	2.58598e-07	0.436507	-0.48	-0.08	-0.35
YER130C	-1.22551	-0.216689	-0.232123	7.24478e-05	0.109624	0.0059801	-0.25	-0.23	-0.11
AST2	1.0751	0.748956	0.520763	7.31657e-05	0.320118	0.32165	-0.44	0.14	0.17
ALF1	1.18017	1.66344	1.1361	7.31876e-05	2.54596e-06	1.16567e-10	-0.85	0.62	0.17
SMC5	-1.00273	0.286892	0.786805	7.31876e-05	0.436879	0.725165	-0.54	-0.29	-0.43
YKL033W-A	0.909821	0.0973846	0.829695	7.35285e-05	0.00663626	0.124479	1.11	0.45	0.54
YHR033W	-0.997314	-1.24129	-0.750797	7.3625e-05	0.0115914	0.000875853	0.12	-0.73	-0.31
YOR376W	2.68232	2.97396	3.4116	7.39555e-05	0.202646	0.467702	0.31	0.21	0.36
DOG2	-1.2105	-2.59399	-3.20191	7.42602e-05	0.09041	0.21546		1.12	0.98
YGL204C	-6.92115	0.419479	-0.179497	7.44985e-05	0.688176	0.051094		1.35	1.11
SEC21	-1.00121	-0.244906	-0.384703	7.50682e-05	0.954083	0.828059	-0.625	-0.09	-0.15
YDL062W	-3.29573	0.596964	-1.01139	7.52916e-05	0.012723	0.0479547		-0.54
PEX3	0.890823	-0.00321598	0.0880878	7.56245e-05	0.922352	0.886462	-0.825	-0.3	-0.35
MSH3	-1.05006	-0.321733	-0.706789	7.56898e-05	0.112181	0.00279834	-0.405	-0.16	-0.21
MST1	1.14498	-0.318211	-0.232508	7.58409e-05	0.0731212	0.0135882	-0.1	0.04	0.16
QCR2	0.941072	-0.749788	-1.23847	7.63982e-05	8.05806e-06	5.10829e-05	0.275	0.94	0.75
YLL032C	-1.23772	-0.102556	0.263808	7.88708e-05	2.09717e-05	1.03262e-06	-0.08	0.42	0.34
ERG27	1.15167	0.668267	0.655438	7.92388e-05	0.89313	0.514468	0.145	0.39	0.27
TPS3	0.88254	-1.08256	-1.22344	8.07429e-05	0.634853	0.942092	0.665	0.28	0.38
YKE2	-0.985759	0.564648	0.725484	8.24516e-05	0.811652	0.149923		0.87	0.66
TCA17	-2.11659	0.607822	0.49404	8.44249e-05	0.0085832	0.575366		0.22	0.21
HER1	0.848307	-0.773153	-0.74085	8.5424e-05	0.01615	0.00854871	-0.64	-0.38	-0.35
HXK1	1.48471	-2.72885	-5.32762	8.77783e-05	0.177515	0.387163	-0.655	0.03	0.25
IVY1	0.933857	0.158981	0.317566	8.77783e-05	0.725495	0.0654984	-0.285	-0.11	-0.05
YET1	-1.00147	-0.683777	-0.928586	8.88337e-05	0.975979	0.0053681	-0.915	-0.24	-0.09
NUP170	-0.89802	0.25499	-0.341471	8.88337e-05	0.686751	0.639524	-0.225	-0.2	-0.17
BZZ1	0.91837	0.210639	-0.260066	9.22594e-05	0.0863715	0.0557656	-0.26	-0.1	-0.04
UTP6	-2.94431	-0.105653	-0.947552	9.30685e-05	0.256185	0.0185147	-0.95	-0.47	-0.35
BNA5	0.924975	-0.00793841	-0.196637	9.34916e-05	0.0257691	0.189787	-0.115	0.08	0.01
AVL9	0.869072	0.865152	1.545	9.4002e-05	0.538634	0.571064	-0.29	0.15	-0.05
RAD30	0.880973	0.905119	0.387702	9.42725e-05	4.54435e-06	5.77763e-05	-0.875	-0.5	-0.47
GSM1	1.05396	0.217374	-0.17335	9.47219e-05	0.00287378	0.091866	-0.72	-0.32	-0.63
DSF2	-0.917346	0.0252835	0.222189	9.52293e-05	5.40126e-11	0.000191355	-0.7	-0.28	-0.45
YPR078C	-4.35924	-1.34441	-2.88456	9.53105e-05	0.28356	0.000953776		-0.43
YKR075C	1.26654	0.606134	-0.372751	9.61035e-05	0.731815	0.000622052	-0.67	-0.49	-0.49
OXP1	0.922705	-0.107611	-0.0637592	9.74358e-05	2.46501e-06	0.0104653	-1.01	-0.22	-0.16
FRQ1	0.880773	0.278244	0.675919	9.75842e-05	2.3706e-06	2.19813e-09	0.265	0.73	0.52
CHL4	-1.44193	-0.490853	-0.382429	9.98519e-05	5.67463e-15	1.00917e-17	-0.325	-0.17	-0.06
STP22	0.890334	0.5207	0.620011	0.000100541	0.51422	0.997229		0.05	0.19
UTP15	-1.08948	0.218071	-0.678904	0.000100636	0.412573	0.202984	-0.43	-0.18	-0.05
TIF35	-0.988263	-0.0577197	-0.211319	0.000101243	0.288856	0.247998	0.29	0.32	0.18
AIM4	1.41058	0.270541	0.681271	0.000102057	1	0.843506	0.68	0.41	0.22
SPO23	-3.17405	-0.355381	-0.03101	0.000102339	0.259352	0.0132096		-0.18	0.05
OTU2	-0.9432	0.305255	0.606536	0.000103433	0.319582	0.580372	0.14	-0.01	-0.09
YPR172W	0.912008	-0.154988	-0.352838	0.000107936	0.00325913	2.3204e-06	-1	-0.43	-0.42
YIL096C	-1.87795	0.878463	0.439289	0.000108638	0.747871	0.390785		0.4	0.28
LYS20	-1.27437	-0.245252	0.332697	0.00011026	0.00725344	0.0116888	-0.395	-0.3	-0.12
SDH3	0.96233	-0.283925	-0.183653	0.000110498	1.65595e-06	6.39344e-07	1.105	0.44	0.39
ECL1	-1.08832	0.415102	-0.052859	0.000110899	0.038532	0.00706651			-0.97
PEX5	0.947194	0.767287	1.02007	0.00011377	0.0455343	4.10739e-10	-0.38	-0.18	-0.08
NPR1	-0.991113	-1.25007	-0.696099	0.000114071	0.0863715	0.222955	-0.985	-0.89	-0.98
DCN1	1.36231	1.09742	0.296235	0.000116195	0.000355067	0.00482055	-0.09	0.25	0.07
GAS2	-1.405	-0.654646	-1.05242	0.000118091	8.91934e-17	6.1089e-30		-1.58	-0.99
YFR016C	0.91451	-0.502816	-0.150146	0.000118306	0.613026	0.29993	-0.71	-0.11	-0.19
DCG1	1.21897	2.24456	2.16761	0.000119005	0.00656567	0.000528567	1.52	2.56	1.18	NCR
HSP78	0.997589	-0.796716	-1.98435	0.000119005	0.344579	0.28304	-1.665	-1.18	-1.29
RSA1	-0.979734	0.353961	-0.638588	0.000119382	0.501213	0.48103	-0.39	-0.44	-0.37
PET130	-1.51589	0.187374	-0.0994219	0.000119556	0.956218	0.272072	0.04	-0.37	-0.25
VPS52	-1.5865	0.602523	0.346456	0.000121451	0.918842	0.595572		2.29	2.3
SEC63	-0.94085	-0.425071	-0.503845	0.000122392	4.43685e-05	3.38434e-12	-0.625	0.03	-0.1
ETT1	-1.00162	-0.266384	-0.929979	0.000123231	5.59507e-05	0.174084	0.7	0.59	0.36
SNF1	0.90478	-0.0246454	-0.16864	0.000123231	0.566	0.640111	-0.37	0.02	0.24
HTL1	-4.24376	-0.858265	0.0842513	0.000124005	0.922973	0.456771		0.23	0.45
FOX2	1.08908	0.873902	0.978452	0.000124665	0.144152	0.0047816	-0.02	0.5	0.35
NMA111	-0.909742	0.325036	-0.0672827	0.00012534	0.122897	0.511269	-0.095	-0.16	-0.07
YAL037W	-1.56102	0.95584	1.52851	0.000127581	0.766334	0.894381		0.07	-0.16
NOG2	-1.77483	0.777019	0.139216	0.000127581	0.335736	0.0294087	-0.845	-0.3	-0.42
EDE1	0.871777	-0.257063	-0.613748	0.000128505	0.148945	0.328105	-0.745	-0.49	-0.56
NPT1	-1.1114	0.134718	0.0216631	0.000128511	0.026802	0.0132753	0.13	0.61	0.4
VAM7	1.04014	0.787697	0.613122	0.000128567	0.511575	0.0705589	-0.585	-0.76	-0.72
RTC2	-1.74785	-0.238846	0.787407	0.000131517	0.882493	0.513011	-1.005	-1.05	-1.05
YNL144C	1.01878	-0.717806	-1.29499	0.000131887	0.636256	0.124118		-0.08	-0.01
RAX2	-0.962225	0.555084	-0.259935	0.00013231	0.717549	1	1.165	0.13	0.15
BPT1	0.820802	0.218564	0.0381709	0.000136451	0.218447	0.0144074	-0.76	-0.53	-0.6
RPC82	-0.87224	0.941347	0.463378	0.000136661	0.613026	0.257824		0.01	-0.35
SEC4	1.19623	0.329824	0.848556	0.000137545	0.00446754	0.217165	-0.145	0.22	0.07
STB2	1.16748	-0.676481	-0.679743	0.000140404	0.426301	0.352675	-1.455	-0.78	-0.68
MRPL40	-1.1768	0.178919	0.516483	0.000140496	0.347927	0.614143	-0.325	-0.23	0.02
TVP15	-1.08258	-0.222638	0.300812	0.000141831	0.0893298	0.921094	1.315	0.77	0.84
YDR061W	0.834952	0.498247	0.690171	0.00014228	0.000675877	2.02232e-05	0.35	0.2	0.36
YOR097C	0.84833	-0.212927	-0.332102	0.000144944	9.27316e-06	0.0265162	-0.1	0.13	0.03
IRR1	-0.890276	-0.126569	0.205048	0.000147731	3.38176e-14	1.91351e-23	-0.535	-0.19	-0.29
SHY1	1.04935	-0.866642	-0.333937	0.000147753	0.0048545	0.615571		-0.47	-0.04
FKS1	-0.960171	0.134003	0.11132	0.000148319	0.0439778	0.00368296	-0.325	-0.9	-0.82
PEX15	-1.36432	-0.564922	-0.153379	0.000150551	0.0595538	0.674191	-0.78	-0.7	-0.61
MDS3	0.885752	-0.108106	-0.289172	0.000151065	1.02153e-16	1.13611e-13	-0.85	-0.32	-0.26
RPL34A	-0.883937	-0.482911	-0.681406	0.000151938	0.00192775	3.58502e-12	0.025	-0.28	-0.16
RAD52	0.854585	0.56649	0.577944	0.00015307	0.125624	0.0143524		0.05	0.02
CPR5	0.845114	0.131088	-0.209326	0.000155121	0.000301585	9.27637e-07	0.77	0.89	0.74
ATP19	1.55917	0.323275	1.18204	0.000156461	0.686238	0.841566	2.05	1.52	1.35
VPS8	-0.934353	0.0349133	-0.327587	0.000159545	0.038529	0.312598	-0.365	-0.36	-0.27
YEF3	-1.04067	-0.274584	-0.76914	0.000159545	0.167673	0.106267	-0.36	-0.25	-0.18
HIS4	-0.911309	-2.03565	-1.52881	0.000162519	0.346998	0.000363442	0.465	0.08	0.14
TPA1	-0.857031	0.669836	-0.0163966	0.000162689	0.94141	0.605866	0.195	0.55	0.34
VPS73	1.19986	-0.260832	-1.42563	0.000162835	0.411603	0.928447	0.075	-0.1	0.09
SGA1	1.22106	0.318315	-0.50392	0.000163974	0.000246615	9.12831e-05	-1.1	-1.2	-0.7
SCD5	1.05912	0.651335	1.20225	0.00016436	0.229221	0.893165	-0.005	0.01	0.2
AIM38	0.801721	1.41571	1.33957	0.000167121	0.00184547	1.4697e-08	0.065	0.2	0.31
YGR160W	-2.77185	0.2599	-1.05446	0.000167164	0.0341479	0.764025	0.59	-0.71	-0.5
PUT3	-0.962734	0.0497586	0.179098	0.000167415	0.375652	0.0224322	-0.35	-0.1	-0.26
FRT2	1.34507	0.0959817	0.0145342	0.000168276	0.633847	0.958402		-0.64	-0.2
RCR2	0.79649	0.16223	0.364667	0.000168683	0.0061209	0.0756287	-0.685	-0.61	-0.53
YPR015C	1.74758	0.77436	1.26512	0.000170461	0.627027	0.0572894		0.87	0.53
TDH1	1.5699	1.75794	0.807803	0.00017277	0.0502034	0.00083923	-0.635	-0.43	0.12
RAM1	1.10793	0.628812	0.681707	0.000172936	0.0294834	0.440522	0.465	0.78	0.67
AIM39	0.997716	-0.155845	-0.121465	0.00017303	0.475625	0.920863	0.855	0.69	0.54
DUG2	-0.980975	-0.91525	-1.05721	0.00017303	1.66868e-05	0.106582	-0.15	-0.21	-0.3
PMT4	-1.02425	-0.716517	-1.15268	0.000174016	0.426847	0.0470621	0.56	0.41	0.36
MSS51	0.808287	-0.147334	-0.682497	0.000174097	0.0604671	0.0846109	0.29	-0.06	0.23
GOR1	1.03633	-0.718787	-2.47155	0.000174097	0.524024	0.0709799	-0.7	0.17	0.24
TEM1	0.853192	0.824039	0.563974	0.00017443	0.495401	0.378794	0.14	0.06	0.19
NGL3	1.13103	0.230749	0.168912	0.000175551	0.0306989	0.00380545		-0.32	-0.22
RAI1	-1.28243	0.472597	-0.0467612	0.000175551	0.431033	0.269909	0.11	0.64	0.64
HXT13	1.72471	0.880222	-0.030555	0.000175551	0.686238	0.479371
HAT2	0.837086	0.680419	0.690302	0.000177136	0.00890915	0.452783	-0.105	1.02	0.7
ICT1	0.976215	1.07312	1.37494	0.000178907	0.695072	0.784704		-0.67	-0.33
FUR4	-1.06849	-1.00466	-2.06815	0.000183987	0.0493418	0.722321	-0.58	-0.57	-0.81
TGL1	0.926071	-0.315354	0.354114	0.000183987	0.753151	0.363805	-0.315	-0.42	-0.27
YPR1	0.799991	-0.0912207	-0.322427	0.000184136	0.0676788	0.0304946	0.21	0.2	0.39
PEX29	0.865826	-0.245762	0.0673881	0.000184466	0.0103229	0.0307564	-0.135	-0.29	-0.15
BET5	-1.98023	0.437277	0.568822	0.000185268	0.678471	0.488886	1.2	0.89	0.75
SRY1	-1.15571	-1.96619	-1.6618	0.000185268	0.621157	0.535332	-0.895	-0.39	-0.8
SIT1	-1.12809	-0.532897	-0.683211	0.000189345	0.205902	1.9549e-07	1.745	-0.87	-1.1
YIR042C	-2.68364	-7.62348	-3.32493	0.000191362	0.912948	0.26911		-0.73	-2.1
YDR286C	-1.74705	-0.234109	0.776025	0.000191765	0.342054	0.00523355		0.42	0.59
RRP9	-1.006	0.223217	-0.309685	0.000191765	1.24275e-16	5.61854e-08	-1.18	-0.37	-0.42
RIM1	-2.24775	-0.195945	0.234736	0.000197739	0.00678732	0.994909	1.035	0.57	0.52
YOL118C	-2.43803	-0.411383	0.947214	0.000198224	0.473192	0.000190435		0.04	-0.09
SNF4	-0.994165	-0.387185	-0.201562	0.000198718	0.50801	0.355463	0.69	0.57	0.64
SLA2	0.852204	-0.248834	-0.37441	0.000198732	0.0107294	2.65018e-06	-0.34	-0.1	-0.06
TIM8	-5.38856	1.1815	1.84469	0.00019975	8.78716e-13	4.42198e-09	1.65	1.15	1.01
FUN19	0.882993	-0.142094	0.220387	0.00019975	0.746319	0.133086	-0.455	-0.56	-0.24
DFM1	0.828202	-0.256492	0.0345887	0.000200965	0.862296	0.58725	1.15	1.13	1.13
YBR292C	-3.43711	-0.628816	0.198678	0.000200995	0.919542	1		-0.25	0.02
RPL20A	-1.0444	-0.897258	-0.700136	0.000202641	0.570375	0.168786	0.34	0.02	0.3
HEM14	0.950972	1.17005	0.95037	0.0002035	0.0967503	0.00872777	-0.48	-0.09	0.09
ERG9	0.857606	-0.334309	-0.638438	0.000203979	9.0498e-07	0.034475	-0.425	-0.34	-0.27
RUP1	0.875566	0.528672	0.309032	0.000210627	0.0873876	0.730366	-0.545	0.13	0.23
EDC3	0.813733	0.924054	0.582014	0.000212147	0.0543373	0.0611152	-0.45	0.03	0.05
RSA3	-0.806914	0.921554	0.395973	0.000212827	0.692905	0.772038	0.51	0.95	0.77
ATP11	-1.00931	-0.525967	-0.404352	0.000220545	0.000483873	7.44804e-05	-0.19	-0.08	-0.13
ADR1	-1.167	-1.95433	-2.09825	0.000220545	0.0154837	9.30858e-05	-0.575	-0.86	-0.7
SAC3	-0.983972	-0.587415	-0.717692	0.000221034	0.589285	0.00619978	-0.16	-0.12	-0.1
VPS24	0.96467	0.363036	1.29285	0.000221816	0.00174421	3.05092e-20	0.375	0.29	0.14
MSN1	0.874525	-0.0307499	-0.071577	0.000221967	0.000295082	0.0427731	-0.165	0.09	0.11
COQ9	-1.20024	-0.103013	-0.423773	0.000223361	0.55656	0.696342	0.745	0.31	0.43
ARA2	0.934322	-0.217669	-0.254305	0.000224177	0.0512763	0.915926	0.02	0.11	0.18
YOR022C	1.06683	0.442974	0.273944	0.000229496	0.0698002	0.965439	-0.58	-0.3	-0.12
YJL206C	0.862842	0.895976	1.05803	0.000230858	0.0030019	0.00588812	-0.12	-0.19	-0.18
SYG1	-0.966607	-0.0952719	-0.593254	0.000233835	4.59197e-06	8.78893e-09	-0.81	-0.75	-0.92
AHC1	0.868093	0.847341	1.2378	0.000235397	0.00104066	6.12541e-09	-0.735	-0.66	-0.48
AGP2	0.934276	-1.5362	-1.25994	0.000236278	0.304585	0.278543	-0.78	-1.19	-0.8
SSN2	0.828073	0.377082	-0.24907	0.000239408	0.73609	0.269615	-0.63	-0.37	-0.32
YIR016W	0.925587	-0.456965	-0.725433	0.00024298	0.452438	0.899594	-0.785	-0.52	-0.37
GIS2	-1.00688	-0.892806	-1.34924	0.000245766	0.127486	0.0516675	-0.2	-0.18	-0.2
MSD1	0.993505	0.114248	-0.236818	0.000246065	4.43249e-10	3.87601e-07	0.39	-0.21	-0.15
BUD8	0.805416	0.537046	0.234804	0.000246065	0.0579155	0.0306126	-0.34	-0.1	-0.16
OSM1	0.806421	0.135263	-1.02267	0.000246996	4.38931e-10	5.68816e-06		0.51	0.36
GGC1	-0.94787	-1.13716	-0.471463	0.000247957	0.804304	0.0337788	-0.25	-0.61	-0.64
RBK1	0.851922	0.523126	0.369366	0.000248509	0.488589	0.415155	-0.14	0.22	0.26
RIT1	-1.31415	0.41301	0.211431	0.000253003	0.497516	0.435422		0.09	-0.02
PCS60	0.855464	0.243874	-0.0316101	0.00025505	0.674932	0.0274956	-0.56	-1.03	-0.83
COQ6	1.02351	0.271949	0.0443808	0.000255171	0.202095	0.585063	0.375	0.22	0.33
CSE1	-1.36196	-0.11294	-0.936281	0.000255551	0.345085	0.165124	0.435	0.15	0.22
RPS4B	-0.848139	-0.136939	-0.449578	0.000255791	0.109631	0.0070819	-0.035	0.31	0.28
AFG1	0.8125	-0.197774	-0.26339	0.000257734	0.661193	0.525928	1.375	0.84	0.96
YKR104W	-1.79002	-0.720838	-0.850334	0.000257734	0.31882	0.948903	0.68	-0.04	0.19
TRR1	0.84364	0.572081	0.3941	0.000257734	0.196718	0.346783	0.48	0.83	0.69
LPP1	0.966324	0.241828	0.413129	0.000257734	0.058043	0.882778	1.165	0.49	0.75
VHS3	0.920734	-0.571748	0.251156	0.000258173	0.370595	0.754185	-0.93	-0.51	-0.52
YBR225W	0.898676	0.29679	0.5919	0.000258212	0.0619209	0.00281387	0.075	-0.29	-0.13
RPS6B	-1.4058	0.0558594	-1.07844	0.000260533	0.000275974	0.00903877	-0.435	-0.19	-0.4
YMR099C	0.962388	0.318024	0.281642	0.000262054	1.36537e-06	0.00030939	0.31	0.48	0.45
GCY1	1.13043	-0.750565	-1.70956	0.000263942	0.179701	0.0132583	-0.84	-0.31	-0.09
EDC2	0.86385	0.00148043	0.116709	0.00026511	0.0478449	0.337421	-1.035	-0.51	-0.52
YPL205C	-2.77526	-1.61709	-1.55346	0.00026582	2.52733e-05	0.0217579		0.56	0.37
ATO3	-0.928822	-0.395126	-0.30014	0.000266546	9.15784e-05	0.204404	-0.05	0.4	0.75
YHL044W	1.23961	-0.187566	-0.58471	0.000266641	0.0486666	0.185041	1.23	0.54	1
GTR1	-1.01003	-0.020249	-0.198435	0.000267297	6.97058e-08	7.23733e-09	0.085	0.18	0.09
SYS1	-1.00353	0.164871	0.477803	0.000267416	0.0376264	0.0182277	0.13	0.17	-0.03
RAD26	0.836809	0.466694	0.826595	0.000267654	0.144526	1.26726e-08		-0.29	-0.28
RKR1	-1.36698	-0.153564	-0.333978	0.000271078	1	0.891141	-0.04	-0.18	-0.04
HAP4	-0.999208	-2.19424	-1.83385	0.000271433	0.867655	0.25144	-0.055	-0.07	0.07
BOP3	0.954514	1.17264	0.722789	0.000275588	0.466647	0.533018	-0.06	0.16	0.28
ECM38	0.911157	-0.358909	-0.57762	0.000276914	0.183785	0.521046	-1.955	-1.19	-1.24	NCR
UBX2	0.83258	0.341735	0.126209	0.000279319	8.65641e-05	5.86921e-05	-0.845	-0.13	-0.18
CSR1	0.762457	1.00492	0.787984	0.000280851	0.821	0.0745999	0.15	0.11	0.16
TSA2	1.0977	0.726628	1.32017	0.00028336	0.000547545	1.05677e-06	-0.78	-0.77	-0.5
KAR1	-0.936812	0.306523	0.702736	0.000285091	1.89591e-07	4.91671e-05	0.52	0.56	0.52
RPS19A	-0.848353	-0.606359	-0.227101	0.000298722	0.144606	0.465946	-0.055	-0.12	-0.17
PIB2	0.805212	0.733398	0.688331	0.000298722	0.305452	0.0530303		0.01	-0.06
RTF1	0.938752	1.05047	1.38792	0.000306704	0.000816626	4.72904e-07	-0.1	-0.02	0.01
XKS1	1.11509	-1.68247	-1.50678	0.0003078	0.86404	0.533929	0.325	0.93	0.95
YML079W	0.786848	-0.0386923	-0.224921	0.000314609	0.016513	0.409647	1.03	0.85	0.75
RPT1	0.914359	1.05366	0.428727	0.0003152	0.610476	0.000181195	0.06	0.4	0.09
ARG1	-1.21703	-1.04776	0.704116	0.000316209	2.13619e-05	0.148407	-1.515	-1.45	-1.21
RPC25	-0.950397	0.411305	0.190121	0.000316209	0.0424348	0.21546	0.44	0.74	0.45
FLO8	0.91746	1.15427	1.41286	0.000316849	0.172082	0.650445	-0.21	0.04	-0.09
ILV5	-0.87258	-1.11285	-0.768344	0.000324177	0.382166	0.948572	0.07	-0.92	-0.5
YPL077C	1.00626	0.521557	0.790593	0.000324177	0.394556	0.946164	0.46	0.34	0.26
ANS1	1.89438	5.32518	4.51269	0.000326793	0.826874	0.00985872		-3.14	-2.83
PMC1	0.880376	-0.98035	-0.891865	0.00032958	0.694221	0.113072	-0.965	-0.95	-0.86
UBC8	1.12	-0.867742	-0.0781574	0.000331057	0.441991	0.374858		-0.26	-0.35
LEA1	-0.884536	0.455107	0.346503	0.000334748	0.0401736	0.694836	-0.37	-0.51	-0.55
RPL9A	-0.859036	-1.16228	-1.01621	0.000336108	0.107165	0.0600471	0.38	0.45	0.16
IKS1	1.0322	-0.0430936	-0.459118	0.000336108	0.0191921	0.201031	-0.28	0.19	0.19
RSC58	-0.832981	0.0204281	0.421743	0.000336175	0.447194	0.25244		0.34	0.26
NOC4	-1.7521	0.497124	-0.251762	0.000339319	0.0548005	0.552987		-0.39	-0.41
NMA2	0.824726	0.490575	-0.0956454	0.000339574	0.346562	0.0712366	-0.11	0.6	0.5
KAR3	-0.893379	-0.131163	-0.136788	0.00035144	0.887572	0.00561529	0.1	0.09	-0.06
BCP1	-0.889902	0.566886	0.577936	0.000355054	0.247633	0.426399	-0.6	0.42	0.08
PRP40	0.829005	0.747472	1.13908	0.000355972	0.0125423	2.67281e-08	-0.24	0	-0.14
YPR147C	0.917583	0.815095	0.723859	0.000356766	1	0.749497	0.365	0.27	0.42
NOP10	-0.939817	-0.421086	0.104169	0.000357785	0.0150575	0.0406879	0.97	0.88	0.67
ROD1	0.95684	-0.563336	-0.252933	0.000367729	0.155526	0.370586	0.01	-0.36	-0.13
BDH2	0.977926	-2.42881	-2.70885	0.000371342	0.547508	0.208487	-2.195	-2.47	-1.58
HNM1	-0.851088	-0.982476	-1.20811	0.000371981	1	0.614832	0.065	-0.77	-0.71
FMP10	0.971822	0.0385446	-0.109374	0.000373799	0.608327	0.127843	0.655	0.4	0.54
ERG11	-0.946743	-0.289287	-0.464908	0.000382837	0.0801223	0.0013934	-0.17	-0.8	-0.5
ECM10	1.04899	1.1856	1.15587	0.000385432	1	0.0631574		-0.98	-0.56
TRM44	-1.24505	0.45703	0.13996	0.000385432	0.73609	0.454871	-1.35	-0.31	-0.35
TRM7	-1.01245	0.268518	0.0390448	0.000385432	1.56549e-19	2.16213e-11		0.04	0.02
ESC1	0.875396	0.384985	0.644783	0.000385622	5.48114e-07	0.00717486	-0.355	-0.3	-0.26
CPA2	-1.17578	-1.28189	-0.663751	0.000389762	0.223641	0.0744441	-0.08	0.07	-0.31
RPO26	-0.77271	-0.154707	-0.283912	0.000390595	0.206938	0.729288	0.505	0.22	0.23
YKL047W	-1.10734	-0.10152	-0.466353	0.000390872	8.80918e-07	0.000962274	-0.18	0.38	0.29
EMP70	-0.875514	-0.0123706	0.0572999	0.000391507	0.00846466	1.84417e-07	0.12	0.15	0.12
SNF8	0.77306	0.382754	0.253538	0.000392651	0.20049	0.00463602	0.29	0.53	0.4
TIF3	-0.92571	-0.325861	-0.306723	0.000392651	0.0112803	0.450437	-0.515	0.19	0.03
EPS1	0.787527	0.576544	0.196071	0.000394039	0.00252165	0.00530697	-0.49	-0.28	-0.3
SEN1	-0.837161	-0.907703	-0.635084	0.000394624	0.000102993	2.66207e-07	-1.275	-0.69	-0.58
RPS0B	-1.00865	-0.875328	-1.1202	0.000395601	1.7779e-06	0.000274324	0.025	0.07	0.11
MSH5	-1.49828	-0.128589	-0.719507	0.000397663	0.936022	0.485231	0.01	-0.25	-0.18
WBP1	-0.909456	0.0209322	-0.123914	0.000398354	1.46575e-05	0.161625	0.275	0	0.24
BUL1	0.771312	0.426673	0.418882	0.000398599	0.0566456	0.000446207	-0.12	-0.01	-0.06
ABM1	1.27415	-0.403443	0.124877	0.000403778	0.00120559	0.0270362
RPS29A	-1.60026	-0.713929	-1.20852	0.000419822	0.0853512	0.535691	0.805	0.31	0.28
TES1	0.888593	0.229704	0.692073	0.000422248	4.00589e-07	2.39369e-07	-0.215	-0.04	-0.14
MIG3	0.781489	1.40182	0.790564	0.000422494	4.63225e-05	0.00415832	1.245	0.28	-0.04
RPL15A	-0.951931	-1.02456	-1.63228	0.000423109	0.0663773	0.00528598	-0.115	0.88	0.47
UGA2	0.914877	-0.300551	-0.647051	0.000430488	6.40491e-85	3.42394e-39	-1.755	-1.03	-1.07
NEM1	0.918315	-0.258582	0.323554	0.000437682	0.000171133	0.000305247	-0.28	-0.12	-0.16
PTK2	0.960966	-0.938189	-0.649391	0.000437682	0.0173962	0.87227	-0.38	-0.37	-0.12
BAT2	0.847107	0.738462	1.61597	0.000442421	0.0719792	0.202266	0.185	0.88	0.7	NCR
SSA4	-1.01088	0.517008	-2.03381	0.000442421	1.79009e-06	0.000122882	-2.36	-2.02	-1.8
YHL012W	-3.57674	-2.2059	-1.31717	0.000442869	0.949205	0.332952		0.78	0.44
RPS19B	-0.882219	-0.753421	-1.31417	0.000442888	0.96505	0.115733	0.65	0.23	0.24
UBP7	0.744917	0.0493526	0.103753	0.000444122	0.292172	0.722605	-0.58	-0.34	-0.48
ERG8	0.7561	0.59743	0.665833	0.000445639	0.0604711	0.816839	0.26	0.66	0.62
SCD6	0.729449	0.830247	0.343356	0.000448948	0.72049	0.744704		0.38	0.5
YML082W	-0.905422	0.207896	-0.273141	0.000450237	0.011878	0.0195266	-1.03	-0.52	-0.35
YKL222C	0.917516	0.941867	0.811025	0.000451105	0.00117601	2.25345e-06	0.465	0.46	0.37
SRO9	-0.852278	0.910715	-0.145502	0.000452222	0.000189714	0.00713364	-0.29	-0.33	-0.13
IES6	0.825798	1.33542	1.75331	0.00045599	0.141025	0.806463	-0.105	0.74	0.45
ERV2	1.09917	1.02777	0.807187	0.000461954	0.119976	0.543055	-0.63	-0.1	-0.3
SWI5	-0.768406	-0.663376	-0.549691	0.000462547	3.49947e-16	3.42442e-12	0.3	0.17	0.2
NAB6	0.833973	0.017131	-0.0112577	0.000466701	0.000132087	2.42336e-05	-0.4	-0.27	-0.28
YGR127W	-1.0559	-1.10954	-0.74828	0.000470914	0.9493	0.791635	-0.165	0.35	0.43
ULP1	-0.857149	-0.323983	-0.145695	0.000474754	0.377992	0.155381	0.29	0.26	0.13
YIP5	0.852846	0.135794	-0.0846652	0.000477995	2.54969e-05	0.000158174	0.445	0.53	0.2
RPC31	-0.790859	0.538948	0.364489	0.000486534	0.0503318	0.717986	0.27	0.94	0.74
DPB2	-1.00861	-0.598869	-0.787626	0.000487071	0.287515	0.899741		0.53	0.34
ZRT2	-0.821913	-0.699821	-1.29563	0.000493472	0.166305	0.0243209	0.03	-0.2	-0.13
SEC22	0.737086	0.538931	0.405787	0.000506615	5.71831e-06	0.0449183	0.345	0.12	0.13
TGL4	0.843959	-0.278158	-0.56587	0.000517381	0.154154	0.0294785	-0.18	-0.28	-0.06
APL5	-0.85129	-1.065	-0.89202	0.000517381	0.657941	0.336157	-0.385	-0.42	-0.36
TRR2	0.822398	0.305789	-0.0459372	0.000521466	0.920067	0.185547	-1.215	-0.45	-0.29
YNK1	1.03363	-1.06049	-0.430101	0.000524913	0.99033	0.887348	0.04	0.41	0.52
YLR173W	0.837272	-0.0306577	-0.176303	0.000529929	0.132006	0.378794		-0.85	-0.84
YKL066W	1.43393	-0.780149	0.870848	0.000533902	0.268016	0.331789
CCH1	-0.902373	-0.0169805	-0.630988	0.000533902	0.013789	0.549142	-0.69	-0.83	-0.93
DCP1	-1.00526	-0.821915	-0.679324	0.000534476	0.000483607	0.0282214	0.71	0.5	0.28
YOR292C	1.09007	-0.689091	-0.496184	0.000543863	0.00122771	4.0546e-05	0.275	-0.15	0.1
TOP2	-0.837303	-0.49956	-0.0709991	0.000547013	0.947587	0.107546	-0.01	0.08	-0.13
VNX1	0.749416	-0.398343	-0.434519	0.000547996	0.961694	0.774586	-0.15	-0.95	-0.74
YPL245W	-1.06295	-0.670624	-1.19029	0.000547996	0.0853512	0.120336	0.465	0.26	0.21
UFE1	-1.08321	0.226241	0.538943	0.000550675	0.384487	0.865104	0.495	0.08	0.12
LAP4	-0.948853	-1.55927	-2.86974	0.000557082	0.149595	0.0172755	-1.32	-0.65	-0.7	NCR
AIM18	0.755324	-0.246417	-0.208102	0.000561439	0.404197	0.00658456	0.5	0.29	0.58
PIG2	1.02669	-0.620484	-0.489663	0.000564141	3.45887e-11	0.00103366	-0.75	-1	-0.75
FMP23	-2.64913	-0.133689	0.30683	0.000566521	2.90395e-05	4.62188e-10		-0.8	-0.58
PRP45	0.877837	0.632234	0.54402	0.000573105	0.324535	0.0616615	-0.53	-0.44	-0.47
ACH1	1.04337	-1.30808	-1.71584	0.000573105	0.424566	0.395653	-0.015	0.51	0.48
ZEO1	1.29489	0.50541	1.79918	0.000573105	0.00276056	0.0538747	0.61	0.7	0.55
SIR1	0.882672	0.423272	0.745028	0.000573438	0.00167272	2.41015e-12		0.02	-0.11
SLX5	0.743412	0.783299	0.855036	0.000574942	0.0484479	8.61975e-14	-0.335	-0.28	-0.34
TMA64	-0.883908	0.358349	0.469211	0.000578904	0.0160309	0.118427	0.23	0.56	0.57
RPL27A	-0.832295	-0.528582	-0.486121	0.000587417	0.00480683	7.5579e-07	0.28	0.14	0.01
SGD1	-1.20366	0.330648	0.197494	0.000587455	0.88866	0.760639	-0.345	-0.11	-0.27
CWP2	1.26842	1.36296	2.12233	0.000592486	0.00880433	0.00681513	0.915	-0.32	-0.01
YNL058C	-0.775247	-2.14929	-1.89133	0.00059286	9.28511e-05	0.188415	0.47	0.24	0.4
LRO1	0.810434	0.218479	-0.315461	0.000611033	0.450399	0.451208	-0.985	-0.28	-0.26
TDP1	0.997693	0.769379	0.573162	0.000613053	0.000248907	0.00622156	-0.355	0.01	-0.18
PIB1	0.725362	0.178049	0.458357	0.000623468	0.000442878	0.747714	-0.43	0.54	0.32
UBP11	-1.3452	-0.92618	-1.41848	0.000625595	8.28738e-10	6.14032e-16		0.14	0.01
FET3	-0.877585	-0.509287	-1.09883	0.000636424	0.00206567	0.0346471	2.34	0.52	0.42
ROT2	0.777238	0.357052	-0.0660551	0.000639755	0.0216882	0.0336425	-0.565	-0.4	-0.43
TRM2	-0.862509	1.01349	0.529088	0.00064	0.982174	0.993391	-0.31	-0.22	-0.15
CUE4	1.13627	0.085049	0.559904	0.000643233	0.000317707	0.0234597	0.895	0.69	0.42
LHS1	-0.834273	-0.35796	-0.426993	0.000644133	0.259295	0.671987	-0.62	-0.46	-0.59
DIG1	0.875199	1.14736	1.29262	0.000644133	0.686751	0.828704	-0.96	-0.29	-0.06
ZRC1	-0.838337	-0.306523	-1.10928	0.000644133	0.0242275	0.205842	0.705	0.25	0.17
PIL1	0.828633	-0.522619	-0.853105	0.000645037	0.0352114	0.0113034	-0.73	-0.07	0.09
YPR071W	1.02244	1.29573	1.12316	0.00065605	0.010547	3.67556e-06		0.43	0.51
GAL83	0.862771	-0.0164698	-0.057293	0.000657304	0.0305127	0.111189	-0.63	-0.04	0.01
FTR1	-0.784605	0.0187951	-0.502404	0.000660593	0.358278	0.0447227	1.155	0.05	0.04
PET123	0.796181	0.296377	0.443887	0.000664167	7.22588e-05	0.00183699	0.465	0.03	0.05
INP54	0.832375	0.22856	0.613581	0.00066486	0.346062	0.956152	-0.215	0.3	0.26
SLF1	-1.20275	-0.0757531	-0.148755	0.000666808	5.13149e-05	0.229841	0.25	-0.56	-0.52
ZPR1	-0.872893	0.182205	-0.691542	0.000666934	0.924012	0.677553	-1.565	-0.79	-0.87
YMR160W	0.85131	-0.0506929	0.233309	0.000670641	0.138299	0.118579	-0.62	-0.26	-0.16
TIF4631	-0.831514	0.0440193	-0.63591	0.000675345	1	0.04903	-0.62	-0.29	-0.27
RRP45	0.852278	1.20011	1.59254	0.000675345	0.000741995	0.0163006	0.48	0.38	0.37
COQ5	0.783179	-0.332635	-0.741747	0.000675345	0.0572217	0.25144	0.455	1.22	1.17
PDX1	0.807456	0.512071	0.26499	0.000677199	0.0765457	0.873149	-0.1	-0.34	-0.18
PIM1	0.743199	0.341179	-0.0507524	0.000681231	0.0894609	0.111054	-0.525	-0.31	-0.29
GLC8	0.943604	0.408995	0.532827	0.000682656	0.0365851	0.000753823	0.105	0.51	0.41
RGD2	0.804349	1.36017	1.49817	0.000683413	0.429613	0.118131	0.205	0.45	0.28
MPM1	1.09025	-0.483289	-0.866136	0.000687325	3.07793e-08	8.1057e-20	-0.685	-0.07	0.01
CHA4	0.80294	0.466557	0.663983	0.000690323	0.396581	0.576535	0.475	-0.01	-0.17
UBP15	0.816507	-0.446567	-0.481269	0.000695745	0.0765459	0.232111	-0.735	-0.52	-0.43
NPC2	0.818782	-0.322555	-0.734366	0.000704127	0.911301	0.569111	0.41	0.09	0.26
YDR352W	-0.814434	0.120763	0.16847	0.000706604	0.0132337	0.0439579	-0.615	-0.74	-0.82
PEX12	0.809545	1.06058	1.17652	0.000708874	8.18271e-09	7.35634e-12	-0.16	0.29	0.06
FAR8	0.848736	0.25633	0.0779463	0.00071107	0.184312	0.000119601	0.205	0.13	0.02
RPS4A	-0.832997	-0.195104	-0.012198	0.000715681	0.113396	0.00535195	0.145	0.33	0.32
CLU1	-0.834437	-0.489919	-0.874375	0.000718398	0.000171716	0.000337422	0.07	0.17	0.11
LSG1	-0.789146	0.62244	-0.2986	0.000720076	0.15815	0.0709799	-0.575	0.06	-0.01
NAT5	-1.78389	0.170187	0.350757	0.000720076	0.0518538	0.0988411	0.5	0.67	0.41
YTP1	0.871152	-0.52356	-0.396146	0.000722996	0.298158	0.693846	-0.485	-0.84	-0.47
IQG1	-0.803991	-0.678051	-0.570784	0.000737476	2.94883e-05	3.35576e-09	0.14	-0.25	-0.25
MLC2	0.790166	-0.00906587	0.0283202	0.000746951	5.69955e-18	2.18987e-13	0.9	0.57	0.45
ECM25	-1.00082	-0.302441	-0.265376	0.000754506	0.424566	0.274853		0.32	0.32
PEX30	0.832053	0.278715	-0.224614	0.000754506	0.0103685	0.118427	-1.135	-0.39	-0.4
IDP3	1.18262	1.88265	1.50241	0.000754506	0.507435	0.103721		-1.35	-0.95
YNL295W	-0.927241	-0.167903	-0.330217	0.00075526	0.019085	0.000863249	0.34	-0.22	-0.35
YLR112W	-0.91801	-2.05327	-1.59999	0.000759172	0.0688669	9.03272e-05	1.06	0.59	0.13
HBN1	-1.37577	-2.22666	-2.67406	0.000761649	0.176658	0.891468	1.905	0.7	1.06
VPS33	-0.863566	-0.472381	-0.422518	0.000761649	2.80428e-05	0.091866	-0.075	0.11	0.2
PAN2	-0.834757	0.0894273	0.0299397	0.000777896	0.742601	0.0455909	-0.385	-0.43	-0.44
DBP8	-0.975357	0.968697	0.618426	0.000784757	0.179278	0.14248	-0.37	0.02	-0.02
RPP2A	-0.829803	-0.886482	-1.40095	0.000793949	5.52893e-07	8.75396e-08	0.085	-0.01	0.23
SPC105	0.84666	0.409117	0.550358	0.000806471	0.308918	2.49266e-05	-0.3	-0.47	-0.51
SYT1	0.760051	0.176563	0.626392	0.00080962	0.0462176	0.00332062	-0.185	0.13	0.03
RFC5	-1.29273	0.11695	-0.213756	0.000813848	2.24904e-07	9.5863e-05	-1.86	0.17	0.12
TPM2	0.913022	0.771014	0.82328	0.000817727	0.946815	0.882778	1.62	1.17	1.1
RVS161	0.879092	0.138768	0.282881	0.000820275	0.970964	0.0714338	0.43	0.41	0.35
EST1	-1.24899	0.0903816	-0.272102	0.000824702	0.297402	0.122529	-0.275	0	-0.06
SHR3	-0.844072	-0.75414	-0.334579	0.000830788	0.52134	0.0601306	0.11	-0.02	-0.11
YNL171C	-6.00635	-1.3745	-0.251202	0.000834535	0.80899	0.777365		-0.04	0.45
ARC18	0.779973	-0.162112	-0.420144	0.000852152	0.550349	0.0339301	0.42	0.36	0.26
JIP5	-0.802593	0.394611	-0.104308	0.00085412	1	0.497717	-0.71	-0.62	-0.55
FAB1	0.719087	0.739169	0.211125	0.000858159	0.909097	0.0290026	-0.64	-0.22	0.12
SML1	0.944358	0.589266	1.29128	0.000879781	3.92043e-06	4.39633e-09	1.215	-0.05	0.24
MTR10	-0.756155	-0.416598	-0.59354	0.000884374	0.214076	0.00953367	-0.15	-0.31	-0.24
BRR2	-0.727683	0.334397	-0.0812337	0.000886841	0.0419231	0.392622	0.45	-0.05	0.07
RPS3	-0.836845	-0.908793	-0.96825	0.000886841	0.169591	0.89546	-0.015	0.29	0.22
YGR237C	0.854823	-0.513497	-0.553839	0.000891831	0.206938	0.0903193	-0.64	-0.44	-0.15
MSC6	-1.15049	-0.405053	-0.098837	0.000901987	8.34102e-11	7.63488e-11	0.025	-0.21	-0.1
GCD7	-1.03666	0.511412	0.0336431	0.000904298	0.268992	0.0300183	0.22	0.14	0.17
PMP2	-1.64069	0.711789	0.676947	0.000909704	0.101355	0.0157765	0.85	0.18	0.32
YBR238C	-0.820554	1.23417	0.562691	0.000909704	0.0581403	0.0830602	0.57	-0.29	0.18
PHO13	-0.769973	-0.337773	-0.217826	0.000909704	1.73773e-06	2.64621e-08	0.775	0.43	0.14
YPR130C	2.67676	0.802011	2.88981	0.000914543	0.252132	0.0507749		0.67	0.64
TOF1	-0.911362	-0.287026	-0.179494	0.000922294	0.251469	0.00669996	-0.21	0.1	-0.05
GPI11	-1.21931	-0.362812	-0.0883275	0.000922294	0.699171	0.62664	0.54	0.8	0.73
SCW4	0.778733	0.852603	0.0366334	0.000925863	1.80753e-07	6.29635e-07	1.625	0.72	0.79
SUE1	1.2322	0.139583	-0.113531	0.000925863	0.437419	0.889005	-0.4	-1.01	-0.84
YNL276C	-2.28834	-3.4562	-5.5942	0.000927301	0.524024	0.994527		-0.13	-0.23
URA5	-0.711092	-0.360853	0.201346	0.000927538	0.0876256	0.00226248	0.325	0.25	0.2
YDL176W	-0.894577	0.398741	0.250744	0.000944456	0.00934911	0.457249	-0.235	-0.29	-0.45
TIF4632	0.868692	0.430493	-0.0634566	0.000944456	0.49988	0.186117	-0.28	-0.16	-0.07
YMR317W	0.843989	0.553937	0.394838	0.000946253	0.0711307	0.220864		-0.06	-0.14
CTS2	0.918975	-0.0244997	0.276072	0.000946957	0.00422422	0.0292995		0.21	0.05
OTU1	0.864978	0.518306	0.200206	0.000947989	0.982174	0.965439	-0.24	-0.26	-0.56
PIN3	0.83726	0.131799	0.607966	0.00096992	0.417406	0.491536	-0.19	-0.34	-0.1
SBP1	0.795435	0.236102	-0.391666	0.000970256	0.373971	0.526769	0.2	0.47	0.6
YSH1	-1.00483	0.197864	-0.154263	0.00097594	6.70684e-10	0.000194307	-0.135	0.32	0.2
RPN14	0.801232	0.374085	0.0110808	0.000976475	0.574792	0.279075	0.18	0.2	-0.04
ATP7	0.869005	0.0555521	0.0147777	0.000991077	2.31141e-13	5.322e-08	1.23	1.32	1.11
SWS2	0.907459	0.316341	0.561699	0.000995233	2.31653e-08	9.38908e-08	0.84	0.28	0.56
CDC39	-0.854331	-0.207848	-0.496334	0.00100705	0.0694831	0.159835	-0.74	-0.75	-0.55
ALG1	0.80964	0.462318	0.52321	0.00101301	0.76536	0.935965	0.345	0.15	0.06
RPB2	-0.785904	-0.608832	-1.19506	0.0010133	0.000292565	0.0947684	-0.11	0.1	-0.06
YPL182C	1.20614	0.910613	0.506222	0.00102063	0.000424593	1.59136e-05
POL4	-0.982254	-0.0505591	0.346995	0.00103006	0.088752	0.0312309	-0.51	-0.48	-0.37
MCD4	-1.10937	-0.674672	-0.758299	0.00103077	0.515597	0.0125776	-0.06	-0.09	-0.16
SPT14	-1.03705	-0.0697677	-0.440943	0.00103128	0.714657	0.721396	-0.2	0.13	0.13
TOM70	-0.77291	0.0114675	0.0156212	0.00103209	0.00934783	0.00670056	0.065	0.12	0.25
HEF3	0.910047	2.5213	1.31293	0.00103538	0.707781	0.448512	-2.87	-3.17	-2.8
YBR085C-A	0.851144	-0.872328	-1.34193	0.00103877	0.732959	0.602861	-0.35	-0.38	-0.17
MRP2	-1.44458	-0.30335	0.666305	0.00103957	0.00352138	0.285493		0.42	0.35
CBS2	-1.15154	-0.110421	-0.0650356	0.00104041	0.348937	0.924978	-0.1	0.29	0.4
YDR154C	1.52257	-0.134435	1.03261	0.00104944	0.573069	0.129818	-0.53	-0.52	-0.33
YKL050C	0.778399	1.17433	0.531606	0.00105473	0.111142	0.802093	-1.87	-1.75	-1.7
RPL6B	-0.817893	-0.225693	-0.108215	0.0010629	0.000450888	0.46362	0.025	-0.08	0
ARC19	0.802659	-0.0367775	-0.0276426	0.00106337	0.0230657	2.91894e-07	0.985	0.85	0.71
UBX6	0.793877	0.467276	0.569004	0.00107474	0.0768885	0.0212759	-0.035	-0.03	0.23
EMP24	0.936051	-0.741244	0.0991747	0.00108994	0.188227	0.840781	0.645	0.23	0.1
EMC2	-0.76935	-0.107994	0.369026	0.00109779	0.000576975	0.000776465	0.37	0.3	0.22
SPC42	-0.933646	-0.654974	-0.607917	0.00111638	0.124615	0.0721186	0.9	0.55	0.54
ARG2	-0.917787	-0.189788	-0.148552	0.00112729	0.158853	0.844996	-0.445	0.06	-0.12
SEC31	0.774471	0.0459157	0.354565	0.00112844	0.0391086	0.928187	0.785	-0.65	-0.55
RPS18B	-0.834549	-0.63703	-0.448541	0.00112874	0.212947	0.253659	0.46	0.66	0.54
HIP1	-0.718129	-0.0316356	0.010686	0.0011389	8.30548e-07	0.0614561	0.91	0.41	0.6
LYS21	-0.909107	-0.565467	0.140581	0.00114609	0.185436	0.504082	-0.43	0.15	-0.01
RPS1A	-1.01156	-0.995661	-1.2125	0.00115011	0.636256	2.24544e-07	-0.06	0.3	0.12
KIN3	-0.811936	-0.493259	-0.777224	0.00115558	0.725097	0.721396		0.29	0.39
YBR096W	-1.32689	-0.400994	0.164322	0.00116756	0.0118695	0.00408204		3.37	3.26
THR1	-0.76672	-1.02594	-0.953575	0.00117494	0.322777	0.621653	-0.01	0.14	0.09
COX13	0.905787	-0.0339289	0.565665	0.00117691	0.228264	0.882845	0.43	0.74	0.56
CSR2	1.02324	-0.158601	-1.15026	0.00117691	0.000270155	0.927694	-1.97	-1.96	-1.32
RPP0	-0.804308	-1.17337	-0.514563	0.00117691	0.745616	0.934155	0.105	0.14	0.01
RPL40B	-0.948235	-0.445128	0.387567	0.00117693	8.77703e-08	7.51577e-10	-0.065	0.28	0.11
GUS1	-0.755628	-1.1516	-0.768311	0.00117835	0.149676	0.509672	-0.88	-0.21	-0.32
TCM62	0.823593	0.598184	0.850719	0.00119257	0.121177	0.380926		0.46	0.4
HXK2	-0.857917	-1.9308	-2.24984	0.00119257	0.0694831	0.88465	0.44	-0.07	-0.24
OLA1	-0.757626	-0.972771	-1.69989	0.00119575	0.0408669	0.195841	-0.785	-0.42	-0.26
BIG1	-0.98379	-0.308706	0.0615724	0.00119575	0.917787	0.502024	-0.325	-0.01	0.08
YHR112C	-0.91057	-1.75928	-2.511	0.00119898	0.0818315	0.6274	0.2	1.17	1.02
SOM1	1.27738	1.02372	0.391355	0.00120269	0.654378	0.0203377	-0.935	-0.82	-0.77
YPL238C	-1.07046	-1.35618	-2.14477	0.00121312	0.426847	0.208775	0.28	-0.28	0.06
FLC2	-0.761515	-0.362251	-0.691041	0.0012166	0.478538	0.72975	-1.055	-0.91	-0.87
YLR143W	-0.945484	0.394473	0.367862	0.00122179	0.198125	1	-0.39	0.57	0.44
RPC19	-1.12719	0.203523	-0.154658	0.00123054	0.892081	0.984879	0.3	0.17	0.1
DML1	-1.09705	0.346396	0.666923	0.00123396	0.24561	0.0258927	0.11	0.54	0.33
PGA3	-0.784791	0.343842	0.195698	0.00124042	0.557113	0.132833	-0.37	-0.08	-0.33
KGD1	0.800836	-0.632132	-1.03351	0.00125623	0.0965682	0.0727173	-0.205	-0.32	-0.21
PRY2	0.813342	1.73781	1.37206	0.00125702	0.0179315	1.65614e-05	0.295	-0.23	-0.02
PHO23	0.792925	0.346854	0.233572	0.00126055	0.00109234	0.285691	-0.115	0.16	0.1
RDS2	0.863474	0.608681	0.641871	0.00126055	0.929731	0.22924	-0.4	0.12	-0.15
PTA1	0.758771	0.314131	0.305376	0.00128713	0.0677682	0.0526281	-0.39	-0.48	-0.37
YDL199C	0.800538	-0.591637	-0.128737	0.00129686	0.959122	0.199718	-0.27	-0.63	-0.35
ADH5	-0.94556	-0.972618	0.464308	0.00130699	0.977114	0.979646	0.31	-0.48	-0.26
RSM18	-0.868322	-0.246385	-0.246732	0.00130937	6.35779e-29	2.23468e-07	1.22	0.64	0.46
HOR7	1.19196	-0.887331	-0.266165	0.00131256	0.00254632	1.67925e-06	-0.74	-0.21	-0.16
LAS1	-0.829199	0.912427	0.764771	0.00131723	0.377992	0.0498332	-0.515	-0.02	-0.25
UFD1	0.78849	0.728721	0.62036	0.00131769	0.865473	0.926783	-0.31	-0.55	-0.37
YKL107W	1.24198	0.574825	-0.442291	0.0013224	0.624324	2.66199e-05		-3.05	-2.36
ALG8	-0.758043	-0.151885	-0.229373	0.00134954	6.37068e-09	0.0414132	0.63	0.61	0.57
MBA1	-1.1815	0.0888134	0.233552	0.00135581	0.444344	0.771484	1.16	0.48	0.62
APC11	2.04979	1.15062	2.88624	0.00136503	0.941769	0.958402	0.78	0.67	0.4
APC4	-1.09308	0.0880669	0.251536	0.00138418	0.0491415	0.0280753	0.065	0.12	0.16
NAM2	0.762116	-0.0429626	-0.122133	0.00138684	0.0354942	0.893417	-0.6	-0.26	-0.2
YOR055W	1.58746	-0.219471	-1.9496	0.00140737	0.798442	0.169788		-1.07	-0.74
SAM4	-0.940785	-0.544953	0.186765	0.00145436	0.0197733	0.0469916	0.55	0.87	0.62
YPR174C	-0.806457	-0.800207	-0.437758	0.00146199	0.546049	0.720779	-0.04	0.1	-0.11
SPP41	-0.853049	-0.472013	-0.43875	0.00147143	0.897919	0.212114	-0.595	-0.25	-0.37
NPL3	0.85057	1.40158	0.932521	0.00147576	0.0133986	0.120044	-0.57	0.19	0.48
LRP1	-0.893116	1.28166	1.56268	0.00148502	0.919685	0.984879	-0.13	0.04	0.14
YOR015W	-2.05675	-0.888716	0.858294	0.00148722	0.0326752	0.696844	-0.825	-0.47	-0.47
ATP16	0.78134	-0.385757	0.159003	0.00148722	0.000214111	1.60641e-05	1.365	1.18	1.02
CWC27	0.847474	0.541118	0.912003	0.00149809	0.0459046	0.00561907	0.285	-0.04	-0.09
NAR1	-0.726477	0.509929	0.189625	0.00149809	0.238597	0.713403	-0.84	-0.25	-0.53
DIB1	-1.72287	0.0881472	0.194261	0.00150085	1.95611e-05	0.000333943	1.02	1.08	0.95
ADE6	-0.801042	-0.883155	-1.55999	0.00150861	0.943198	0.0369889	0.28	-0.25	-0.13
UBC5	1.28237	-0.358761	1.07437	0.00151215	0.832104	0.0204288	-0.46	-0.1	-0.05
PPG1	0.807266	0.407537	0.402861	0.00152535	2.57252e-06	0.0727582	0.54	0.43	0.49
NEO1	-0.87391	0.195796	0.0800027	0.00152535	0.154252	0.277239	0.365	-0.5	-0.23
YPT53	1.14129	0.0778003	-1.03327	0.00152563	1.30762e-06	0.00444305	-1.73	-1.11	-1.08
SPS19	1.23341	0.774722	0.720442	0.00154253	0.0345228	0.00235539	-0.505	-0.57	0.25
SPS100	-1.0265	2.60808	-0.527782	0.0015523	5.35088e-13	9.86535e-15		-2.69	-2.49
TRM112	-0.737721	0.215826	-0.193426	0.00155464	7.71595e-05	8.88463e-10	0.495	0.27	0.29
VPS3	-0.790256	-0.696949	-0.704311	0.00155896	0.388333	0.89647	0.21	-0.13	-0.15
RAV1	0.757507	0.21814	0.15396	0.00156796	2.05771e-15	1.99779e-23	-0.1	-0.08	-0.02
TRX2	1.15483	-0.260256	0.526324	0.00157349	0.00519948	0.48017	0.355	-0.13	-0.11
CBF2	-0.710741	0.00782675	0.164873	0.00157824	0.000161941	3.25483e-08	-0.16	-0.03	-0.22
PBN1	0.816289	-0.132318	0.231125	0.00157824	0.223618	0.0218862	0.085	-0.05	0.07
GYP6	-0.907215	-0.654932	0.267459	0.00157824	0.164172	0.248494	-0.33	0.27	0.2
YCR001W	-3.21005	1.12389	1.21016	0.00158119	0.557851	0.763885	0.31	0.02	0.13
STE2	1.5183	3.3066	2.02843	0.00159873	0.261429	0.0215034	3.215	3.36	2.93
ACO2	-1.03509	-0.0187047	0.0829542	0.00160217	0.170144	0.507947	-0.165	0.38	0.19
YNL211C	-3.9902	0.0674299	0.674449	0.00161258	0.0162399	0.000211002		-0.2	-0.11
RPS20	-0.769987	-0.951391	-0.618561	0.00161483	1.33019e-12	2.67295e-07	-0.145	0.53	0.2
MCM1	0.768252	1.00305	1.10792	0.00161483	0.205725	0.494613	-0.595	-0.41	-0.11
BMH2	0.728246	-0.316861	-0.0868008	0.00161483	0.0116758	0.0172755	-0.86	-0.19	-0.12
YJL070C	0.763971	-0.89858	-0.837091	0.00163191	0.210503	0.286956	-0.78	-0.56	-0.49
MOD5	0.702137	1.46964	1.55465	0.00165053	0.0412667	0.817927	-0.11	-0.28	-0.41
BAP2	0.836799	1.10337	0.350723	0.00165067	1.05464e-07	0.00121239		-3.16	-2.93
MCM2	0.69637	0.754688	0.782225	0.00165067	0.000566418	0.150408	-0.05	-0.14	-0.21
YJL156W-A	-6.02717	-0.134126	0.289433	0.00165346	0.403739	0.440522		0.16	0.17
ZRT1	-0.958127	-1.10438	-0.912824	0.00165493	0.0013023	0.537974	0.155	-0.15	-0.23
PTP1	0.968343	-0.178943	0.0358223	0.00167718	3.7082e-05	0.00178733	0.52	0.66	0.72
STE14	0.842777	0.988521	1.07767	0.00167871	0.00443307	0.0257886	1.08	0.32	0.28
PMT3	0.753726	-0.0334198	0.0664674	0.00168204	0.228264	0.520303	-0.465	-0.18	-0.08
YEL020C	0.826157	0.323618	-0.113398	0.00168478	0.577495	0.445536	-0.685	-0.44	-0.28
HSP31	0.765176	0.804264	-0.100193	0.00168478	0.791346	0.519749	-0.945	-0.78	-0.37
NDI1	0.856407	-0.998735	-1.39316	0.00168841	0.188227	1.4665e-05	0.2	0.19	0.29
RAD50	-0.88114	0.798605	0.611219	0.00172245	0.823535	0.551656	-0.225	0.08	-0.08
PTC6	0.712712	-0.908571	-0.996482	0.00173009	0.867863	0.724364	-0.37	-0.56	-0.42
GFD1	-0.801522	-0.740854	-0.529925	0.00173129	0.87799	0.0624001	-0.755	-0.74	-0.73
YNR025C	-2.72833	-0.109655	0.177047	0.00173263	0.021488	0.541604	0.37	0.06	0.15
PDS5	-0.916825	-0.440228	0.750119	0.00173408	0.00291163	0.148151	-0.32	-0.33	-0.38
GLG1	0.968315	-1.08794	-1.24768	0.00173498	0.13665	0.201637		-0.33	-0.07
PFY1	0.934562	-0.439187	0.300982	0.00173498	1.49935e-06	0.00339078	0.87	0.59	0.56
PER33	-1.25404	-0.353837	-0.942551	0.00173498	3.14677e-06	4.08858e-09	-0.33	-0.64	-0.28
ERP5	0.788848	-0.106049	0.0225543	0.0017408	0.0431998	0.0315797	0.125	0.56	0.44
CRF1	0.809747	1.18198	0.967742	0.00174293	0.150022	0.687086		-1.96	-1.57
VPS17	0.68888	-0.0920846	-0.381354	0.0017588	0.0302923	0.0010533	-0.82	-0.12	-0.05
VTS1	-0.958294	1.15519	0.77174	0.00177934	0.0220639	0.521857	-0.6	-0.69	-0.53
SWP82	-0.871776	0.195496	-0.000704207	0.0017927	0.727196	0.555003	0.13	0.47	0.5
AIM31	0.984079	-0.10455	0.288497	0.0017927	0.000468658	1.31252e-07	0.235	0.38	0.38
GLT1	0.747228	0.815025	0.411173	0.0017992	0.41051	0.0226616	0.185	0.48	-0.19
GCN2	-0.769899	-0.228283	-0.222626	0.00181798	0.105063	0.158099	-0.36	-0.21	-0.21
RTS3	-0.745651	-0.391158	-0.332659	0.00182059	0.567769	0.823013	-2.23	-2.08	-1.95
SOL3	-0.673261	-1.52515	-2.12162	0.00182646	0.978734	0.0770493	1.415	1.27	1.11
MPP6	-0.718429	0.460654	0.487651	0.00182686	0.0390012	0.0826008		-0.03	0.02
GSP2	0.720357	-0.228492	-1.73175	0.00184707	2.12664e-27	0.119617	-0.665	-0.44	-0.4
YLR271W	0.944798	0.468809	0.249569	0.00185392	0.461719	0.594309	0.1	0.04	-0.1
MED1	-1.14965	0.375758	0.0344038	0.00185392	0.00663899	0.0119233	0.1	0.34	0.41
ERS1	0.878706	-0.716076	-0.469561	0.00185797	0.417134	0.652626	0.24	0.45	0.58
VRP1	0.814557	0.547533	0.817989	0.00187936	0.408398	0.092058	-0.415	-1.1	-0.7
CBF1	0.747424	0.551197	0.335417	0.00189331	0.0123504	0.511517		0.25	-0.17
YML090W	-3.08051	-4.25481	-3.52206	0.00189737	0.997486	0.594583	-0.065	-0.67	-0.53
OCA6	-2.6312	-0.75052	-0.156014	0.00192271	0.648414	0.454871	-1.52	0.24	0.43
PSD1	0.73393	0.105113	0.272121	0.00192429	0.524024	0.806817	0.96	0.41	0.7
VPS45	0.74825	0.970978	0.994374	0.00195101	0.0230303	0.417076	0.03	0.07	0.19
SPN1	0.766535	0.745483	0.613295	0.00196519	0.00739318	0.0070819	0.23	0.26	0.17
YIR007W	0.902239	-0.019088	0.0129473	0.00196875	2.75474e-45	4.6047e-17	-0.63	-0.3	-0.16
YOL086W-A	0.896316	-0.247242	0.843742	0.00198831	0.980227	0.857021		0.28	0.21
IRC15	0.762215	-0.0198326	0.138617	0.00198831	0.865077	0.249894		-1.91	-1.55
YBR116C	1.78028	0.114929	-1.15045	0.00198849	0.000166245	0.0313391	-2.62	-4.06	-2.07
NUP133	-0.776506	-0.0335118	-0.492467	0.001991	0.00012813	1.85664e-05		0.05	-0.13
BSC6	-0.764281	0.444648	0.40742	0.00199255	0.256938	0.848723	0.14	0.05	0.04
PHB2	0.72193	0.0414417	0.122851	0.00200014	0.00463545	0.0333321	0.12	0.4	0.34
VPS41	-0.801811	-0.490364	-0.175632	0.00202099	2.74409e-12	3.92111e-11	-0.28	0.03	-0.18
IMD2	-1.33162	-0.574041	0.484367	0.00202213	8.86719e-08	0.340341	3.185	1.09	1.09
YMR31	0.692823	-0.741382	-0.848557	0.00202638	0.000905859	0.00208664	0.99	0.92	0.79
CDC48	0.749907	-0.13238	-0.532617	0.00203914	0.899782	0.639021	-1	-0.52	-0.44
YPL107W	0.771515	0.746818	0.479517	0.00203966	0.000198478	0.00311807	-0.205	-0.44	-0.47
YDR341C	-0.874438	-0.653681	-0.860926	0.00203973	0.63687	0.997369	-0.475	-0.11	-0.04
GPI19	0.87421	1.0308	0.522167	0.00204564	1.48057e-06	8.4553e-06		0.04	-0.13
TIP41	0.784222	1.22599	0.889036	0.00204882	0.982427	0.868226	0.06	-0.2	-0.13
LYS9	0.913582	-0.103852	0.796906	0.00205061	0.328485	0.804104	-0.355	0.41	0.5
GDE1	0.663871	0.563903	0.403818	0.00205112	0.00191382	0.78746	-0.375	-0.34	-0.24
BIO2	-0.888424	-0.773706	-0.464723	0.00205393	0.000391291	1.89978e-06	0.075	0.75	0.54
BUD6	0.696218	0.346802	0.427607	0.00205802	0.000384616	0.0248259	-0.44	0.05	-0.11
EST2	-1.06396	0.736651	0.146656	0.00205875	0.000344288	0.00023004		0.04	-0.01
AIM17	0.93058	-3.36911	-2.70062	0.00205918	0.00207685	0.0657482	-0.345	-0.17	-0.01
TRP2	-0.792427	-0.32065	0.110412	0.00206476	0.975192	0.825535	0.02	0.6	0.35
YMR074C	0.794702	-0.414739	0.142429	0.00206717	0.0894738	0.00494533	0.97	0.98	0.81
ECM18	1.13263	0.483451	0.43211	0.00206741	0.00407472	0.00283884		0.29	0.34
YDR109C	0.721768	0.721356	0.12172	0.00207019	0.0766352	0.308402	-0.1	0.09	-0.05
AIM45	0.827741	0.0729376	-0.185123	0.00209361	0.519124	0.0391663	0.67	0.34	0.34
RRP15	-0.839524	0.820379	1.26081	0.00213178	0.724569	0.984879	0.09	-0.22	-0.22
TRM13	-0.799471	0.203278	-0.0761507	0.00213616	2.90758e-07	0.000232643		0.63	0.19
FLO10	0.963294	0.647471	0.631369	0.00214424	0.867451	0.184048		-1.05	-0.7
BRE5	-0.792343	-0.839468	-0.752476	0.00214903	3.69492e-05	0.0196427	-0.19	-0.13	-0.24
DFG10	-3.39963	-0.130779	0.582725	0.00215244	0.47005	1	1.19	0.4	0.62
YMR221C	-0.73312	-0.440391	-0.434974	0.00216343	0.813872	0.52317	-0.58	-1.21	-1.16
AIR1	-1.48499	0.84772	-0.362902	0.00216475	0.00087666	0.168571	-0.675	-0.58	-0.8
ORC6	0.796253	0.911865	0.764529	0.00217805	0.49293	0.528369	-0.285	0.33	0.27
TMA16	-0.778283	0.521804	0.603953	0.00217805	0.180025	0.280124		0.01	-0.17
APC1	0.672259	0.383645	0.174686	0.00221048	2.53749e-12	1.47478e-17	-0.395	-0.45	-0.31
MPT5	-0.92165	0.308609	-0.088109	0.00221402	0.0471006	0.047856	-0.38	-1.41	-1.01
RIM15	0.667284	-0.0178086	-0.246453	0.0022487	0.386213	2.51596e-10	-2.06	-0.77	-0.55
YJR038C	2.17522	0.680398	0.243209	0.00225757	0.171611	0.603451
PDR10	0.702845	0.933681	0.0724238	0.00225927	0.284239	0.9247	-0.89	-1.35	-1.16
UTR2	-0.706345	0.280169	-0.213012	0.00226292	0.0318703	0.205092	2.385	1.28	1.05
CKB1	0.708635	0.545588	0.663123	0.00226564	0.020224	0.000933324	0	0.21	0.29
YOL087C	0.642432	-0.897626	-1.13806	0.00226674	0.0203356	0.240491	-0.84	-0.56	-0.53
KKQ8	0.722315	-0.413022	-0.375689	0.00227326	8.91773e-05	0.0017514	-0.98	-0.32	-0.31
SEC17	0.681718	-0.271344	-0.154916	0.00227326	0.348451	0.910196	-0.315	-0.5	-0.29
YPT35	1.27571	0.767609	-0.282211	0.00227326	0.735376	0.356601		-0.06	-0.09
DGR2	0.757004	0.0382853	0.143393	0.00230258	9.67817e-06	7.57204e-05	0.26	0.04	0.09
ATG13	0.761418	0.169939	0.785264	0.00230527	0.00357723	0.0274372	-0.475	-0.4	-0.43
ECM21	0.728293	-0.250971	-0.206323	0.00230881	0.956218	1	-0.555	-0.55	-0.41
RPL19A	-0.746658	-0.831077	-1.27567	0.00230907	0.59991	1	-0.425	-0.16	-0.13
LAP2	0.705074	-0.682689	-1.31602	0.00232394	0.433386	0.0124216	0.835	0.2	0.17
RPS28B	-1.05076	-1.70506	-2.67135	0.00233653	0.982174	0.740513	0.84	0.38	0.11
HEM1	-0.767199	-0.161455	-0.868453	0.00234017	0.955391	0.122806	0.23	-0.03	-0.12
BDF2	-0.768586	-0.403442	-0.488878	0.00234391	0.930743	0.0792646	-0.11	-0.14	-0.1
NKP2	0.906478	0.372884	-0.0678993	0.00239001	0.0639184	0.139818	0.49	0.35	0.33
RFX1	0.935788	0.322049	0.287182	0.00239648	0.904224	0.73076		-0.22	-0.12
CBP6	-1.80822	-0.0945079	0.414528	0.00239663	0.0608274	0.629821		0.12	0.03
TED1	0.725512	0.546902	0.534002	0.0023978	0.111401	0.273139	0.11	0.65	0.62
TIF6	-0.818153	-0.511467	-0.608154	0.002431	0.00281274	0.00285712	0.29	-0.41	-0.24
SUI1	-0.732743	-0.808198	-0.586873	0.00244155	0.676865	0.0572803	0.275	0.14	0.38
ALK2	-0.876367	-0.218012	-0.0248495	0.00244155	0.0030574	0.0596552	-0.065	0	-0.07
OXR1	0.824083	-0.39422	-0.443911	0.00244437	0.0092805	0.00191068	0.13	0.34	0.27
KGD2	0.707213	-0.464292	-1.13368	0.00245663	9.86967e-05	0.181695	-0.295	0.42	0.31
RTS1	-0.821641	-0.313613	-0.361596	0.00245663	1.64086e-06	0.00105689	-0.42	-0.15	-0.23
DCC1	0.855396	0.810706	0.299242	0.00246067	0.817165	0.0156204		0.31	0.24
CPR8	0.700254	0.556158	-0.026162	0.00246067	0.0103101	0.149428	0.46	0.46	0.35
MET18	-1.04981	0.109096	-0.267718	0.00246067	0.00380954	0.168853	0.52	0.23	0.26
TLG2	0.728569	0.646682	0.600312	0.00247605	0.165043	0.11302	-0.095	0.43	0.27
PHM7	0.970251	-4.28961	-5.05409	0.00247757	0.00602627	0.732882	-1.34	-2.53	-1.43
ABZ1	0.664931	0.220597	0.284535	0.0024927	1.34396e-20	1.94381e-12	-0.535	0.15	0.11
CRG1	-1.3811	0.218269	1.20744	0.0024967	0.197773	0.737942	-0.22	-0.34	-0.27
RER1	-1.22539	0.392844	0.965456	0.00255744	0.108877	0.683927	0.68	0.57	0.52
STL1	1.17498	0.445921	0.371056	0.00255744	0.274729	0.437613		-1.47
VID30	0.798998	-0.328364	-0.366964	0.00255744	0.00257716	0.758439	-0.79	-0.63	-0.52	NCR
PKP1	0.695359	0.372103	0.281963	0.00255978	0.849317	0.608566	0.175	0.29	0.39
CRN1	0.665471	0.079366	-0.180565	0.00256746	0.000371728	1.10687e-06	-0.455	0.01	-0.11
THI73	1.06668	0.514135	0.83614	0.00256887	0.455664	0.893095		-1.33	-0.96
SPC19	0.966268	0.292544	0.493628	0.00259485	0.518303	0.185489	0.91	0.69	0.64
CDC5	-0.783003	-0.608228	-0.798787	0.00259761	0.0560972	0.0696967	0.645	0.76	0.61
SKT5	-0.679367	0.0545998	-0.0287968	0.00259761	0.00238927	0.0163868	0.135	-0.22	-0.26
AIP1	0.765862	-0.63759	-0.781688	0.00259761	1	0.435765	0.34	0.72	0.54
DNM1	0.754913	0.404493	0.321648	0.00260117	0.0846323	0.122981	0.12	0.53	0.39
NTF2	-1.65667	-1.21931	-1.18737	0.00261363	0.0325682	0.596814	1.155	0.42	0.43
TFG2	0.700423	0.429058	0.405227	0.00261363	0.000122227	0.00786947	-0.21	-0.11	0.04
PRE6	0.630837	-0.252088	-0.0388234	0.00263616	0.0175877	0.0112201	0.1	0.22	0.12
TPO5	-0.782056	-0.349591	-0.970246	0.00266024	0.104773	0.561441	-0.625	-0.43	-0.66
LSM12	-0.916307	-0.0829501	-0.143118	0.00267146	0.379009	0.87655	0.925	0.43	0.37
COX20	0.887706	-0.256352	-0.258371	0.00267192	0.94993	0.39123	-0.57	-0.11	-0.2
NIF3	0.646865	0.310345	0.0198659	0.00268299	0.679713	1	0.375	0.69	0.59
TFC8	-1.04382	0.179405	0.558442	0.00268403	8.68133e-05	0.850362	0.52	0.7	0.45
YLR063W	-1.24866	0.935318	0.482923	0.00269331	0.306733	0.51172		-0.82	-0.87
PEX21	-0.826728	1.14634	1.57466	0.00272527	0.0243011	0.0116932	-0.49	-0.21	-0.38
HFD1	0.684196	-0.537939	-0.366738	0.00272527	6.30068e-05	3.65093e-06	-0.8	-0.26	-0.13
HSC82	-0.828286	-1.15487	-1.80345	0.00272527	0.121386	0.263539	-1.03	-0.03	-0.49
RPL11B	-0.691204	-0.450689	-0.287493	0.0027272	0.288267	0.627179	0.16	0.31	0.06
SRP72	-0.804551	0.103494	0.0214664	0.00273967	0.0539598	0.627365	0.37	0.62	0.61
YGR251W	-0.753461	0.610313	0.781274	0.00275616	0.985262	0.72844	-0.435	0.29	0.12
RPS1B	-0.824356	-0.565248	-0.711178	0.00275616	0.6084	0.00636878	-0.045	0.22	0
YLR031W	-2.92814	-1.90085	-2.33565	0.00275978	0.345285	0.551811		-1.94	-2.05
FRS1	-0.68907	-0.654451	-1.14825	0.00279095	0.422441	0.103022	-0.155	0.51	0.52
YLR126C	-0.94731	-0.712358	-0.149974	0.00279352	0.0015946	3.47818e-06	-0.715	-0.82	-1.01
RPL24A	-0.841702	-1.07403	-1.25012	0.00281878	0.329569	0.759939	0.355	0.39	0.41
YNL022C	-0.654563	0.971102	0.795874	0.00283593	0.00219544	3.42017e-08	-0.19	0.6	0.43
SFT2	0.632457	-0.126281	0.488288	0.00286202	1.83336e-07	1.07242e-17	0.275	0.31	0.12
MAE1	-0.843423	0.570842	0.246484	0.00287494	0.617723	0.00413123	-0.84	-1.44	-0.67
SCW10	0.701789	1.79699	1.69253	0.00288382	0.190327	0.113648	0.79	0.14	-0.03
YLR072W	0.677262	0.57778	0.491803	0.00289068	0.261983	0.951598	-0.355	0	0.18
YCS4	-0.735282	0.204117	0.494449	0.0029148	0.345777	0.475282	-0.25	0.11	-0.06
SKN1	0.831698	0.640891	0.366355	0.00294198	0.823071	0.209014	0.22	-0.46	-0.15
DSE3	-0.643565	-0.400302	-0.0549106	0.00295099	0.0179619	0.0298557	0.695	0.16	0.78
HBS1	0.687983	0.433621	0.303565	0.00295272	0.092929	0.0745999		0.41	0.23
TRK2	0.708308	0.627586	0.197955	0.00295272	0.0015589	0.0450893		-1.01	-0.55
IDS2	0.624902	0.587518	0.705161	0.00299204	0.554793	0.999255	-0.18	-0.16	0.01
ADE17	-0.799446	-3.4634	-4.28344	0.00299678	0.2168	0.205463	-0.285	-0.54	-0.37
VBA4	-0.676393	-0.941808	-1.86804	0.00302316	0.0929046	1.30034e-05	0.07	-0.63	-0.53
YGL039W	0.967257	-0.640642	0.517131	0.00302502	0.252491	0.236214	0.89	0.94	0.41
DUN1	-0.798816	-0.586765	-0.370338	0.00307081	0.00164052	0.380926	0.335	-0.08	-0.04
TSR3	0.657561	1.06551	0.80919	0.00308002	0.0331541	0.975365	0.275	0.49	0.36
COX7	-2.35498	0.550613	2.02689	0.00308776	0.745638	0.554582	1.025	0.75	0.58
MPC54	1.14256	1.65472	1.20471	0.00314548	0.0121356	0.0322582		0.59	0.24
MCM4	0.669704	0.442258	0.729055	0.00315929	6.3095e-31	1.06749e-35	0.15	0.38	0.24
YPR014C	1.21306	0.647368	0.429285	0.00317625	0.000386618	8.07464e-11	0.33
SDO1	-0.803783	0.822463	0.349792	0.00318154	0.412048	0.331205	0.74	-0.13	-0.11
ARP3	0.710935	-0.398792	-1.03737	0.0031851	0.711581	6.96553e-05	0.005	0.3	0.31
SCP160	-0.768512	-0.667529	-1.08566	0.00318879	0.119783	0.000528567	-0.22	-0.12	-0.14
YJL169W	-3.49945	-1.13702	-0.217689	0.00319245	0.338274	0.554522		1.23	0.76
STB3	0.683155	0.0604655	0.235948	0.00320743	0.0841207	1	-0.82	-0.9	-0.72
TIM23	-0.812448	-1.13965	-1.4022	0.00324519	0.334164	0.321092	-0.26	-0.21	0.02
SMF1	0.634319	-0.0706412	-0.416619	0.00325173	0.116238	0.346263		-0.47	-0.23
GAL11	0.709156	0.743108	1.00255	0.003273	0.795664	0.564241	-0.83	-0.93	-0.78
RSM28	0.753183	0.93099	0.770876	0.00327501	0.247633	0.0488852	-0.135	0.05	0.19
SEN54	0.703008	0.372259	-0.25983	0.00328079	0.442763	0.171954	6.93889e-18	0.22	0.34
RRI1	0.94689	0.284896	0.510903	0.0032963	0.0186111	0.0024913	-0.045	0.04	0.17
ASG1	-0.747539	0.275854	-0.418326	0.00330298	0.862194	0.958516	-0.355	-0.21	-0.15
YPK2	0.835465	-1.35623	-1.6013	0.00330995	0.00947616	0.00637158		0.18	0.05
YNL179C	-1.9058	-1.16146	-1.73925	0.00331747	0.141164	0.330215		-0.15	-0.17
COX9	0.987943	0.206426	1.08808	0.00332789	4.33342e-05	0.000111654	0.57	0.17	0.17
QCR8	0.824287	-0.72818	-0.480581	0.00336003	0.115491	0.162663	0.76	0.58	0.52
YOL029C	-0.913292	-0.627736	-0.0230089	0.00336986	0.352432	0.938292	0.175	0.06	-0.04
YLR132C	0.824739	0.23471	0.680842	0.00338999	0.20713	0.000461421	0.62	0.69	0.59
IML2	0.658189	-0.337684	-0.393974	0.00339085	0.892314	0.735303	-0.1	-0.42	-0.15
STE11	0.683121	0.763068	0.954029	0.0034108	0.429618	0.535156	-0.455	-0.2	-0.21
TRL1	-0.774392	0.589285	0.407318	0.0034108	0.238792	0.969689		-0.01	-0.18
SRS2	-0.649416	-0.453603	-0.519753	0.00342425	0.579956	0.0644707	0.02	0.18	0.06
TSA1	0.706535	-0.592437	-0.776423	0.00343368	0.00831608	0.207269	0.275	0.2	0.18
CMD1	-0.779537	-0.37149	0.0650556	0.00348278	3.10846e-07	2.82166e-10	0.3	-0.14	0
AVT1	0.720856	-0.353713	-0.368059	0.00349433	0.0269984	0.367653	-0.265	-0.58	-0.58
LEU4	-0.733223	-1.13082	-0.0296869	0.00349867	9.2831e-06	1.12446e-09	0.825	0.64	0.61
LAC1	-0.706127	-0.380706	-0.618392	0.0035002	0.073582	0.348956	-0.045	-0.73	-0.33
PGD1	0.640539	0.758815	0.820536	0.0035002	0.727196	0.956152	-0.53	-0.3	-0.23
YKU70	-1.57695	0.305433	0.99659	0.00356218	0.00605193	0.000996843	-0.07	-0.38	-0.24
CLP1	0.736009	0.452192	0.114163	0.00358648	0.0409374	0.0145143	-0.705	0.13	0.24
TIF5	-0.768152	-0.444202	-0.934211	0.00358648	0.12207	0.0202257	-0.46	0.09	0.08
GLO4	1.37888	0.77269	0.070207	0.00361839	0.0102769	1.66717e-05	-0.04	-0.22	-0.33
PRP18	0.869643	0.776846	0.705097	0.00364229	0.0152589	0.727247		0.19	0.11
YPC1	0.841498	-1.60815	-1.36116	0.00365933	0.00058443	0.000140071	0.505	-0.2	0.37
YIL029C	-1.90627	-0.0779026	-0.178767	0.00366464	1.65595e-06	0.000488501		0.39	0.38
YBR013C	-5.4657	-0.297294	-0.0681594	0.00366648	0.665415	0.0455605	0.81	0.3	-0.04
NOP9	-0.697647	0.942503	0.5733	0.00368104	0.0349656	0.494892	-0.14	0.14	0.16
RPL39	-2.13012	0.401282	-0.586723	0.00368104	1.0824e-14	4.99871e-12	0.885	0.4	0.37
CWC23	0.934521	0.942996	0.751032	0.00368993	0.0125042	0.058648		0.23	0.16
RGS2	-1.00815	-0.0972685	-0.0180947	0.00370753	0.516266	0.0535993	-1.77	-2.1	-1.45
DGA1	0.665541	0.265792	0.0935904	0.00370828	0.0276079	0.254464	-0.355	-0.41	-0.4
HAL1	1.05026	0.0893147	0.372347	0.00371056	0.0980206	0.891628		-0.55	-0.2
DLD2	-0.721596	-0.09438	-0.04565	0.00371555	0.0766352	0.308402	0.105	0.46	0.43
RRN6	-0.65759	0.653434	0.250848	0.0037327	0.00859613	0.571267	-0.405	-0.1	-0.2
BNA2	-0.965395	-0.255033	-0.893259	0.00376207	0.00655757	0.00280672		-1.53	-0.92
OSH7	0.703508	-0.12515	-0.515797	0.00382112	8.92503e-32	4.28791e-41	-0.005	0.36	0.3
LAT1	0.75171	-0.777516	-0.7672	0.00384107	0.000153655	2.60112e-13	-0.075	0.2	0.24
NTH1	0.695352	-1.10816	-1.83023	0.00384193	0.0861907	0.229121	-1.56	-0.84	-0.56
SCS7	-0.697896	-1.60404	-1.60495	0.0038768	0.0533896	0.228892	-0.2	-0.58	-0.37
GAL80	0.639967	0.644644	0.258058	0.00392666	3.83251e-07	0.000749605	1.415	0.39	0.68
DPH5	-0.624097	-0.406633	-0.449857	0.0039338	0.481605	0.00464149	-0.275	0.13	-0.04
EAF6	-0.755451	0.0422605	0.041527	0.00393384	3.38399e-08	0.00143208	0.44	-0.16	-0.14
WSS1	0.894927	1.1366	1.45103	0.00393968	0.0768854	0.00439874		0.43	-0.02
GET2	0.691302	0.613309	0.374246	0.00393968	0.160508	0.502786	0.41	-0.01	0.05
MIF2	-0.6405	-0.627067	0.0193785	0.00395292	0.000261587	0.270721	0.24	0.35	0.07
CYC7	1.31081	-1.89222	-2.63935	0.00398929	0.127599	4.42414e-05		-0.28	0.22
BUB3	-0.736255	-0.301352	-0.200422	0.00398929	0.0100838	0.000634629	0.15	0.06	0.13
YML057C-A	0.91465	0.283664	-0.633995	0.00399058	0.186047	0.887001		0.29	0.37
CNA1	0.667916	0.458563	0.206187	0.00404136	0.865473	0.454552	-0.43	0.09	0.12
ZIP2	-2.59414	0.360692	0.655001	0.00405789	7.22588e-05	1.26564e-06		0.36	0.26
RSM24	0.633881	0.486149	0.71587	0.00408122	0.810134	0.184485	0.35	0.41	0.64
GDS1	-0.716317	0.178241	-0.173173	0.00409402	0.0033152	0.000108844	-1.155	-0.57	-0.47
SSQ1	0.697429	0.593769	0.732002	0.00413288	0.00079449	0.00738054	0.03	-0.15	-0.13
GDI1	-0.757681	0.142727	0.580735	0.00414062	0.162274	0.403727	-0.785	-0.74	-0.64
GSH1	-0.731715	-1.36724	-2.34096	0.00415207	0.000258971	0.00216318	-0.2	-0.21	0
GEA2	-0.707937	-0.33744	-0.364883	0.0041813	0.50801	0.220118	-0.1	0.13	0.01
RPL22A	-0.901061	-0.995334	-1.63019	0.00418851	0.289908	0.180859	0.225	-0.05	-0.12
GUD1	1.1087	-0.583222	-0.707639	0.00418851	0.00016964	1.52806e-05	-1.115	-0.5	-0.81
NAS6	0.803367	-0.810291	-0.190155	0.00419092	0.0322559	0.00590215	0.265	0.55	0.53
PAH1	0.607227	-0.0488817	-0.0953147	0.00420467	0.489251	3.28619e-05	-0.72	-0.51	-0.37
DOT5	0.809796	0.331038	-0.222574	0.00425933	0.0142221	0.152769	0.39	0.44	0.55
RPL6A	-0.770354	-0.543933	-0.422039	0.00426626	0.0776383	0.987717	-0.325	-0.36	-0.19
SSH1	-0.89552	-1.19584	-1.1112	0.00427202	0.482489	0.0535028	0.025	-0.18	-0.31
ZUO1	-0.660454	-0.415528	-0.827302	0.00428197	0.212156	0.203605	-0.21	0.35	0.16
ARL1	-0.662928	0.0413961	0.597847	0.00429784	0.00108212	0.00010079	1.04	0.84	0.66
COA1	0.721712	-0.0244743	-0.00818856	0.00430289	0.0155636	0.149862	0.745	1.18	1.19
PRM4	-0.853565	0.40876	0.249044	0.00431899	0.0446653	0.0441519	-0.43	-0.13	0.26
YJL055W	0.671773	-0.209766	-0.224094	0.00434542	0.0281844	0.0072707	0.155	0.53	0.33
YOR170W	-5.1575	-0.141007	1.55526	0.00443257	0.165074	0.88257
ASN1	0.848477	1.47711	2.06463	0.00446656	0.228264	0.246927	0.805	1.65	0.89
RTT106	-0.658048	-0.144055	0.155716	0.00451978	9.5717e-06	0.956152	-0.11	0.07	0.09
SHE10	0.775767	0.223399	-0.0844953	0.00457856	0.00324234	0.415356	-0.48	-0.17	-0.13
MTC4	0.630395	0.733722	0.601461	0.00460018	0.174278	0.0294389	-0.98	-0.44	-0.46
YPT6	-1.30451	0.391771	0.792901	0.00466254	0.00138246	0.000837062	0.18	0.85	0.77
CSM3	0.772827	0.841356	1.0576	0.0046919	0.497825	0.0229864	-0.31	-0.01	-0.03
YDR391C	0.933606	0.21918	0.489651	0.00473266	0.0775448	0.778131	-0.11	-0.33	-0.07
MRPL23	0.640777	0.126557	0.755502	0.00474071	0.155052	0.00889952	0.84	0.82	0.99
YDR089W	-0.681021	-1.62928	-1.66156	0.00474071	0.13522	0.93919	0.285	-0.42	-0.1
RPL33B	-0.841013	-0.721465	0.0549967	0.00474071	0.00439104	0.0425644	0.59	0.77	0.68
KDX1	-0.956919	-0.130691	-0.104599	0.00474654	1.07595e-06	0.000900323	-0.8	-1.14	-0.76
YMR122W-A	0.898316	-0.480426	-0.111025	0.0047658	0.811911	0.875618	1.39	-0.17	0.28
RPS21A	-0.749422	-0.960424	-0.920556	0.0047706	0.808893	0.838019	0.655	0.89	0.72
MRP10	0.661491	0.384089	0.653017	0.00479425	0.698934	1		0.67	0.8
PSR2	0.70119	0.353453	0.742222	0.0048315	1.14066e-05	0.0224715	-0.225	-0.12	0.03
MMT2	0.761985	-0.0128644	0.0782537	0.00484325	0.458226	0.556443	0.855	0.68	0.74
YMR279C	0.653598	-0.685693	-0.607915	0.0048514	0.000368515	0.0177128		-0.81	-0.99
YIM1	0.665073	-0.156946	-0.199813	0.00488276	0.881642	1	-0.185	0.07	0.16
RFS1	0.686876	-1.19148	-0.927664	0.00492262	0.306343	0.806372	-0.33	0.75	0.64
TEL1	-0.688325	-0.107611	-0.426624	0.00494367	0.963218	0.49969		-0.61	-0.49
SWM1	0.698115	1.02394	0.781612	0.00499062	0.782898	0.915835	0.04	0.59	0.45
PEX32	-0.952233	0.241062	0.363064	0.00501525	0.00237053	0.396654	0.4	-0.08	0.01
RAS2	0.731697	-0.667196	-1.28352	0.00502594	0.683753	0.0138161	0.3	0.56	0.41
ALG12	-0.613958	-0.390648	-0.824117	0.0050534	0.689402	0.0724222	0.03	-0.11	0.03
AFT1	-0.717385	-0.270434	0.0839509	0.00510702	0.0029443	0.00843656	0.07	0.09	0.07
KTI12	-0.797316	0.56419	0.429737	0.0051179	3.89827e-06	3.85955e-12	0.97	0.93	0.71
TGS1	-0.974663	0.290226	-0.0345243	0.00513652	4.16132e-11	6.40416e-10		-0.32	-0.28
YCP4	0.698044	-0.407432	-0.853869	0.00515537	0.00563664	0.368435	0.165	0.26	0.5
TFB3	0.713652	0.702216	1.01714	0.00520134	0.0893376	0.107771	-0.18	-0.12	-0.07
SPE3	-0.775456	-1.37608	-1.35565	0.00520948	0.889372	0.939058	-0.54	-0.02	-0.28
RIB4	0.655227	-0.142006	-0.163402	0.00529508	0.000216924	1.60118e-06	0.325	0.95	0.78
YOL150C	2.50087	-0.230356	0.727859	0.00529633	0.00838941	0.157027		-0.7	-0.04
JIP4	0.643031	-0.0715245	0.171143	0.00535989	0.00769525	0.977323	-0.53	-0.21	-0.225
RRP14	-0.679819	0.897453	1.10429	0.00539715	0.000270155	0.000111654	-0.055	-0.33	-0.21
SEF1	0.689214	0.13765	0.442006	0.00542337	0.292172	0.516171	0.185	0.18	0.15
ELO1	0.673882	-0.00857705	0.101184	0.00543497	0.324672	0.0712111	1.08	0.19	0.41
REH1	0.661246	1.10468	1.19005	0.00544767	0.0677539	0.5368	-0.24	-0.02	-0.17
RTG1	0.665009	1.01939	0.0713444	0.00545055	0.453901	0.286185	-0.18	-0.5	-0.33
VID28	0.626029	-0.25818	-0.142168	0.00545055	0.0431606	0.00384568	-0.83	-0.51	-0.44
CAB4	0.676601	0.283203	0.196945	0.00552169	0.580419	0.631619	0.19	0.44	0.26
VID24	0.661349	1.99073	1.9297	0.0055737	0.0301374	0.00636878	-0.37	-1.83	-0.59
MTQ1	0.867377	0.242704	0.092881	0.0055737	0.636657	0.0482806	0.2	0.09	0.33
MDM20	-0.905492	0.400274	0.206684	0.00557905	4.22808e-08	1.9123e-17	0.54	0.79	0.5
CMP2	0.639962	-0.0880335	-0.405865	0.00560256	0.811652	0.559689	0.07	0.02	0.04
URA2	-0.647243	-0.92476	-1.17272	0.00560256	0.212857	0.239429	0.06	-0.19	-0.21
PET494	0.642429	0.101576	0.352911	0.00561354	0.00343446	3.57926e-06	-0.3	-0.05	-0.05
POP3	-0.922113	0.132477	-0.620319	0.00561931	0.243822	0.226651	-0.9	-1.02	-1.03
ATG29	1.05598	-0.228703	-1.54397	0.00567367	0.0137533	0.637124		-0.62	-0.62
SSB2	-0.646374	-0.761873	-0.740868	0.00568707	0.865336	0.802093	-0.24	-0.28	-0.13
SKI2	0.604757	0.442986	0.631826	0.00568707	0.230586	0.571964	-0.35	-0.15	-0.08
GAL3	1.11576	0.801222	0.0267258	0.00569742	0.0591667	0.186655		0.39	0.3
YOR378W	0.738946	1.45155	1.15787	0.00572164	0.000200148	0.00117791		-0.23	-0.24
YDL109C	0.783939	1.11978	0.744972	0.00574613	0.125062	0.00442539	-0.63	-0.23	-0.31
ERG20	0.638549	0.253072	0.0685962	0.00575991	0.884847	0.0131626	0.305	0.44	0.29
CRC1	-1.39617	-2.27228	-2.29813	0.00576694	0.938188	0.994527	-1.105	-0.78	-1.08
BIT2	0.75421	0.505299	0.456544	0.00578222	0.144996	0.459113	-0.61	-0.86	-0.52
FPK1	0.619377	-0.239338	-0.279311	0.00578581	0.46678	0.470318	-0.165	-0.28	-0.24
HUL5	0.753805	0.495926	0.60966	0.00582335	0.962217	0.0128293	0.21	0	-0.07
DNA2	0.63059	0.549839	0.651561	0.00590061	2.4863e-06	4.85705e-10	-0.22	-0.22	-0.13
PIC2	0.783649	-2.25806	-2.13684	0.00601123	0.575874	0.603814	0.97	0.23	0.9
LAP3	-0.630434	-1.46439	-1.72194	0.00602341	0.498004	0.838743	-1.175	-0.98	-0.97
MGR1	0.666675	0.648492	0.950336	0.00602941	0.001397	0.017338	-0.215	-0.4	-0.24
TCB1	0.622212	-0.781567	-0.819119	0.00604764	0.389807	0.0672445	-0.59	-0.48	-0.37
PBS2	0.605588	0.445102	0.632286	0.00608045	0.00233914	0.000198337	-0.51	-0.12	-0.23
SLZ1	-1.94167	-1.25707	-0.634374	0.00608212	0.632397	0.267616
ERG2	0.980498	0.376777	1.27238	0.00608212	0.78822	0.00605391	0.835	-0.2	-0.27
HAP2	0.665106	-0.171753	-0.0504369	0.00610567	2.30932e-10	3.87057e-09	-0.075	-0.03	0.08
PKC1	0.670662	0.350043	0.479856	0.00610567	0.00404151	0.89855	-0.54	-0.17	-0.34
CCT8	-0.618788	-0.0740842	-0.605678	0.00611531	0.29127	0.870164	0.25	0.67	0.53
FKH2	-0.902764	-0.546354	-0.688276	0.00612179	0.777534	0.869152	-1.125	-0.22	-0.28
YHR045W	-0.925326	-0.17233	-0.351757	0.00612692	0.139524	0.841672	-0.07	0.08	-0.08
STE24	-0.852714	-0.720441	-1.05186	0.00614835	8.34218e-05	0.00186677	0.315	-0.47	-0.22
RET3	-0.820996	-0.485855	0.110894	0.00616087	0.137425	0.00972328	-0.195	0.58	0.59
YBR016W	0.684556	-0.0475793	0.556204	0.00617381	0.19334	0.00523516	0.035	0.47	0.73
AIM1	1.01496	0.113444	1.52721	0.00620402	1	0.870184	1.015	1.09	0.86
HPF1	0.737726	-0.582787	-0.855137	0.00620777	0.0109895	0.0428425	1.9	-1.61	-0.01
YFR045W	0.999509	0.165207	0.0120158	0.00623445	0.664275	0.584814	0.305	-0.47	0.03
THI2	0.89122	0.778484	0.955451	0.00629672	1.70049e-07	0.00136031		-0.15	-0.22
PAI3	1.01341	0.239532	-0.769437	0.00629672	0.721076	0.125752	-2.22	-1.91	-1.42
CAJ1	0.734432	-0.0146188	0.0266866	0.0063016	1.34821e-05	0.00417194	-0.115	0.22	0.15
MDM31	0.684221	-0.886446	-0.920547	0.00633872	0.534054	0.28908	0.315	-0.15	-0.03
PYC1	-0.697309	-2.27736	-2.07787	0.0063564	0.0123111	4.60621e-07	-0.165	0.46	-0.08
ICL2	0.831995	-0.242618	0.0834029	0.00644776	0.113228	0.00348999	0.77	1.01	0.66
RPL5	-0.684267	-0.744007	-1.2196	0.00647327	0.41051	0.834233	-0.6	-0.14	-0.11
VTA1	0.643375	0.217719	0.423189	0.00648978	0.0240829	0.13298	-0.185	-0.3	-0.36
TRM5	-0.866771	0.710165	0.305521	0.00652042	0.408513	0.996227	-0.36	0.44	0.23
YJL144W	0.886925	-0.382102	-0.967653	0.00656519	0.13584	0.00442539		-1.51	-1.28
RPS27B	-0.759498	-0.816771	-0.0375702	0.00660469	0.00412363	0.000337422	0.48	-0.16	0.06
SGF11	0.677581	1.39523	2.08408	0.00664423	1.24478e-08	4.39983e-07	0.06	-0.45	-0.41
SSK1	0.692864	-0.549369	-0.264155	0.00670123	0.637943	0.614796		-0.45	-0.28
LIP2	0.769841	0.831534	1.12037	0.00673653	0.464666	0.649495	0.025	0.09	0.19
ARF1	-0.685648	-0.531031	0.242334	0.00675023	0.810894	0.575677	0.605	0.87	0.52
MAG2	0.602597	0.62401	0.637414	0.00677929	0.000237526	2.53352e-05	-0.34	0.14	0.09
PEX10	0.636988	0.300356	0.404922	0.00682141	0.147209	0.000159544	-0.24	-0.05	-0.02
GND1	-0.709705	-2.20596	-2.195	0.00685221	0.70702	0.136863	1.075	1.32	1.06
YOL159C	-1.28794	-0.772385	0.282462	0.00685221	0.943198	0.828518		0.51	0.34
QDR3	0.603095	2.35644	2.30482	0.00685414	2.90758e-07	3.16909e-07	-1.105	-1.19	-1.08
FYV10	-0.966488	-0.565375	-0.623097	0.00685414	5.36286e-07	0.865167	-0.65	-0.48	-0.45
CDC33	-0.637685	-0.379056	-0.579118	0.00688023	0.335389	0.718429	0.435	0.25	0.15
CLB1	-0.779469	-0.383045	-0.142468	0.00688023	0.265598	0.539476	0.265	0.2	0.54
RRT8	0.7057	-1.14871	-1.65461	0.00688935	2.25807e-15	1.54978e-14	0.18	-0.17	0.01
CHS7	-0.620784	-0.212107	0.509309	0.00695094	0.558744	0.908295	-0.625	-0.53	-0.51
ECM13	-0.67407	0.335731	1.44403	0.00695094	0.201467	0.617341	-1.61	-0.82	-0.83
SPP381	0.773351	1.15163	0.756283	0.00696493	0.809081	0.145305		0.22	-0.17
PDE2	-1.19327	0.527878	0.0288343	0.00701975	0.000336912	9.56935e-06	0.33	-0.54	-0.44
AAC3	-1.91701	-1.15384	-1.08721	0.00703601	0.74239	0.21546	0.63	0.76	0.72
NYV1	0.585755	0.106218	-0.0746273	0.00704821	0.427962	0.954091	-0.075	-0.11	0.07
IRC24	0.643099	-0.312914	-0.938744	0.00705746	0.640383	0.127843	-0.6	0.18	0.24
NFI1	0.69605	0.880999	0.947214	0.00708847	0.506268	0.000186686	0.23	-0.31	-0.24
OST5	-3.79587	-2.62899	-0.412781	0.00709043	0.00292291	0.00888126	0.93	1.23	1.09
YGL152C	2.31846	-0.475393	1.24149	0.00712117	0.0515019	0.00890153	0.04	-0.09	-0.12
PIN2	-0.657485	-0.5983	-0.46795	0.00713326	0.124747	1	0.19	0.17	-0.08
DCS1	0.693861	-0.561144	-0.869914	0.00714776	1.70532e-11	0.000111049	-1	-0.29	0.03
CHO1	0.707709	0.0698872	0.48479	0.00714776	2.21201e-05	0.0192977	0.25	-0.03	-0.14
HXT8	0.986055	1.20714	1.24462	0.00726123	0.354193	0.862072		-0.44	-0.21
ECM15	0.816731	-0.78881	-0.248259	0.00729774	2.21145e-06	4.1524e-06	0.885	0.92	0.71
COX15	0.66972	-0.930165	-0.898383	0.00729791	0.0762613	0.162795	0.81	0.22	0.37
RPL21A	-0.724272	-0.796031	-1.3936	0.00735028	0.359719	0.3281	1.07	0.66	0.63
ELC1	0.840127	0.244022	0.676451	0.00735677	0.113963	0.0726174	0.73	0.12	0.13
YBR012C	-3.00683	-0.700619	-1.49037	0.00735979	0.0149584	0.00833547		0.06	0.04
ROG3	0.878638	0.275725	0.18184	0.00739082	4.16719e-12	3.84251e-11	0.835	-0.53	-0.26
NCA3	0.911427	1.64642	0.845006	0.00739803	2.31237e-10	7.93302e-12	-2.395	-3.82	-2.8
COG2	-1.31729	-0.0720896	0.626344	0.007399	0.00470492	8.69974e-05	0.87	1.09	1.23
MTF2	0.644846	0.459782	0.266594	0.00740356	0.0018971	0.00307281	0.62	0.57	0.59
RPL7A	-0.633325	-1.08707	-1.64372	0.00740587	0.0562736	0.00968235	-0.77	0.65	0.59
ALR2	0.71724	0.619333	0.300801	0.00744053	0.0292254	0.348765		-0.33	-0.15
SEM1	1.79903	0.898471	2.80559	0.00747061	0.452438	0.00356599	0.46	0.63	0.69
SFC1	0.864302	0.523189	0.0954412	0.00748312	0.668626	0.897301		-0.76	-0.89
STU1	-0.636717	0.0277911	0.291599	0.00748449	0.16352	0.0863187	0.195	0.17	0.2
YDL206W	-1.12872	-0.636657	-0.684511	0.00749253	0.835962	0.0232034	0.37	-0.72	-0.23
PEF1	0.635	1.09855	0.938673	0.00749496	0.180565	0.114299	-0.04	0.3	0.33
STE50	0.709826	0.476263	0.111224	0.00750157	0.51329	0.216134	-0.45	-0.38	-0.25
YPL277C	-0.922802	-0.168789	-1.18437	0.00754128	0.0191921	0.00102742	-0.55	-0.18	-0.03
PET9	0.742537	-0.768103	-1.16993	0.00756299	0.0698705	0.73882	0.115	1.09	0.51
RPL4B	-0.726124	-0.442767	0.0694946	0.00759069	0.924012	0.0407551	-0.13	0.29	0.23
CTP1	-0.732131	0.250719	0.0526073	0.00759664	0.74139	2.40816e-08	0.775	0.84	0.83
HSL1	-0.649035	-0.609033	-0.491008	0.00759664	0.0443041	0.0100991	-0.09	0.01	-0.09
PEX7	0.664572	0.430567	0.813136	0.00764411	0.804122	1	-0.11	-0.13	-0.01
YER010C	0.749555	0.50931	0.310153	0.0076637	0.0117084	0.00279762	0.94	0.71	0.59
RPT3	0.642995	0.294796	0.0202173	0.00766865	0.402332	0.0444396	-0.28	0.41	0.31
CBT1	1.271	0.588303	1.17896	0.00773113	0.978734	0.965562	0.59	0.62	0.32
TMT1	0.758773	0.177938	1.33362	0.00773113	0.00161439	0.00426212	0.4	0.46	0.22
SNO1	0.940825	0.142851	-0.423364	0.00775407	4.46536e-15	1.50474e-12	-0.83	-2.73	-1.6
SEC8	-0.858691	-0.0832616	-0.0259524	0.00775469	0.441322	0.899741	0.085	0.06	0.01
MDJ2	0.983239	0.796003	0.672257	0.00776885	0.00293852	2.21784e-05	0.6	0.03	0.09
POP6	-5.57829	-1.66508	0.703658	0.00778309	0.42946	0.123613		-0.45	-0.25
YLR164W	0.73455	-0.206778	-0.556661	0.00778783	0.0119854	0.404264	-2.755	-3.43	-3.08
UBC12	-0.954205	-1.29718	-1.16831	0.00782543	0.378516	0.0222781	0.32	0.25	0.18
REC107	0.714327	0.0139423	0.442611	0.00783824	0.00263613	0.946239	-0.16	0.09	0.26
YHR173C	-1.70278	-1.74744	0.138903	0.00783824	0.00352138	0.0732036		0.06	0.2
NCE102	0.667747	-2.11965	-2.11062	0.00783901	7.63733e-10	1.03529e-15	0.335	-0.34	0.16
YDL196W	0.956715	0.370863	-0.067787	0.00788799	0.250304	0.810499	0.08		0.2
NUP116	0.591961	0.35314	0.134522	0.0079043	0.0631174	0.439527	0.07	0.13	0.07
GIP4	0.601636	0.154259	0.0695629	0.00792363	0.000579804	0.000176815	-0.59	-0.49	-0.44
FUM1	0.60375	-0.425539	-0.622634	0.00794289	0.0392974	0.482085	0.225	0.18	0.15
UBP1	-0.600119	0.4244	0.229114	0.00800702	0.00362457	0.00819505	-0.1	-0.18	-0.21
IZH1	-0.848016	1.29001	1.67642	0.00802877	1.38106e-06	2.33709e-10	-0.03	-0.01	0.05
MCH5	-0.70501	-0.30196	-0.915381	0.00802877	0.25856	0.138717	0.385	-0.17	-0.08
CAP2	0.612615	0.030355	-0.099811	0.00804198	3.11046e-14	5.64684e-13	0.13	0.6	0.5
ASK1	0.658267	0.969745	1.14412	0.00804198	0.079885	0.666399	-0.3	-0.16	0.01
SRP54	-0.599353	-0.492761	-1.11642	0.00804736	2.50143e-24	6.06869e-22	-0.525	0.04	-0.29
ATP10	1.03726	0.00971062	-0.466247	0.00807418	0.15195	0.158555		-0.05	0.02
MSR1	0.677532	0.820165	0.714082	0.00822034	0.196887	0.0424032	-0.33	0.12	0.07
ERV1	0.850532	0.0961326	0.731394	0.0082221	0.24719	0.73882	0.42	0.95	0.75
MGR3	0.610156	0.0248598	0.134777	0.0082221	2.94883e-05	1.15289e-07	-0.28	-0.29	-0.14
AVT6	0.559694	-1.06241	-1.2833	0.008262	0.416646	0.0540666	-0.875	-0.81	-0.9
YGR235C	0.652595	0.437429	0.447866	0.00833677	0.198891	3.50757e-08	0.9	0.56	0.46
WRS1	-0.658857	-0.260024	-1.03217	0.00833677	4.70969e-07	0.0164084	0.245	0.67	0.46
GIN4	-0.62989	-0.547168	-0.557061	0.00833677	0.150404	0.944854	0.36	0.5	0.3
ASI3	-0.943372	0.0234124	0.180784	0.00833677	0.0344979	0.0912584	-0.12	0.13	0.01
FIP1	0.608082	0.261096	0.264982	0.00833677	0.698473	0.841816		-0.11	0.03
RIO2	-0.708507	0.718851	0.476055	0.00834164	0.328885	0.00404342	-0.48	0.2	0.03
DNF3	0.659311	0.147013	0.30589	0.00834256	0.000457044	0.000331801	-0.54	-0.48	-0.53
SNF5	0.663647	0.743208	1.01735	0.00836887	0.0772484	0.846197	-0.015	0.21	0.21
LUC7	0.814934	0.756227	0.532593	0.00836887	0.718701	0.0214717		-0.24	-0.21
TEA1	-0.583907	1.0772	0.994372	0.00837173	0.0224728	0.115382	-0.98	-0.67	-0.76
LST8	0.60267	0.38129	0.0248427	0.00837883	0.0291565	0.0103743	-0.44	0.12	0.03
VAC7	0.668569	0.691479	1.0477	0.00839341	0.907566	0.180419	-0.515	-0.49	-0.53
TCO89	0.605328	0.45046	0.334494	0.00841929	0.000262064	0.000319027		-0.2	-0.3
YDL027C	0.655033	0.118576	0.0516709	0.00848345	0.00286526	0.435422	0.025	-0.14	0.14
BUD16	-0.734725	-0.0331881	-0.353161	0.00849065	0.000355067	0.0014272	-0.225	-0.13	-0.19
PRC1	0.668678	-0.997494	-1.93545	0.00850316	0.00315392	1.16699e-06	-0.345	-0.23	-0.27
SEC59	-1.24908	-0.35	0.446034	0.0085701	0.549203	0.0527739	0.565	0.01	0.21
APS1	0.808803	0.726962	1.74452	0.00858555	0.515492	0.217517	0.42	0.61	0.28
YSW1	-1.08278	-1.01518	0.143328	0.00860368	0.484031	0.70241	-1.63	-1.18	-0.93
YLL058W	0.839417	0.54073	0.230036	0.00860368	2.67131e-06	0.0222203	0.655	0.74	0.61
ATG20	0.649018	-0.15436	-0.210097	0.00860368	0.9975	0.230352	-0.2	-0.02	-0.07
RSN1	-0.642786	0.283239	-0.297704	0.00861461	0.0790033	0.432218	-0.16	-0.15	-0.04
INM1	-0.783144	-0.214084	-0.511622	0.00866438	3.84225e-06	2.57825e-10	-0.39	-0.09	-0.11
CDC3	0.617431	0.367091	0.260655	0.00871187	0.0191366	0.380926		0.78	0.54
SPS18	-1.04859	-0.110091	-0.375399	0.00872415	0.257998	5.12008e-10		-0.21	-0.07
TYW3	0.863351	0.357126	1.25772	0.00874209	0.30163	0.863584	0.41	0.79	0.75
YCR101C	1.47748	0.000391369	0.453723	0.00874248	0.922212	0.284383		-1.06	-0.68
NMD4	-0.766043	-0.183728	-0.19325	0.00879726	0.0272889	0.0418456	-0.175	0.06	0.1
ADE12	-0.633029	-0.783105	-0.91747	0.0088197	3.74238e-07	6.07763e-05	0.83	0.23	0.65
TEN1	1.85725	0.439939	1.62569	0.00883957	0.102796	0.805806		0.02	0.06
UBP8	-1.01466	-0.124097	-0.664153	0.00883957	0.701179	0.000444537	-0.585	-0.63	-0.45
YBL081W	-0.736343	0.832759	0.629594	0.00886655	0.0138704	0.00013157	-0.535	-0.78	-0.46
XPT1	-0.741868	-0.508441	-0.358639	0.00893959	0.127589	0.853897	0.01	-0.14	-0.16
CTR86	-0.804923	0.49528	0.16359	0.00899935	0.17206	0.508346		0.22	0.2
TPD3	-0.713132	-0.533702	-0.243215	0.0091482	0.399898	0.901857	0.07	-0.06	0.08
NUP145	-0.669185	-0.092082	-0.201179	0.0091482	0.0216792	0.111237	0.205	-0.3	-0.22
ISM1	0.6471	0.289942	0.126129	0.00940076	0.0936036	0.00125777		0.3	0.27
YPR096C	-5.39862	1.86949	0.131286	0.00940076	0.0682308	0.370586
YPT31	0.607327	0.114886	-0.328462	0.009403	0.275625	0.972515	0.475	0.71	0.65
MTC2	0.696582	0.796042	0.888242	0.00942824	0.21183	0.00699711	0.04	0.57	0.6
SRT1	-5.38884	-1.46639	-0.374846	0.00943829	0.661815	5.82067e-06	0.15	-0.25	-0.52
PRE8	0.597131	0.101353	0.0817025	0.00943829	0.810431	0.316222	0.435	0.19	0.16
GRX4	0.642376	0.176508	0.956503	0.00951762	0.815776	1	-0.045	-0.04	-0.08
STV1	0.594397	-0.0184439	-0.0136378	0.00963711	0.0154837	0.0924791	0.775	0.18	0.18
YJL147C	-0.996273	0.929585	1.13851	0.00965193	0.280932	0.325767	0.14	0.39	0.24
RCK2	0.607158	-0.000230697	-0.108228	0.00969918	0.637011	0.153117	-0.315	-0.5	-0.43
YDL185C-A	-5.26072	-5.76198	-5.52879	0.00971931	0.000161671	0.00152198		-0.64	-0.56
YBL113C	1.16396	-0.142733	1.15331	0.00973123	1	0.188415	-1.07	-0.52	-0.6
KHA1	-0.613082	-0.367556	-0.242845	0.00982437	0.00936927	0.83087	0.34	-0.55	-0.4
YGL036W	0.693166	0.0579291	-0.0375922	0.00985224	2.22201e-12	1.46454e-10	-0.725	-0.96	-0.68
ETP1	0.609022	-0.278282	0.0361047	0.0098646	0.304127	0.90163	-0.79	-0.51	-0.38
RPS16B	-0.747903	-0.636048	-0.432617	0.00988046	0.134219	0.733157	0.44	0.14	0.28
DTR1	1.2069	0.95144	0.913231	0.00988312	0.593408	0.865919	-0.61	-1.44	-1.22
YMR034C	-0.879828	-0.285652	0.327777	0.00988604	0.079885	0.0150439	-0.59	-1.05	-0.88
RPL7B	-1.35942	0.85732	-0.83904	0.0099449	0.102359	0.474372		0.13	0.4
YLR101C	1.75587	0.699609	2.61709	0.00995209	1.60784e-10	7.97329e-13		0.62	0.43
YIH1	-0.626399	-0.416541	-0.344032	0.00998358	0.344948	0.00636878	0.86	1.4	1.08
MED8	0.7947	0.284034	0.268231	0.010049	0.94515	0.78149	-0.27	-0.07	0.08
APT1	-0.640407	-0.261721	0.542059	0.0101172	7.67797e-06	8.76873e-07	0.845	0.02	-0.02
SMK1	0.697779	0.265359	-0.189664	0.0101903	0.0415102	9.31499e-06		-0.95	-1.03
AAD10	0.828512	0.715686	0.509102	0.0102194	0.956218	0.477398	-1.18	-1.1	-1.08
HDA2	-0.761019	-0.515803	-0.380567	0.0102215	0.000497215	0.01161	-0.02	0.16	0.12
LOT6	0.835091	0.704723	0.633573	0.0102316	0.883433	0.0477834		-0.01	0.09
KTI11	-1.24559	0.626	0.219299	0.0102398	0.971071	0.70589		-0.44	-0.57
SEN15	-1.18829	-0.495123	-0.856798	0.010251	1.13746e-06	1.13209e-07	0.525	-0.01	0.02
IRC9	1.49038	-0.952655	1.1409	0.010251	0.0970297	0.121887	-0.74	-1.08	-0.7
ARI1	0.670562	1.17926	0.540906	0.010251	0.345938	0.000178107	0.61	0.5	0.69
MIA40	0.767413	-0.192387	-0.060509	0.010251	0.0471097	0.0395104	0.095	0.22	0.3
QNS1	0.574887	-0.17449	-0.281706	0.0102545	1	0.62664	-0.11	-0.27	-0.23
ADK2	0.723033	0.20539	0.820044	0.0102725	0.336684	0.387163	0.59	0.89	0.82
SVF1	-0.612838	-0.0111566	-0.0905721	0.0102805	0.00475483	0.0979506	-0.035	0.29	0.15
DYN2	0.845676	-0.0997336	0.996193	0.0104764	0.599049	0.304986	0.275	0.28	0.22
POT1	1.05225	1.53785	0.271106	0.0104764	0.00113923	0.000113476		-3.02	-1.84
AIF1	0.863889	0.889784	0.960927	0.0105358	0.0167579	0.139534		1.77	1.41
YAP1802	0.653627	-0.391536	-0.435548	0.0105413	2.86451e-06	0.000290986	-0.07	-0.27	-0.03
BIO3	0.932749	1.06341	1.3046	0.010554	0.139558	0.986397	-0.01	-0.06	-0.29
YNR063W	-0.878551	1.28546	0.536126	0.0105543	0.00143636	7.82538e-06		0.02	-0.01
MOT3	-0.65589	-1.00766	-0.581459	0.0105544	0.0681699	0.247982	-0.34	-0.06	0.1
RIB1	0.710237	0.929779	0.635694	0.0105544	0.742601	0.927694	0.195	0.15	0.22
MRPL8	0.590749	0.0654601	-0.166644	0.0105691	0.946987	0.247999	-0.1	0.46	0.3
RIB3	-0.596149	-0.632989	-0.302321	0.0105943	0.000332858	1.50474e-12	-0.025	0.13	-0.06
YML6	0.600132	0.295143	0.095057	0.0105943	0.545013	0.378124	-0.3	0.38	0.58
MSC2	-0.693502	0.543649	0.79711	0.0106727	0.0323051	1.16057e-05	0.3	-0.42	-0.31
VPS1	0.599756	0.181746	-0.139641	0.0106727	0.0144935	0.802093	-0.375	-0.05	-0.03
RPS14B	-0.755488	-0.861655	-0.412894	0.0106727	0.00289311	0.0305717	0.04	-0.52	-0.39
HXT3	-1.29577	-1.20163	-1.46385	0.0106752	0.0819138	0.612866	-0.01	-0.22	-0.8
YMR262W	0.840703	-0.508084	-1.03305	0.0106754	0.651174	0.507883	-0.005	0.19	0.24
SPS1	-2.35249	-0.507978	-0.0184121	0.010686	0.313545	0.378794		0.31	0.4
VHS2	0.585165	0.248335	0.361712	0.0107013	0.565026	0.135891	-0.865	-0.28	-0.17
PEP8	0.710634	-0.318329	0.00903257	0.0107173	0.175224	0.372339	-0.135	-0.02	0.05
THI4	-0.851749	-1.0262	-1.7288	0.0107282	0.892906	0.425874	-1.495	-2.69	-2.05
CDC31	0.752754	0.327694	0.80428	0.0107866	0.351814	9.1418e-05	0.65	1.1	1.02
RNQ1	0.593393	-0.0663	-0.126534	0.0108326	0.858022	0.676685	-0.67	-0.21	-0.21
PUF2	0.592152	-0.50442	-0.845316	0.0108579	0.000658464	0.0407394	-0.11	-0.3	-0.12
PDR11	0.55866	0.422205	-0.160294	0.010862	0.547931	0.591582	-0.255	-0.79	-1.03
VPS51	0.664809	0.708483	0.727375	0.0108855	0.00403834	0.000929103	0.71	0.58	0.43
HMO1	-0.633377	-0.599978	-0.643178	0.0109094	0.835394	0.027135	-0.51	0.41	0.12
NUR1	0.816459	-0.0705558	0.398453	0.0109151	0.835962	0.118408	0.265	0.42	0.49
YJR087W	-1.25415	-1.09356	-0.580992	0.0110029	0.0016299	0.0432295	-3.2	0.71	0.61
YGL101W	-0.622848	0.225893	-0.133019	0.0110029	0.0731413	0.2796	0.04	-0.16	0.05
TAH18	-0.916033	0.304915	0.0565057	0.0111017	0.0627478	0.652096	-0.31	0.04	-0.06
COS9	-0.901428	-0.175795	-0.147482	0.0111141	0.0269473	0.432721	0.575	0.48	0.46
ATG26	0.608989	-0.0596399	-0.157104	0.0112128	0.00157192	0.566831	-1.075	-0.5	-0.68
POP2	0.653449	0.510548	0.726539	0.0113695	0.817393	0.599409	-0.51	0.14	0.33
AVT2	-0.829485	-0.491241	-0.224195	0.0113869	0.352439	0.779909	-0.07	-0.78	-0.57
AFT2	-0.633399	0.538245	0.472763	0.0113869	0.000347447	0.954903	-0.91	-0.58	-0.47
SPF1	-0.614303	-0.239742	-0.336685	0.0114003	0.660594	0.239123	0.245	-0.27	-0.27
MRS6	-0.633244	-0.524362	-0.821471	0.0114568	0.00100064	0.000617335	-0.125	0.12	0.16
RPL43B	-0.822135	-1.06324	-0.787214	0.0114768	0.194346	0.892991	-0.215	0.01	-0.23
ALG9	-0.634874	-0.372252	-0.214668	0.0115626	0.761507	0.843506	0.47	0.13	0.28
DPH2	-0.612706	0.687744	0.503105	0.01162	0.611404	0.00105992	0.19	0.12	0.1
DAL7	0.774279	1.1138	0.0548619	0.0116275	0.965863	0.985463	-0.645	0.6	-0.58	NCR
TPK3	-0.583936	-0.264204	-0.0419571	0.011638	0.000793828	6.13635e-05	0.33	0.61	0.4
YMR315W	0.615897	-1.63815	-1.61063	0.0116578	1	0.76973	0.14	0.26	0.45
SNT309	-0.99579	0.60279	0.46773	0.0116659	0.0144212	0.0204917	0.52	0.6	0.72
YKR045C	0.66661	1.24629	0.694431	0.0116879	0.959972	0.0130907	-0.225	0.06	0.03
RPP1	-0.827996	0.276562	-0.688387	0.0116929	0.134651	0.424366	0.12	0.18	-0.06
SEC9	0.572127	0.150337	0.579495	0.0117251	0.910978	0.922839	-0.28	0.04	0.02
BUD13	0.65349	0.34409	0.624006	0.0117282	0.316924	0.968994		-0.18	-0.04
ABD1	0.617357	0.39011	-0.173446	0.0117299	0.0179315	0.158861	0.47	0.61	0.36
AZR1	0.713264	0.417217	0.315014	0.0117491	0.577495	0.255186			0.14
SCM3	0.772542	0.362277	0.522883	0.0117494	0.0503577	0.111968	0.035	0.06	-0.02
MET30	-0.704939	-0.406538	-0.741324	0.0117955	0.523573	0.384591	-1.415	-1.36	-1.42
PRS1	-0.63899	0.17908	-0.298882	0.0117999	0.0105653	0.138934	0.48	0.06	0.16
BPH1	0.539313	0.211909	0.022016	0.0118242	0.243164	2.46502e-10	-0.72	-0.43	-0.49
YMR087W	0.892786	-0.42672	-0.668934	0.0118349	0.113396	0.266659	0.03	-0.07	0.19
MYO4	-0.577121	0.0667243	-0.240996	0.0119075	0.337142	0.39693	0.12	0.24	0.13
LYS14	-0.608001	0.182406	0.381192	0.0119112	0.313545	0.0378431	0.065	0.24	-0.12
YGL149W	-0.790186	-0.354419	-0.728774	0.012041	0.535903	0.639573	0.435	-0.02	-0.02
ERG10	0.579858	-0.368192	-0.482414	0.012063	0.0324847	0.211616	0.725	0.77	0.52
YHL018W	0.994285	1.08958	0.248354	0.0120889	0.104992	0.292515		0.13	0.07
LYP1	-0.651735	-0.486466	-0.427931	0.0120889	0.0307998	0.100711	-0.535	-0.38	-0.38
DAN4	0.747963	0.804851	1.33166	0.0121274	0.0893794	0.657568	0.185	-0.62	-0.54
KIC1	0.649074	0.843775	0.588616	0.0121398	0.323693	0.0960501	-0.86	-0.34	-0.46
PFA3	-0.830298	0.318232	-0.10412	0.0121433	0.329458	0.0662762	0.64	0.18	0.08
IXR1	0.673767	1.06926	0.872219	0.0121748	0.00323161	0.209198	-0.45	0.06	0.29
EAF1	0.555906	0.174017	0.291958	0.0122338	2.22236e-08	0.029443		-0.26	-0.13
COS10	0.795519	0.669653	0.456949	0.0122492	0.62192	0.909446		1.03	0.65
SIP3	-0.643709	-0.254542	-0.249583	0.0122724	0.51551	0.332952	0.115	0.34	0.29
PHS1	-1.58109	-0.0264153	0.485951	0.0122724	0.579028	0.00843221	1.715	0.89	0.96
CTL1	-0.786077	-0.391494	-0.437968	0.0122738	0.997325	0.823013	0.175	0	0.29
RPS17A	-0.74192	-0.598892	-0.0191724	0.0122895	0.821689	0.000533743	-0.08	-0.1	-0.24
NPR3	-0.578793	-0.382596	-0.309742	0.0123814	1.08044e-06	0.565331	-1.04	-0.65	-0.83
ULI1	1.04045	1.0145	0.962828	0.0123841	0.000668519	0.00121305		-0.05	0.16
ARO80	0.765248	0.464342	0.0840795	0.0124024	0.255123	0.188869	-0.07	0.15	-0.12
MPD2	0.620735	-0.238087	-0.380504	0.0124028	0.00235537	0.000240437	-0.125	-0.25	-0.05
RPL26B	-0.899236	-1.14442	-0.705441	0.0124341	5.59444e-08	0.0987995	0.255	-0.16	-0.23
BUD9	-0.550144	-0.731994	-0.285402	0.0124464	0.000447919	0.067553	0.49	0.06	0.32
COQ1	0.632916	-0.171092	-0.289544	0.0124638	5.50391e-05	0.0160056	0.23	-0.08	0.06
POM152	-0.600788	0.40406	0.553111	0.0125678	0.790064	0.595819	0.22	0.11	-0.01
[truncated: 3,663 more rows]

## Sheet: Supplementary file 1C
Gene	Condition	gat1-1	gat1-2	gat1-3	gat1-KO
GAP1	YPD batch	0.609666	0.0872919	0.323001	NA
GAP1	AS chemostat	-0.321871	-0.864206	-0.00594307	NA
MEP2	YPD batch	0.271016	-0.0920711	-0.105561	NA
MEP2	AS	0.564064	0.229118	0.525178	-1.62269
MEP2	Pro	0.469559	NA	0.593231	-1.16057
DAL80	YPD batch	0.0626615	-0.578919	-0.039439	NA
DAL80	AS	-4.65123	-5.50398	-4.6572	-0.917548
DAL80	Pro	-4.42422	-5.30972	-4.46603	-1.2007
DAL80	Urea	-5.20712	-6.16094	-4.84161	NA
DAL80	Gln	-4.91499	-5.95878	-4.53816	NA
GZF3	YPD batch	0.0182499	-0.312157	-0.0273706	NA
GZF3	AS	0.829223	0.578135	0.787127	0.288887
GZF3	Pro	1.04743	NA	0.862228	1.40976

## Sheet: Supplementary file 1D
DNA motif	Allele	Fr_max	K_x
MEP2-1	GAT1-wt	0.98	2.46
	GAT1-1	NA	913.82
	GAT1-3	0.67	3.29
MEP2-2	GAT1-wt	0.72	0.9
	GAT1-1	48.69	3265.6
	GAT1-3	0.67	1.32
DAL80-1	GAT1-wt	0.63	1.27
	GAT1-1	23.75	2530.1
	GAT1-3	0.71	9.84

## Sheet: Supplementary file 1E
Strain Name	Genotype	Notes
DGY1	MATa	ancestral strain (FY4)
DGY2	MATα	isogenic to ancestral strain (FY5)
DGY500	MATa HO::prACT1-kanMX-ymCitrine	ancestral strain (FY4) containing constitutively expressed fluorescent protein
DGY840	MATa gat1-2	isolated from backcross
DGY1081	MATa gat1-1	isolated from backcross
DGY1088	MATa gat1-3	isolated from backcross
DGY1222	MATa HOΔ0::prGAP1-GFP-tGAP1-KANMX	construct introduced into DGY1
DGY1223	MATa HOΔ0::prMEP2-GFP-tMEP2-KANMX	construct introduced into DGY1
DGY1224	MATa HOΔ0::prGZF3-GFP-tGZF3-KANMX	construct introduced into DGY1
DGY1225	MATa HOΔ0::prDAL80-GFP-tDAL80-KANMX	construct introduced into DGY1
DGY1226	MATa HOΔ0::prGAT1-GFP-tGAT1-KANMX	construct introduced into DGY1
DGY1227	MATa gat1-1 HOΔ0::prGAP1-GFP-tGAP1-KANMX	construct introduced into DGY1081
DGY1228	MATa gat1-1 HOΔ0::prMEP2-GFP-tMEP2-KANMX	construct introduced into DGY1081
DGY1229	MATa gat1-1 HOΔ0::prGZF3-GFP-tGZF3-KANMX	construct introduced into DGY1081
DGY1230	MATa gat1-1 HOΔ0::prDAL80-GFP-tDAL80-KANMX	construct introduced into DGY1081
DGY1231	MATa gat1-1 HOΔ0::prGAT1-GFP-tGAT1-KANMX	construct introduced into DGY1081
DGY1232	MATa gat1-2 HOΔ0::prGAP1-GFP-tGAP1-KANMX	construct introduced into DGY840
DGY1233	MATa gat1-2 HOΔ0::prMEP2-GFP-tMEP2-KANMX	construct introduced into DGY840
DGY1234	MATa gat1-2 HOΔ0::prGZF3-GFP-tGZF3-KANMX	construct introduced into DGY840
DGY1235	MATa gat1-2 HOΔ0::prDAL80-GFP-tDAL80-KANMX	construct introduced into DGY840
DGY1236	MATa gat1-2 HOΔ0::prGAT1-GFP-tGAT1-KANMX	construct introduced into DGY840
DGY1237	MATa gat1-3 HOΔ0::prGAP1-GFP-tGAP1-KANMX	construct introduced into DGY1088
DGY1238	MATa gat1-3 HOΔ0::prMEP2-GFP-tMEP2-KANMX	construct introduced into DGY1088
DGY1239	MATa gat1-3 HOΔ0::prGZF3-GFP-tGZF3-KANMX	construct introduced into DGY1088
DGY1239	MATa gat1-3 HOΔ0::prDAL80-GFP-tDAL80-KANMX	construct introduced into DGY1088
DGY1240	MATa gat1-3 HOΔ0::prGAT1-GFP-tGAT1-KANMX	construct introduced into DGY1088
DGY1327	MATα/a GAT1/gat1-1 HO/HOΔ0::pGAP1-GFP-tGAP1-KanMX	FY5 mated to DG1227
DGY1328	MATα/a GAT1/gat1-1 HO/HOΔ0::pMEP2-GFP-tMEP2-KanMX	FY5 mated to DG1228
DGY1329	MATα/a GAT1/gat1-1 HO/HOΔ0::pGZF3-GFP-tGZF3-KanMX	FY5 mated to DG1229
DGY1330	MATα/a GAT1/gat1-1 HO/HOΔ0::pDAL80-GFP-tDAL80-KanMX	FY5 mated to DG1230
DGY1331	MATα/a GAT1/gat1-1 HO/HOΔ0::pGAT1-GFP-tGAT1-KanMX	FY5 mated to DG1231
DGY1350	MATa gat1Δ0::NatR HOΔ0::prGAP1-GFP-tGAP1-KANMX	deletion of GAT1 ORF in DGY1222
DGY1351	MATa gat1Δ0::NatR HOΔ0::prMEP2-GFP-tMEP2-KANMX	deletion of GAT1 ORF in DGY1223
DGY1352	MATa gat1Δ0::NatR HOΔ0::prGZF3-GFP-tGZF3-KANMX	deletion of GAT1 ORF in DGY1224
DGY1353	MATa gat1Δ0::NatR HOΔ0::prDAL80-GFP-tDAL80-KANMX	deletion of GAT1 ORF in DGY1225
DGY1354	MATa gat1Δ0::NatR HOΔ0::prGAT1-GFP-tGAT1-KANMX	deletion of GAT1 ORF in DGY1226
DGY1364	MATa MEP2_1kb_del_5'_of_ORF::NatR	deletion of MEP2pr in DGY1
DGY1365	MATa MEP2Δ0::NatR	deletion of MEP2 ORF in DGY1
DGY1368	MATa gat1-1 MEP2_1kb_del_5'_of_ORF::NatR	deletion of MEP2pr in DGY1081
DGY1369	MATa gat1-1 MEP2Δ0::NatR	deletion of MEP2 ORF in DGY1081
DGY1370	MATa gat1-3 MEP2_1kb_del_5'_of_ORF::NatR	deletion of MEP2pr in DGY1088
DGY1371	MATa gat1-3 MEP2 ORF Δ0::NatR	deletion of MEP2 ORF in DGY1088
DGY1774	MATa MEP2 CNV amplification 1 (~3 copies)	isolated from Ammonium Sulfate limited chemostat evolution R1 after 249.2 generations
DGY1775	MATa MEP2 CNV amplification 2 (~3 copies)	isolated from Ammonium Sulfate limited chemostat evolution R2 after 249.2 generations
DGY1776	MATa MEP2 CNV amplification 3 (~2 copies)	isolated from Ammonium Sulfate limited chemostat evolution R3 after 249.2 generations

## Sheet: Supplementary file 1F
Plasmid name	Vector	Insert
DGP269	pGEX-4T2	151 amino acid long protein fragment of GAT1 (WT) containing the DNA binding domain (DBD) (positions 254-404)
DGP270	pGEX-4T2	151 amino acid long protein fragment of gat1-1 containing the DNA binding domain (DBD) (positions 254-404)
DGP271	pGEX-4T2	151 amino acid long protein fragment of gat1-3 containing the DNA binding domain (DBD) (positions 254-404)
DGP274	pTH6838	151 amino acid long protein fragment of GAT1 (WT) containing the DNA binding domain (DBD) (positions 254-404)
DGP275	pTH6838	151 amino acid long protein fragment of gat1-1 containing the DNA binding domain (DBD) (positions 254-404)
DGP276	pTH6838	151 amino acid long protein fragment of gat1-3 containing the DNA binding domain (DBD) (positions 254-404)
