# Supplementary figures and images for: An incoherent feedforward loop facilitates adaptive tuning of gene expression
Source: eLife journal article supplement (doi:10.7554/elife.32323), 2018-04-05

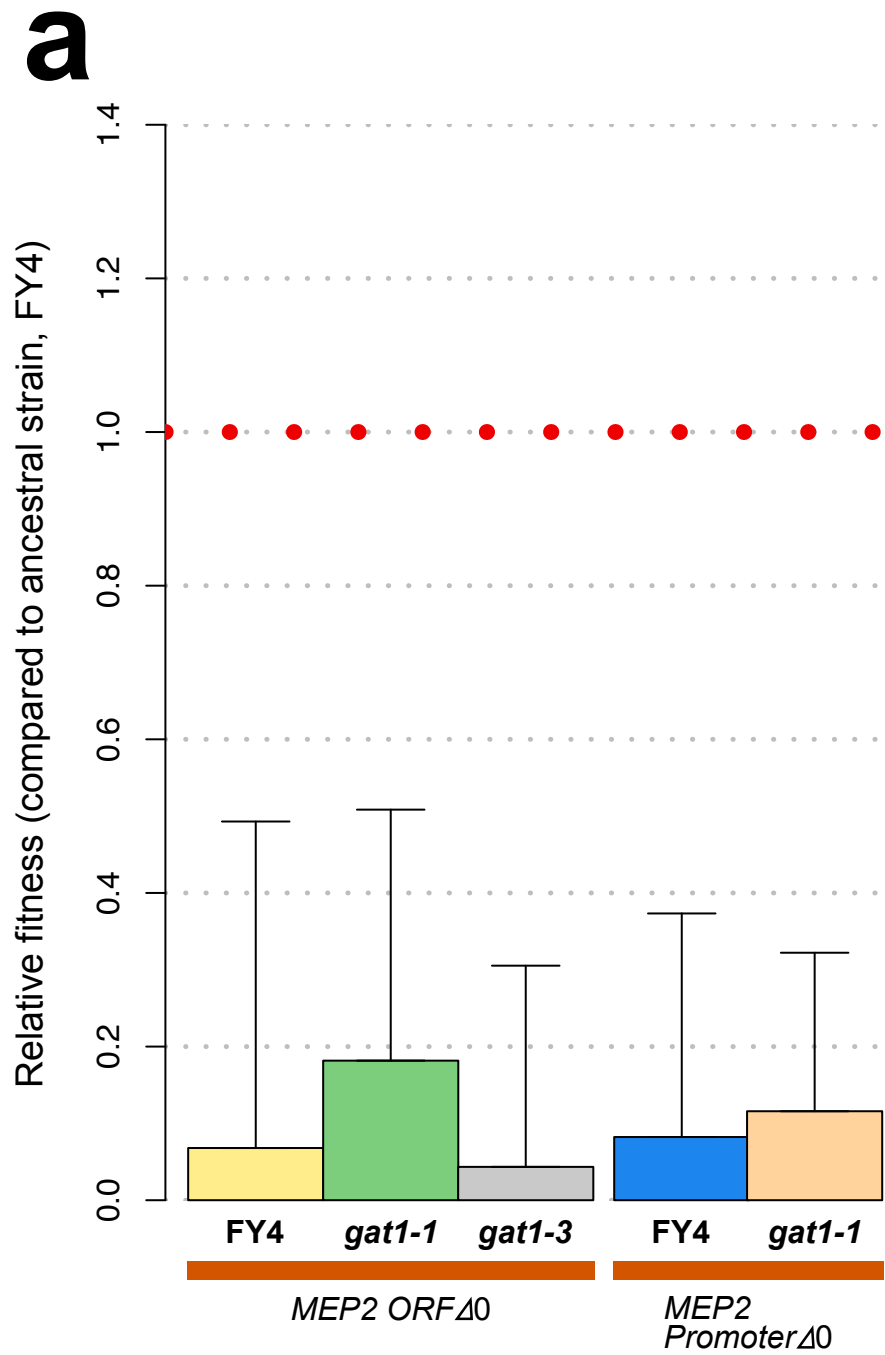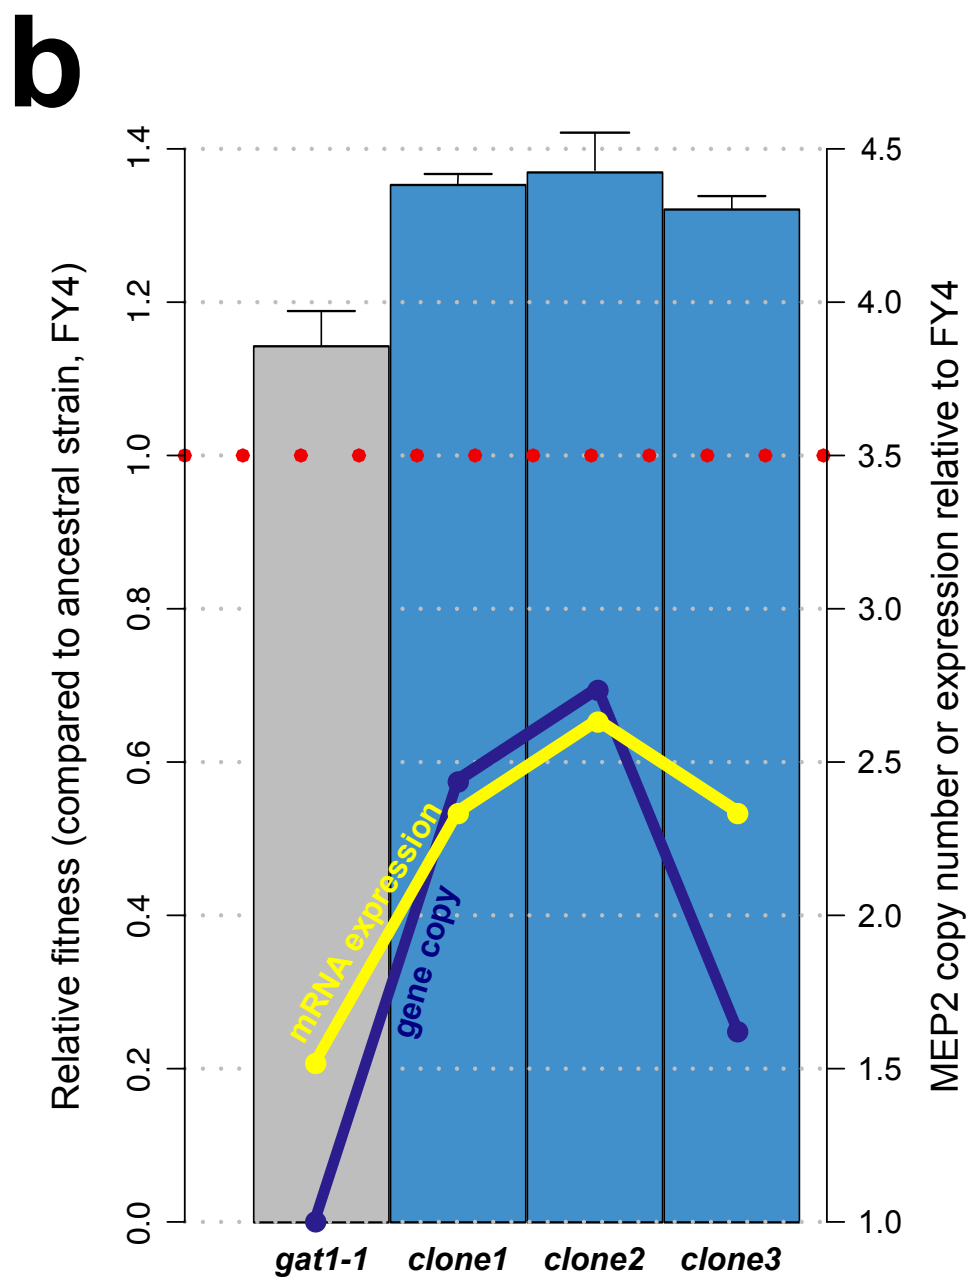

Supplement: supp [file elife-32323-supp-v1.zip]

**A**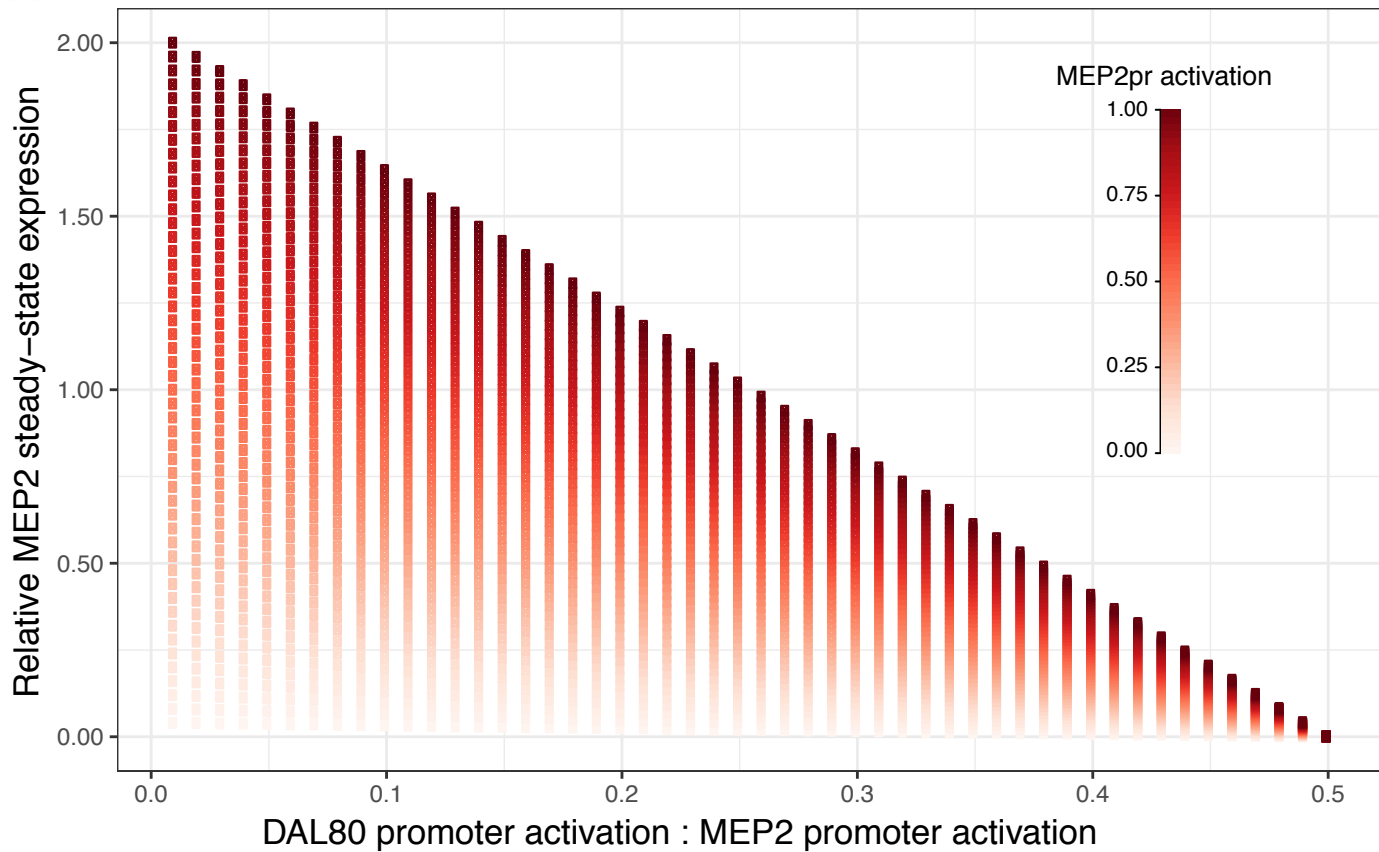**B**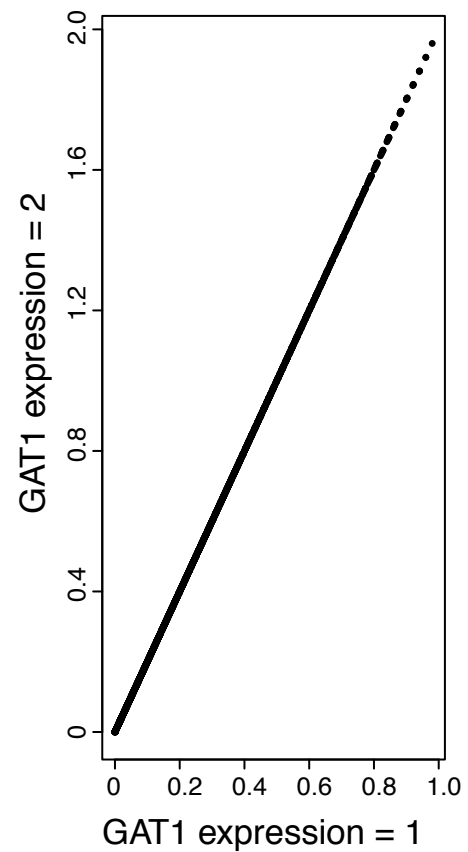

Supplement: supp [file elife-32323-supp-v1.zip]

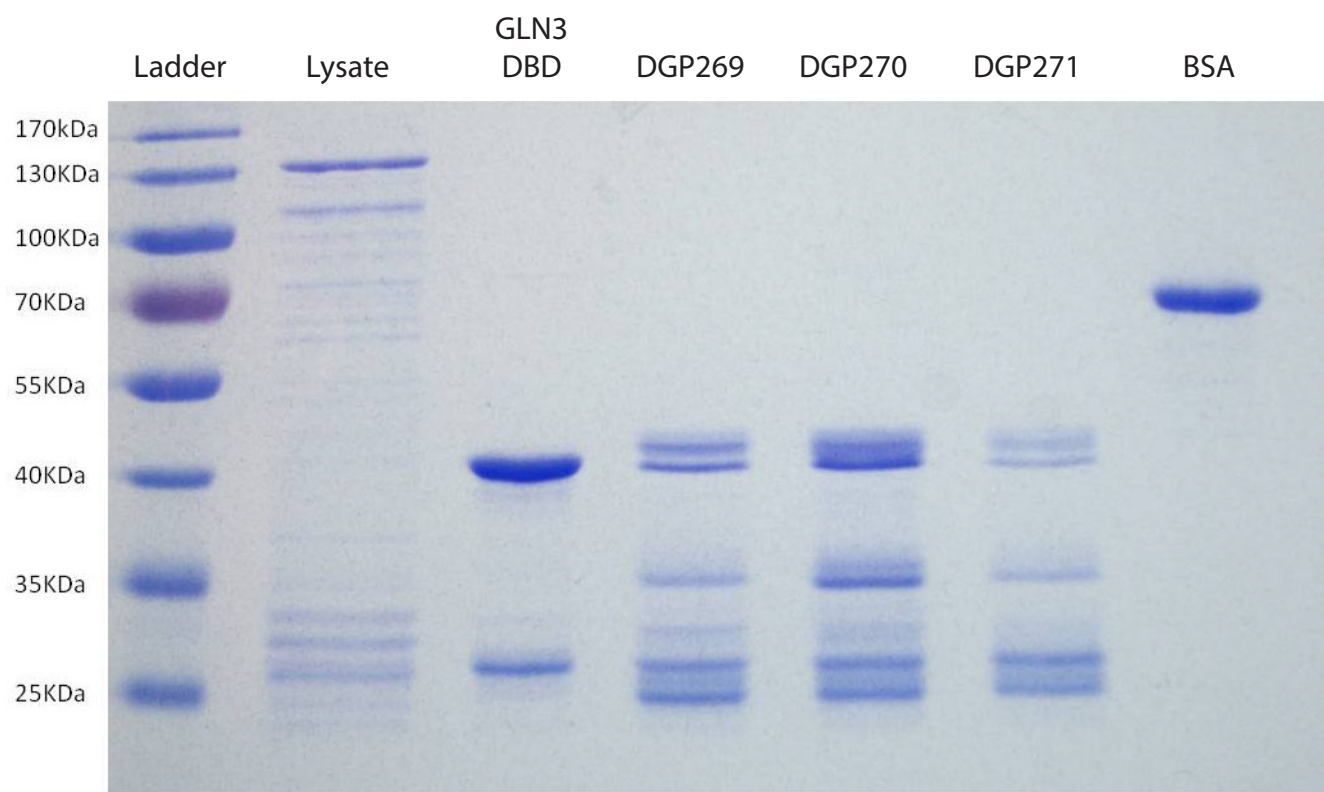

Supplement: supp [file elife-32323-supp-v1.zip]

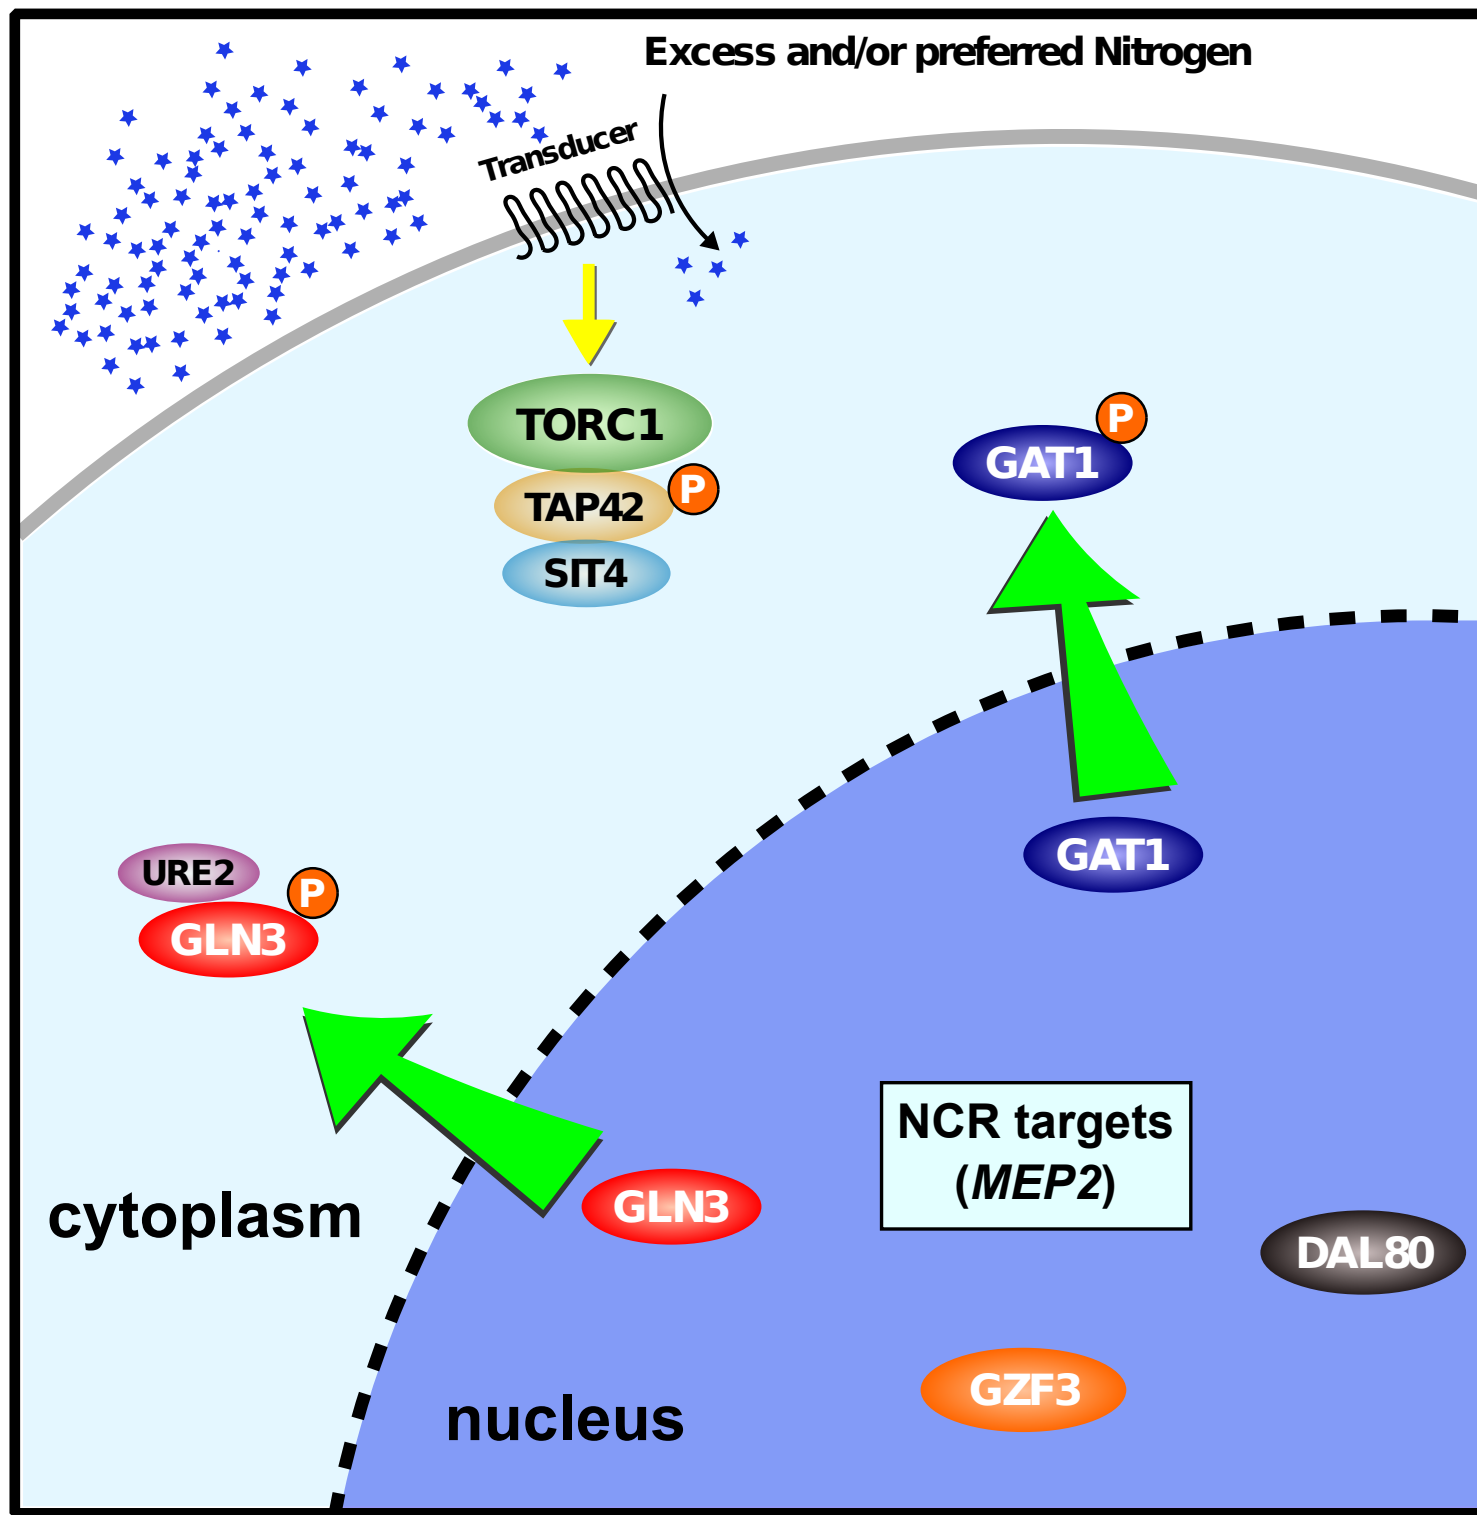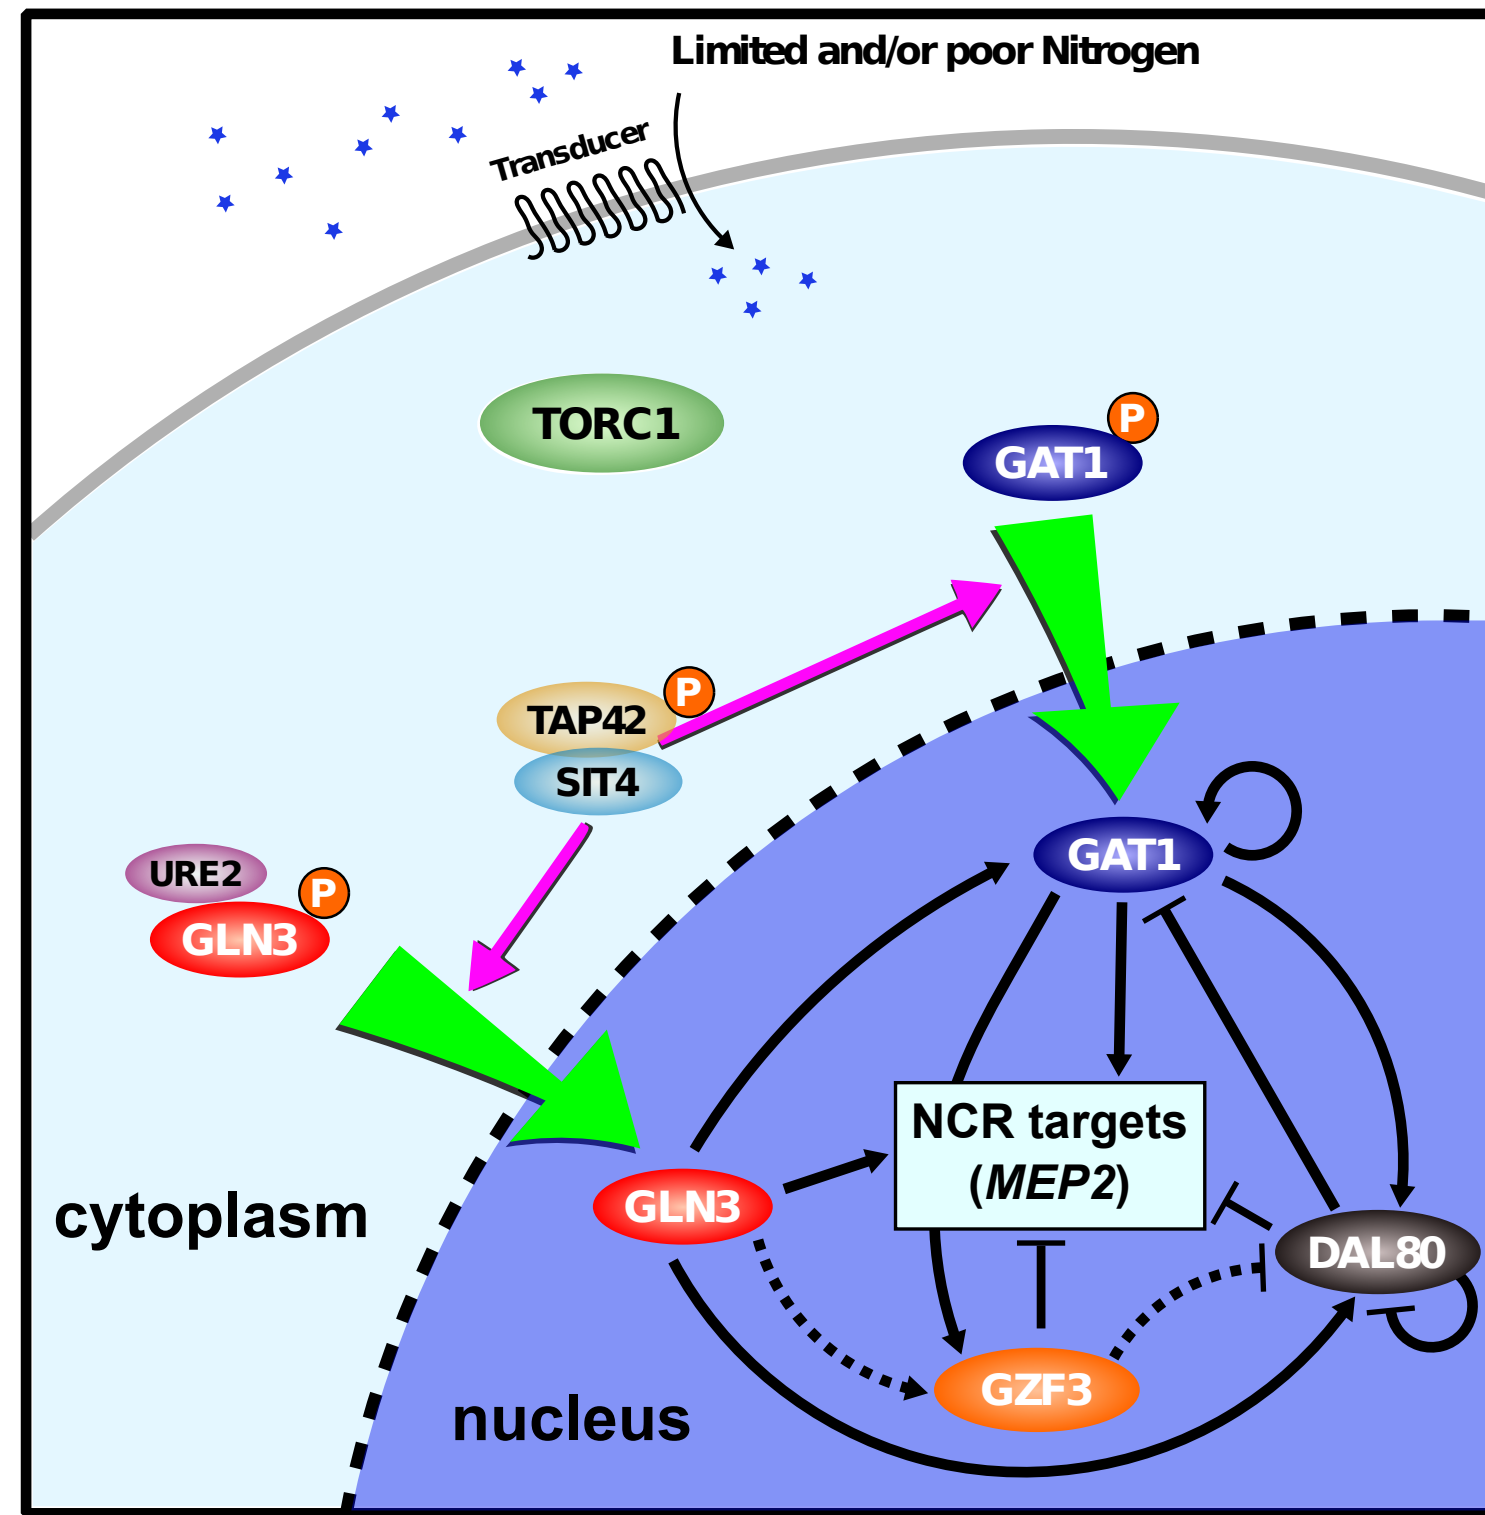

Supplement: supp [file elife-32323-supp-v1.zip]

## *pMEP2*

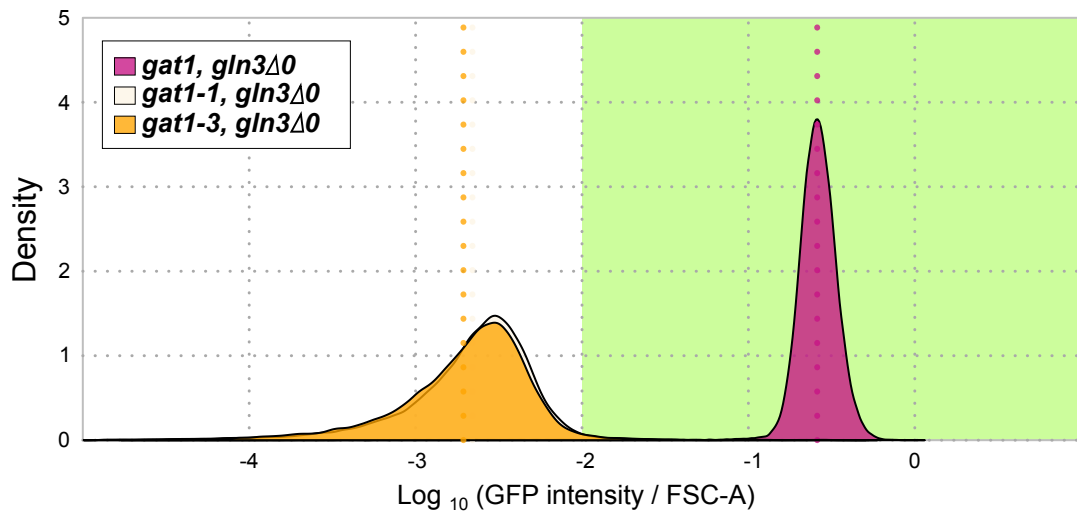

## *pDAL80*

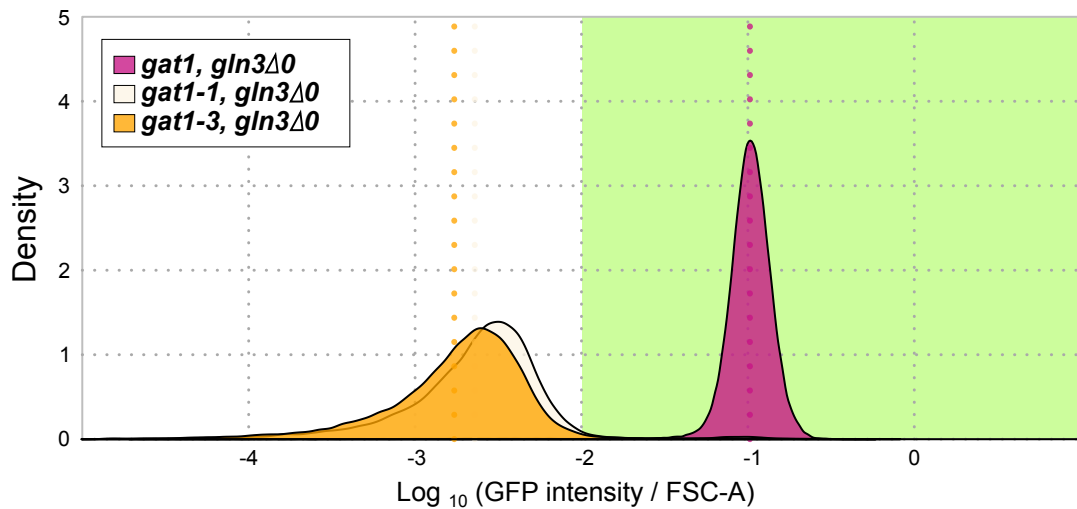

Supplement: supp [file elife-32323-supp-v1.zip]

**a**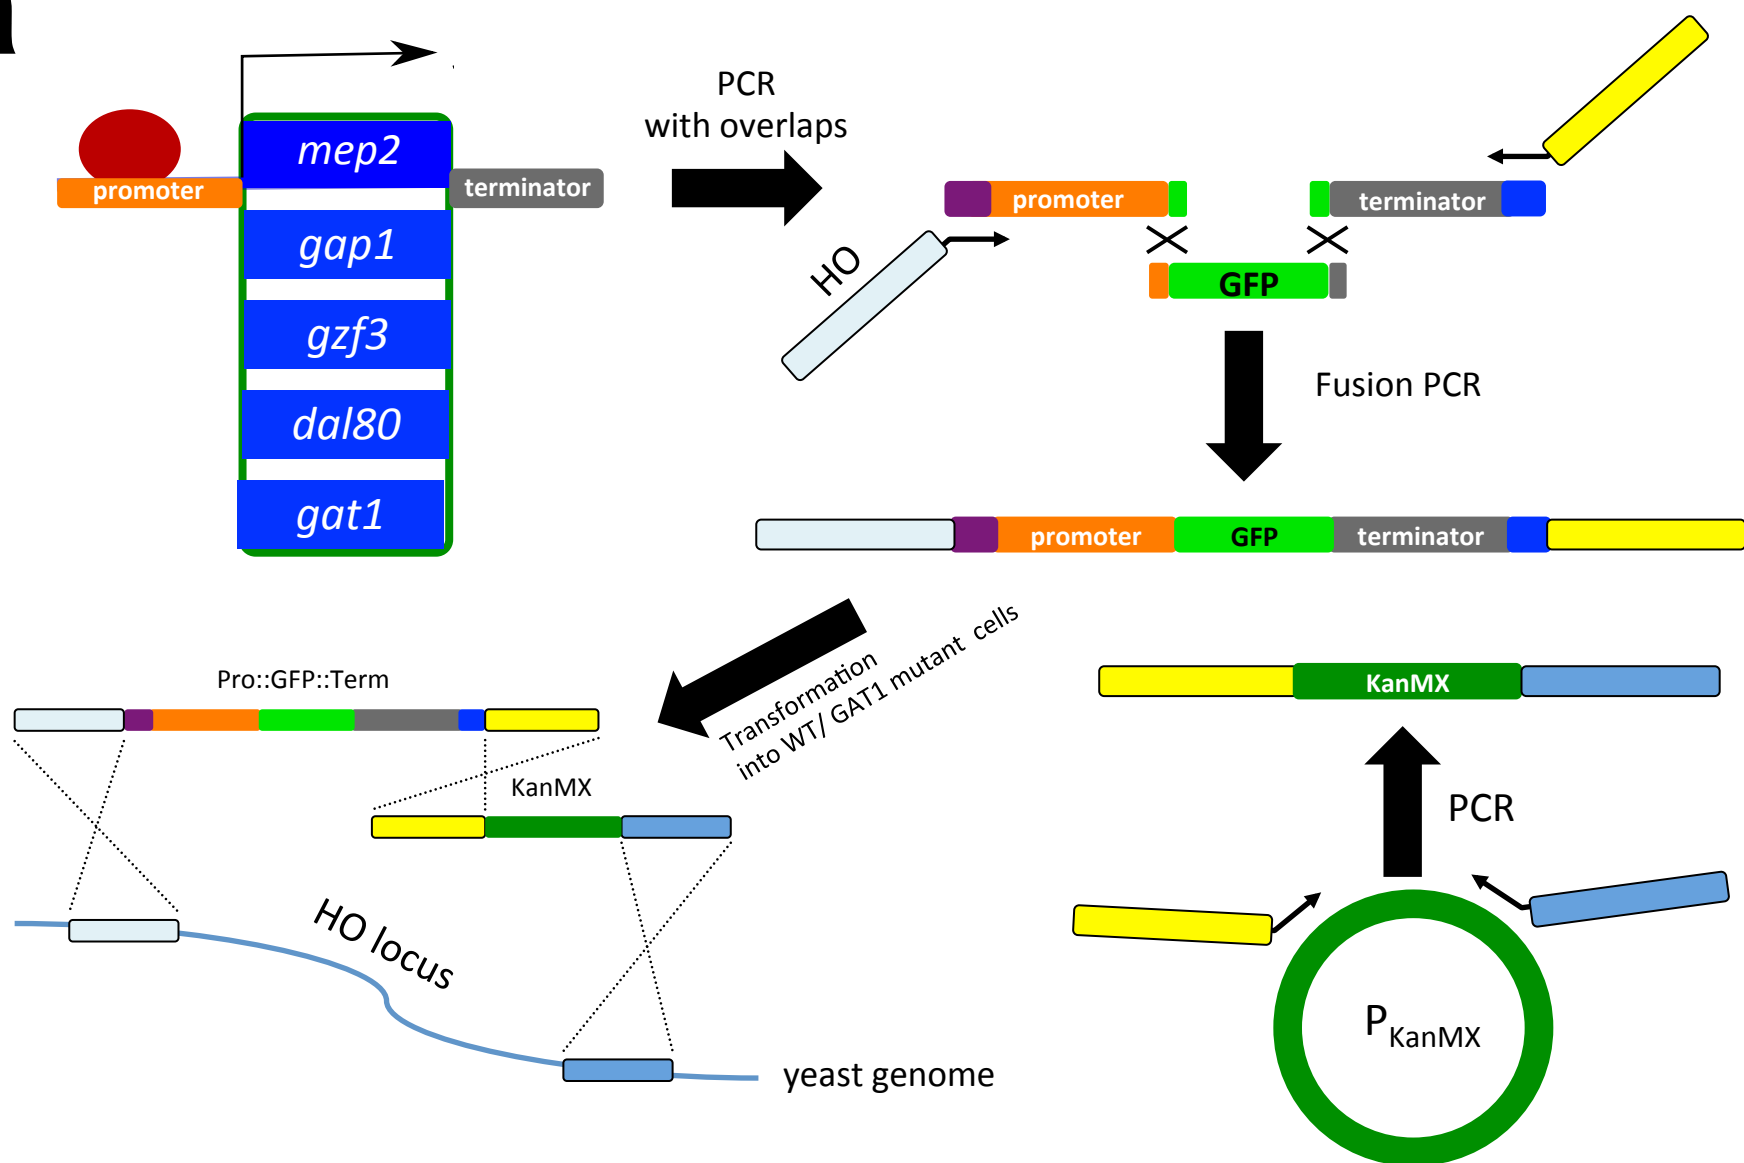**b**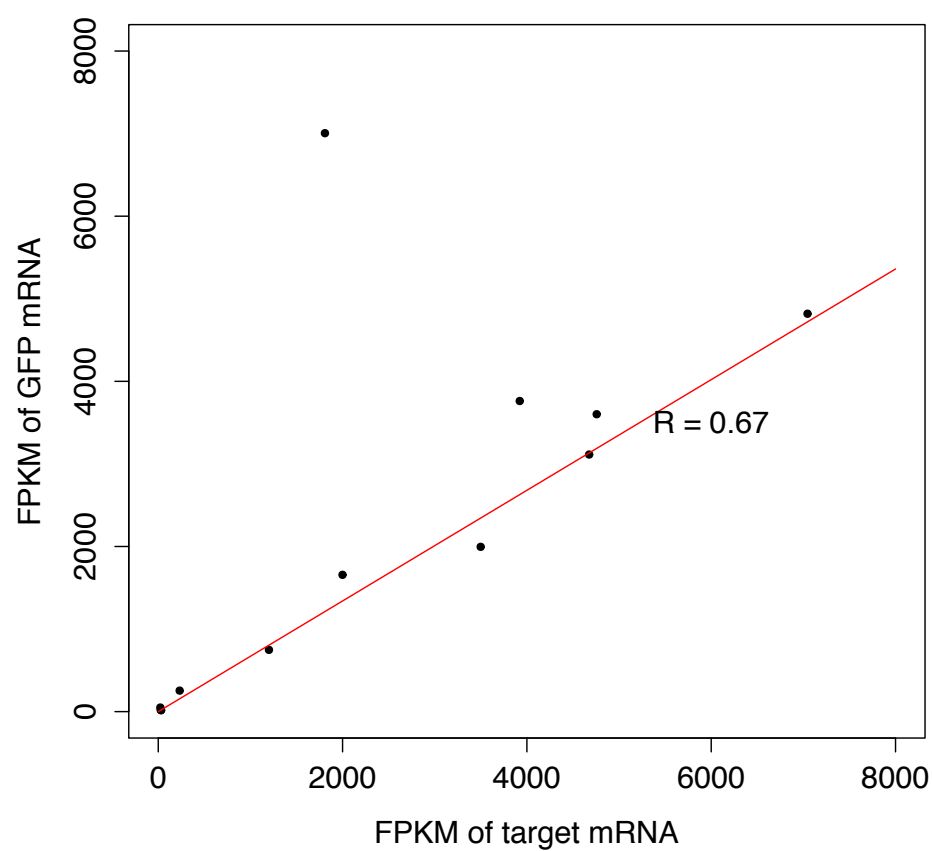**c**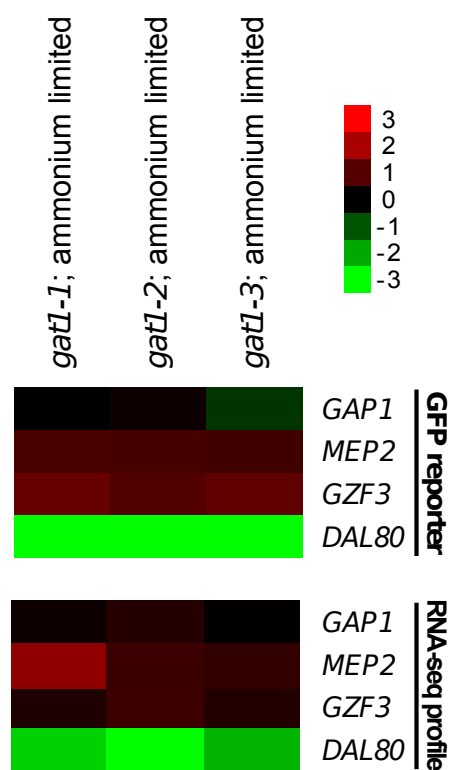

Supplement: supp [file elife-32323-supp-v1.zip]
